# Supplementary material for: Rational design of mimetic peptides based on aldo-ketoreductase enzyme as asymmetric organocatalysts in aldol reactions
Source: Royal Society of Chemistry journal article supplement (doi:10.1039/c4ra04866k), 2014-01-01

## Supporting information

### **Rational design of mimetic peptides based on aldo-ketoreductase enzyme as asymmetric organocatalyst in aldol reactions**

Saadi Bayat<sup>1,2</sup>, Bimo Ario Tejo<sup>6</sup>, Abu Bakar Salleh<sup>1,3</sup>, Emilia Abd malek<sup>1,2</sup>, Normi M. Yahaya<sup>1,4</sup> and Mohd Basyaruddin Abdul Rahman<sup>1,2,5\*</sup>

<sup>1</sup>*Enzyme and Microbial Technology Research Centre, Universiti Putra Malaysia, 43400 Serdang, Selangor Darul Ehsan, Malaysia.*

<sup>2</sup>*Department of Chemistry, Faculty of Science, Universiti Putra Malaysia, 43400 Serdang, Selangor Darul Ehsan, Malaysia.*

<sup>3</sup>*Department of Biochemistry; Department of Cell and Molecular Biology, Universiti Putra Malaysia, 43400 Serdang, Selangor Darul Ehsan, Malaysia.*

<sup>4</sup>*Faculty of Biotechnology and Biomolecular Sciences, Universiti Putra Malaysia, 43400 Serdang, Selangor Darul Ehsan, Malaysia.*

<sup>5</sup>*Structural and Synthetic Biology Research Centre, Malaysia Genome Institute, Jalan Bangi, 43000 Kajang, Selangor Darul Ehsan, Malaysia.*

<sup>6</sup>*Center for Infectious Diseases Research Surya University, Jl. Scientia, Boulevard Blok U/7, Gading Serpong, Tangerang 15810, Banten, Indonesia*

\*Corresponding Author: [\\*basya@upm.edu.my](mailto:*basya@upm.edu.my), Tel: +60389466798, +603 8943 5380

### **General**

All chemicals were purchased and used without further purification. Recombinant Human AKR1A1 aldehyde reductase (Homo sapiens, freeze-dried CFE, in 20 mM sodium phosphate, cat.no. = Pro-E0601) was purchased from Prozomix company to employ as a control promiscuous asymmetry biocatalyst in the aldol reaction. Analytical thin layer chromatography (TLC) was performed using Merck 60 F<sub>254</sub> precoated silica gel plate (0.2 mm thickness). Flash chromatography was performed using Merck silica gel 60 (70-230 mesh). Fourier transforms infrared spectroscopy (FTIR); Perkin Elmer Spectrum 100 was used for identification of functional groups. NMR data were recorded on 700

MHz (Bruker), 500 MHz (JEOL) for  $^1\text{H}$ NMR and 127 MHz (Bruker) 100 MHz (JEOL JNM ECA) for  $^{13}\text{C}$  NMR spectrometer. The relative and absolute configurations (dr) of the Aldol reactions were determined by comparison with  $^1\text{H}$  NMR spectroscopic analysis. Mass spectra (MS) were measured with a spectrometer (DIMS QP5050A SHIMADZU). Optical rotations were measured on a JASCO P-2000 Polarimeter. Enantioselectivity were determined by HPLC (Waters 1525 Binary Pump and UV-Water 2489) analysis employing a Daicel ChiralCel OD-H, and ChiralPak AD-H columns (4.6mm×250mm). CD spectra were measured on a JASCO J-810 automatic recording spectropolarimeter.

### ➤ Experimental method

#### Characterizations of peptide 8aa

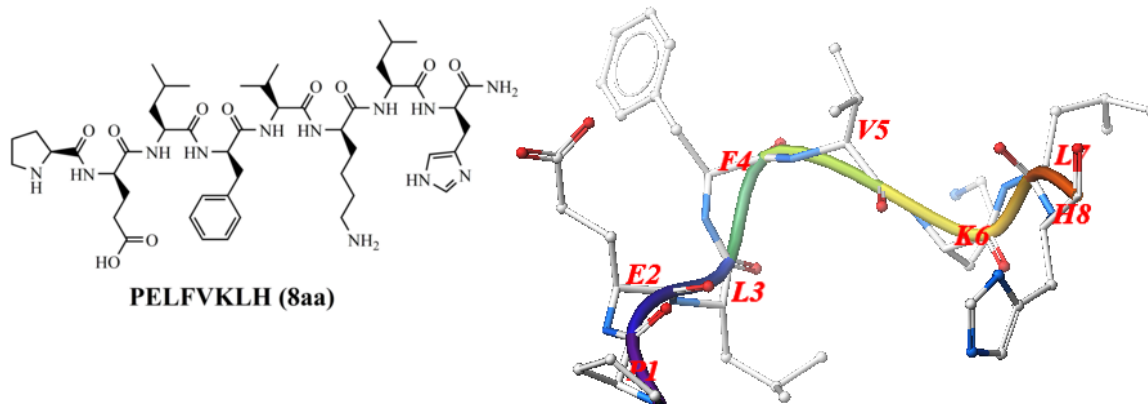

**IR** (neat)  $\nu = 3280, 3103, 2966, 2902, 1635, 1546, 1195, 1139, \text{cm}^{-1}$ ;  **$^1\text{H}$ NMR** (700 MHz,  $\delta = \text{ppm}$ );  $\delta = 8.71$  (d,  $J = 7.09$  Hz, 1H), 8.6 (s, 2H), 8.48 (d,  $J = 8.17$ , 1H), 8.33 (d,  $J = 7.0$  Hz, 1H), 8.19 (d,  $J = 7.45$  Hz, 1H), 8.28 (d,  $J = 7.19$  Hz, 1H), 8.26 (d,  $J = 6.84$  Hz, 1H), 7.97 (d,  $J = 7.89$  Hz, 1H), 7.53 (bs, 1H), 7.33 (m, 3H), 7.29 (m, 2H), 7.23 (d,  $J = 7.70$  Hz, 3H), 7.18 (s, 1H), 4.63 (m, 2H), 4.40 (t,  $J = 7.14$  Hz, 1H), 4.33 (m, 2H), 4.25 (m, 3H), 4.02 (t,  $J = 7.50$  Hz, 1H), 3.04 (m, 2H), 3.28 (dd,  $J = 15.48, 5.78$  Hz, 1H), 3.16 (dd,  $J = 15.50, 8.90, \text{Hz}$ , 1H), 3.09 (dd,  $J = 14.16, 6.55$  Hz, 1H), 3.00 (m, 4H), 2.45 (m,

2H), 2.39 (m, 2H), 2.34 (m, 2H), 1.99 (m, 6H), 1.79 (m, 1H), 1.70 (m, 3H), 1.58 (m, 1H), 1.5 (m, 2H), 1.45 (m, 2H), 0.89 (d,  $J = 5.00$  Hz, 12 H), 0.83 (d,  $J = 6.23$  Hz, 6H).  $^{13}\text{C}$ NMR (125.70 MHz,  $\text{D}_2\text{O}$ ,  $25^\circ\text{C}$ )  $\delta = 20.52, 20.96, 23.27, 23.56, 24.60, 24.70, 24.79, 26.36, 26.85, 26.93, 28.87, 28.91, 32.50, 32.78, 34.06, 39.58, 42.11, 42.39, 42.58, 54.95, 55.25, 55.80, 56.15, 57.64, 62.09, 62.26, 118.13, 119.80, 120.04, 121.50, 129.75, 131.31, 131.35, 131.81, 136.25, 138.81, 165.50, 165.70, 167.60, 172.3, 175.14, 175.33, 176.27, 176.57, 176.67, 177.10, 179.80$ . MS (Accurate Q-TOF LC/HRMS):  $m/z$  (%): 981.5887 (100) [M+H].

### Spectroscopic data of peptide PH16aa

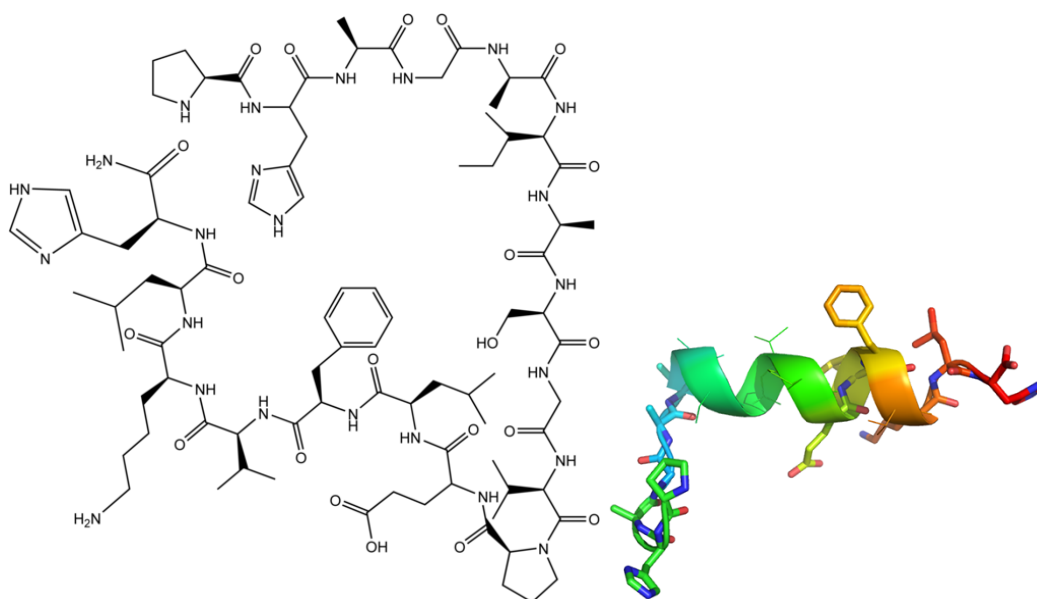

**IR** (neat)  $\nu = 3262, 3046, 2925, 2856, 1624, 1523, 1170, 1130, \text{cm}^{-1}$ ;  **$^1\text{H}$ NMR** (700 MHz,  $\delta = \text{ppm}$ );  $\delta = 8.48$  (s, 2H), 8.45 (s, 2H), 8.40 (d,  $J = 6.15$  Hz, 1H), 8.38 (d,  $J = 6.15$  Hz, 1H), 8.26 (d,  $J = 6.50$  Hz, 1H), 8.20 (d,  $J = 6.50$  Hz, 1H), 8.19 (d,  $J = 6.55$  Hz, 1H), 8.15 (d,  $J = 7.55$  Hz, 1H), 8.12 (m, 2H), 7.97 (d,  $J = 7.55$  Hz, 1H), 7.89 (d,  $J = 7.29$  Hz, 1H), 7.53 (bs, 1H), 7.32 (t,  $J = 7.15$  Hz, 3H), 7.27 (d,  $J = 7.00$  Hz, 2H), 7.26 (bs, 2H), 7.22 (m, 3H), 7.17 (bs, 1H), 4.41 (t,  $J = 7.06$  Hz, 1H), 4.35 (m, 4H), 4.24 (m, 3H), 4.17 (dd,  $J = 14.75, 5.70$  Hz, 1H), 4.13 (t,  $J = 7.50$  Hz, 1H), 3.97 (m, 2H), 3.94 (d,  $J = 5.00$  Hz, 2H), 3.89 (dd,  $J = 12, 5.22$  Hz, 1H), 3.84 (dd,  $J = 11.5, 4.80$  Hz, 1H), 3.68 (q,  $J = 9.25$  Hz, 1H), 3.39 (m, 2H), 3.26 (d,  $J = 5.40$  Hz, 1H), 3.24 (t,  $J = 6.54$  Hz, 1H), 3.18 (dd,  $J = 15.00, 8.00$  Hz, 1H),



(t,  $J = 7.12$  Hz, 1H), 4.35 (m, 2H), 4.23 (m, 3H), 4.02 (t,  $J = 7.52$  Hz, 1H), 3.08 (m, 2H), 3.27 (dd,  $J = 15.48, 5.78$  Hz, 1H), 3.14 (dd,  $J = 15.50, 8.91$  Hz, 1H), 3.10 (dd,  $J = 14.12, 6.65$  Hz, 1H), 3.06 (m, 4H), 2.42 (m, 2H), 2.32 (m, 2H), 2.31 (m, 2H), 1.94 (m, 6H), 1.71 (m, 1H), 1.72 (m, 3H), 1.58 (m, 1H), 1.53 (m, 2H), 1.43 (m, 2H), 0.85 (d,  $J = 5.00$  Hz, 12.00 H), 0.81 (d,  $J = 6.20$  Hz, 6H).

$^{13}\text{C}$ NMR (125.7 MHz,  $\text{CD}_3\text{OD}$ ,  $25^\circ\text{C}$ )  $\delta = 18.29, 19.78, 21.63, 22.15, 22.77, 23.55, 24.31, 24.36, 26.39, 26.65, 27.91, 28.15, 28.17, 30.62, 31.03, 31.55, 32.21, 38.18, 41.29, 41.69, 47.57, 53.59, 54.03, 54.54, 54.66, 55.86, 57.45, 61.06, 61.92, 67.44, 118.73, 128.08, 128.82, 129.09, 129.58, 129.72, 130.38, 131.39, 134.87, 138.10, 138.58, 169.99, 173.93, 174.33, 174.39, 174.90, 175.19, 176.44$ .

MS (Accurate Q-TOF LC/HRMS):  $m/z$  (%): 1115.6262 (100)  $[\text{M}+\text{H}]^+$

### Spectroscopic data of PELFV-NH<sub>2</sub> (5aa)

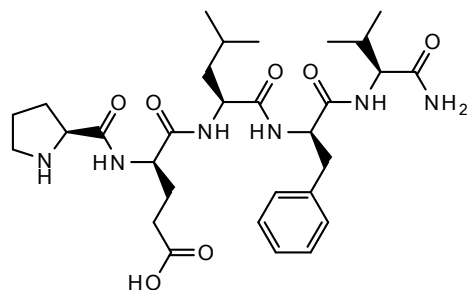

IR (neat)  $\nu = 3342, 3125, 3085, 2975, 2846, 1665, 1546, 1187, 1135, \text{cm}^{-1}$ ;  $^1\text{H}$ NMR (700 MHz,  $\delta = \text{ppm}$ );  $\delta = 8.74$  (s, 1H), 8.35 (d,  $J = 7.01$  Hz, 1H), 8.33 (d,  $J = 7.50$  Hz, 1H), 7.99 (d,  $J = 8.32$  Hz, 1H), 7.35 (t,  $J = 7.50$  Hz, 2H), 7.29 (t,  $J = 7.02$  Hz, 1H), 7.25 (d,  $J = 7.60$  Hz), 7.16 (bs, 1H), 6.90 (bs, 1H), 4.30 (m, 2H), 4.03 (t,  $J = 7.78$  Hz, 2H), 3.70 (s, 1H), 3.41 (m, 3H), 3.06 (m, 3H), 3.06 (dd,  $J = 13.52, 7.50$  Hz, 3H), 2.40 (m, 1H), 2.23 (m, 1H), 2.01 (m, 3H), 1.87 (m, 1H), 1.50 (m, 1H), 1.46 (m, 1H), 1.16 (dd,  $J = 6.25, 0.50$  Hz, 2H), 0.89 (d,  $J = 6.50$  Hz, 6H), 0.87 (d,  $J = 6.72$  Hz, 3H), 0.83 (d,  $J = 6.23$  Hz, 3H).

$^{13}\text{C}$ NMR (125.7 MHz,  $\text{D}_2\text{O}$ ,  $25^\circ\text{C}$ )  $\delta = 18.51, 19.78, 22.17, 23.42, 25.00, 25.30, 25.80, 28.55, 31.07, 31.60, 32.05, 38.62, 42.31, 47.55, 52.35, 53.16, 54.46, 56.04, 59.71, 61.01, 64.81, 66.95, 127.85, 129.54, 130.43, 138.32, 169.80, 173.04, 173.24, 174.25, 174.82, 175.71, 176.71$ .

MS (Accurate Q-TOF LC/HRMS):  $m/z$  (%): 603.3515 (100)  $[\text{M}+\text{H}]^+$

➤ **General procedure for aldol reaction catalyzed by peptide**

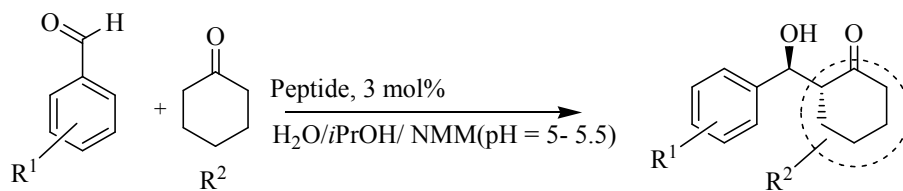

To H<sub>2</sub>O (0.6 mL) was added the corresponding catalyst (0.005 mmol, 5 mg), NMM (1 drop), and *i*PrOH (0.4 mL). The reaction mixture was stirred for 20 min followed by addition of the corresponding ketone (0.168 mmol, 1.2 eq). Then, the requisite aldehyde (0.14 mmol, 1 eq) was added to the reaction mixture. The resulting mixture was stirred at RT for 24 h. The reaction was monitored by TLC. Then treated with saturated ammonium chloride solution and the mixture was extracted with ethyl acetate (3×2mL). The combined organic extract was washed with brine, dried (Na<sub>2</sub>SO<sub>4</sub>), and concentrated in vacuo. After NMR analysis to determine diastereomeric ratio, the residue was purified by flash column chromatography with hexanes/ethyl acetate (3:1) to afford the aldol products that were subjected to chiral HPLC analysis to determine enantiomeric excesses.

**1- (R)-2-((S)-hydroxy(4-nitrophenyl)methyl)cyclohexanone**

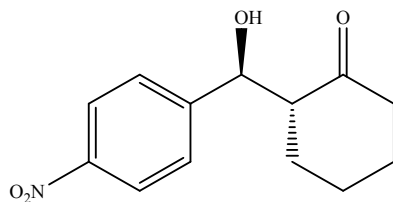

The resulting pure product was examined by <sup>1</sup>H NMR to determine the dr. The chromatography purified aldol products were then examined by HPLC to determine their *ee*. OD-H ChiralCel Column (4.6 ×250mm), yield: 97%; The *ee* was determined by chiral HPLC (Chiral OD-H, *i*PrOH/*n*-hexane 5/95, flow rate = 0.8 mL/min, λ = 254 nm): *t*<sub>major</sub>= 35.488 min, *t*<sub>minor</sub>= 47.551 min, *ee* = 97%, dr = 90:10 (anti/syn).

FT-IR (cm<sup>-1</sup>): 3510, 2938, 2901, 2875, 1686, 1603, 1507, 1339; <sup>1</sup>H NMR (500 MHz, CDCl<sub>3</sub>): δ (ppm) = 1.26-1.35 (m, 1H), 1.44-1.65 (m, 4H), 1.77 (d, *J* = 13.7 Hz, 1H), 2.06-2.11 (m, 1H), 2.30-2.37 (td, *J* = 13.75Hz, *J* = 6.9 Hz, 1H), 2.54-2.62 (m, 1H), 4.83 (d, *J* = 8 Hz, 1H), 7.44 (d, *J* = 9.15 Hz, 2H), 8.15 (d, *J* = 9.15 Hz, 2H)

$^{13}\text{C}$  NMR (100 MHz,  $\text{CDCl}_3$ )  $\delta$  = 24.62, 27.59, 30.69, 42.62, 57.12, 73.74, 123.40, 123.52, 126.56, 127.86, 147.49, 148.30, 214.78

DEPT $^{90}$  and  $^{135}$  deg show four methylene groups (negative) and 6 methine groups (positive) which in the aromatic area two of CH groups have been overlapped together.

MS (DI) = 249

## 2 *(R)*-2-*(S)*-hydroxy(phenyl)methyl)cyclohexanone

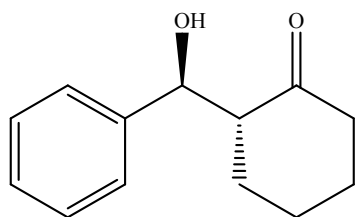

FT-IR ( $\text{cm}^{-1}$ ): 3508, 3112, 2935, 2862, 1692, 1510, 1338;  $^1\text{H}$  NMR (500 MHz,  $\text{CDCl}_3$ ):  $\delta$  (ppm) 1.73- 1.79 (m, 3H), 1.89- 1.94 (m, 3H), 2.51- 2.55 (t,  $J$  = 6.85 Hz, 2H), 2.83 (td,  $J$  = 12.2Hz,  $J$  = 5.4 Hz, 1H) - 2.91- 2.94 (m, 1H), 4.78 (d,  $J$  = 9.2 Hz, 1H), 7.4, (m, 5H)

$^{13}\text{C}$  NMR (100 MHz,  $\text{CDCl}_3$ )  $\delta$  = 23.86, 28.4, 28.92, 40.29, 60.48, 74.54, 128.32, 128.47, 129.2, 130.19, 130.29, 133.78, 215.18

MS(DI) = 204

## 3 2-(XXXhydroxyl(4-nitrophenyl)methyl)cycloheptanone

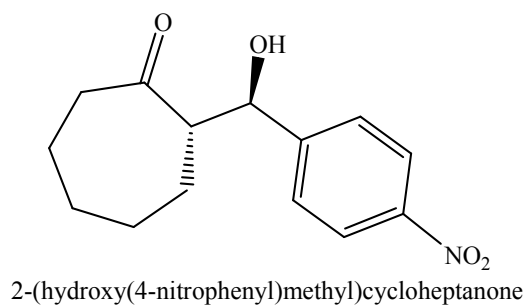

FT-IR (cm<sup>-1</sup>): 3100, 2928, 2860, 1704, 1603, 1346, 1117; <sup>1</sup>H NMR (500 MHz, CDCl<sub>3</sub>): δ (ppm) = 1.20- 1.45 (m, 4H), 1.65-1.92 (m, 4H), 2.40- 2.59 (m, 2H), 2.98 (m, 1H), 3.74 (d, *J* = 4.8 Hz, 1H), 4.92 (dd, *J* = 6.9, *J* = 5.2 Hz, 1H), 7.53 (d, *J* = 8.1 Hz, 2H), 8.21(d, *J* = 9.1Hz, 2H).

**4 *S*-2-((*S*)-(2-chlorophenyl)(XXXhydroxyl)methyl)cyclohexanone**

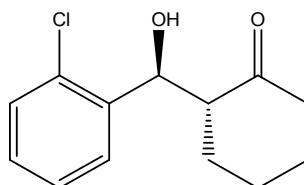

The resulting pure product was examined by <sup>1</sup>H NMR to determine the dr. The chromatography purified aldol products were then examined by HPLC to determine their *ee*. OD-H ChiralCel Column (4.6 ×250mm), yield: 95%; The *ee* was determined by chiral HPLC (Chiral OD-H, <sup>i</sup>PrOH/n-hexane 5/95, flow rate = 0.8 mL/min, λ = 254 nm): *t*<sub>major</sub>= 13.055 min, *t*<sub>minor</sub>= 15.552 min, *ee* = 99.9%, dr = 96:4 (anti/syn).

FT-IR (cm<sup>-1</sup>): 3437, 2940, 2864, 1696, 1438, 1030, 756; <sup>1</sup>H NMR (500 MHz, CDCl<sub>3</sub>): δ (ppm) = 1.54-1.64 (m, 5H), 1.79-1.81 (m, 1H), 2.04-2.08 (m, 1H), 2.29-2.35 (td, *J* = 13.75 Hz, *J* = 6.85 Hz 1H), 2.43-2.46 (m, 1H), 2.63-2.68 (m, 1H), 5.33 (d, *J*= 8 Hz, 1H), 7.19 (dd, *J* = 8, *J* = 5.7 Hz, 1H), 7.27-7.31 (m, 2H), 7.52 (dd, *J* = 8, *J* = 2.3 Hz, 1H).

<sup>13</sup>C NMR (100 MHz, CDCl<sub>3</sub>) δ = 24.89, 27.79, 30.37, 42.71, 57.56, 70.43, 127.23, 128.20, 128.73, 129.19, 132.94, 139.02, 215.32.

DEPT<sup>90</sup> and <sup>135</sup> deg demonstrate four methylene groups (negative) and 6 methine groups (positive).

MS(DI) = 238

**5 (*S*)-2-((*S*)-(4-chlorophenyl)(XXXhydroxyl)methyl)cyclohexanone**

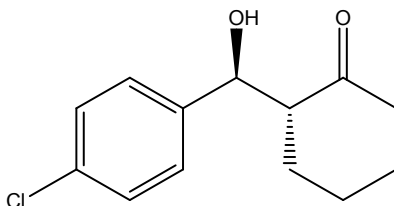



The resulting pure product was examined by  $^1\text{H}$  NMR to determine the dr. The chromatography purified aldol products were then examined by HPLC to determine their *ee*. OD-H ChiralCel Column (4.6  $\times$ 250mm). Yield: 95%; The *ee* was determined by chiral HPLC (Chiral OD-H, *i*PrOH/n-hexane 5/95, flow rate = 0.8 mL/min,  $\lambda$  = 254 nm):  $t_{\text{major}}$  = 13.831 min,  $t_{\text{minor}}$  = 17.452 min, *ee* = 96.54 %, dr = 93:7 (anti/syn).

FT-IR ( $\text{cm}^{-1}$ ): 2828, 2663, 2552, 1678, 1418, 1284, 926;  $^1\text{H}$  NMR (500 MHz,  $\text{CDCl}_3$ ):  $\delta$  (ppm) = 1.25-1.27 (m, 2H), 1.52-1.55 (m, 2H), 1.56-1.60 (m, 1H), 1.60-1.63 (m, 1H), 2.07-2.08 (m, 1H), 2.31-2.37 (td,  $J$  = 13.7 Hz,  $J$  = 6.8 Hz, 1H), 2.46-2.53 (m, 1H), 2.54-2.55 (m, 1H), 4.76 (d,  $J$  = 9.15 Hz, 1H), 7.25 (d,  $J$  = 9.15 Hz, 2H), 7.32 (d,  $J$  = 9.15 Hz, 2H).

$^{13}\text{C}$  NMR (100 MHz,  $\text{CDCl}_3$ )  $\delta$  = 24.67, 27.71, 30.74, 42.64, 57.30, 74.15, 128.48, 128.54, 129.26, 130.19, 133.79, 171.97, 215.44.

DEPT $^{90}$  and  $^{135}$  deg demonstrate four methylene groups (negative) and 6 methine groups (positive).

MS (DI) = 238

### 6 2-[Hydroxy-(4-cyano-phenyl)-methyl]-cyclohexanone

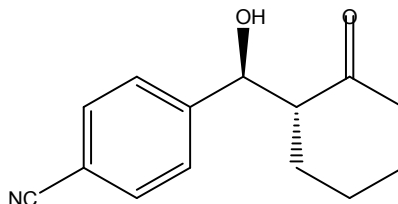

The resulting pure product was examined by  $^1\text{H}$  NMR to determine the dr. The chromatography purified aldol products were then examined by HPLC to determine their *ee*. OD-H ChiralCel Column (4.6  $\times$ 250mm), yield: 95%; The *ee* was determined by chiral HPLC (Chiral OD-H, *i*PrOH/hexane 5/95, flow rate = 0.8 mL/min,  $\lambda$  = 254 nm):  $t_{\text{major}}$  = 18.801 min,  $t_{\text{minor}}$  = 26.323 min, *ee* = 86 %, dr = 99:1 (anti/syn).

FT-IR ( $\text{cm}^{-1}$ ): 3425, 3356, 2932, 2860, 1688, 1481, 1053, 824;  $^1\text{H}$  NMR (500 MHz,  $\text{CDCl}_3$ ):  $\delta$  (ppm) = 1.61-1.71(m, 3H), 1.89-1.99 (m, 2H), 2.06-2.13 (m, 2H), 2.16-2.24 (m, 1H), 2.29-2.43 (m, 1H), 4.75 (d,  $J$  = 9.15 Hz, 1H), 5.31 (d,  $J$  = 2.3 Hz, 1H) 7.41 (dd,  $J$  = 2.3,  $J$  = 8 Hz, 2H), 7.58 (dd,  $J$  = 4.6,  $J$  = 8 Hz, 2H).

$^{13}\text{C}$  NMR (100 MHz,  $\text{CDCl}_3$ )  $\delta$  = 20.25, 22.24, 26.66, 38.94, 55.97, 74.43, 110.82, 118.71, 126.19, 127.17, 132.11, 148.30, 219.91.

DEPT<sup>90</sup> and <sup>135</sup> deg demonstrate four methylene groups (negative) and 6 methine groups (positive).

MS(DI) = 229

7 *(R)*-2-((*S*)-hydroxy(2-nitrophenyl)methyl)cyclohexanone

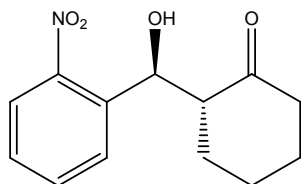

The resulting pure product was examined by <sup>1</sup>H NMR to determine the dr. The chromatography purified aldol products were then examined by HPLC to determine their *ee*. OD-H ChiralCel Column (4.6 ×250mm). yield: 95%; The *ee* was determined by chiral HPLC (Chiral OD-H, <sup>t</sup>PrOH/n-hexane 5/95, flow rate = 0.8 mL/min, λ = 254 nm): *t*<sub>major</sub> = 11.508 min, *t*<sub>minor</sub> = 16.098 min, *ee* = 88.8 %, dr = 98: 2 (anti/syn).

FT-IR (cm<sup>-1</sup>): 3411, 2942, 2866, 1703, 1524, 1349; <sup>1</sup>H NMR (500 MHz, CDCl<sub>3</sub>): δ (ppm) = 1.57-1.75(m, 5H), 1.80-1.83 (m, 1H), 2.04-2.09 (m, 1H), 2.27-2.34 (td, *J* = 13.75 Hz, *J* = 5.75 Hz, 1H), 2.40-2.43 (m, 1H), 5.42 (d, *J* = 6.85 Hz, 1H), 7.40 (t, *J* = 8 Hz, 1H), 7.60 (t, *J* = 8 Hz, 1H), 7.74 (d, *J* = 8 Hz, 1H), 7.81 (d, *J* = 8 Hz, 1H)

<sup>13</sup>C NMR (100 MHz, CDCl<sub>3</sub>) δ = 24.93, 27.72, 31.06, 42.78, 57.24, 69.70, 124.04, 128.36, 128.95, 133.05, 136.54, 148.67, 214.96.

DEPT<sup>90</sup> and <sup>135</sup> deg demonstrate four methylene groups (negative) and 6 methine groups (positive).

MS(DI) = 249

8 *(R)*-2-((*S*)-(4-bromophenyl)(hydroxy)methyl)cyclohexanone

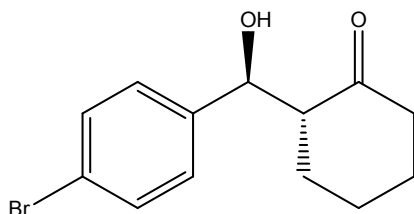

The resulting pure product was examined by  $^1\text{H}$  NMR to determine the dr. The chromatography purified aldol products were then examined by HPLC to determine their *ee*. OD-H ChiralCel Column (4.6  $\times$  250mm). yield: 95%; The *ee* was determined by chiral HPLC (Chiral OD-H, *i*PrOH/n-hexane 5/95, flow rate = 0.8 mL/min,  $\lambda$  = 254 nm): *t*<sub>major</sub> = 22.316 min, *t*<sub>minor</sub> = 29.783 min, *ee* = 85.8 %, dr = 90: 10 (anti/syn).

FT-IR (cm<sup>-1</sup>): 2941, 2833, 2659, 2550, 1678, 1415, 1281, 925;  $^1\text{H}$  NMR (500 MHz, CDCl<sub>3</sub>):  $\delta$  (ppm) = 1.24-1.32 (m, 1H), 1.49-1.70 (m, 4H), 1.77-1.85 (m, 1H), 2.06-2.11 (m, 1H), 2.31-2.37 (td, *J* = 13.7 Hz, *J* = 5.7 Hz, 1H), 2.43-2.48 (m, 1H), 2.51- 2.57 (m, 1H), 4.74 (d, *J* = 9.2 Hz, 1H), 7.19 (d, *J* = 8 Hz, 2H), 7.46 (d, *J* = 8 Hz, 2H).

$^{13}\text{C}$  NMR (100 MHz, CDCl<sub>3</sub>)  $\delta$  = 24.68, 27.69, 30.73, 42.64, 57.29, 74.14, 121.70, 127.50, 128.71, 131.24, 131.47, 139.95, 215.30.

DEPT<sup>90</sup> and <sup>135</sup> deg demonstrate four methylene groups (negative) and 6 methine groups (positive).

MS(DI) = 282

### 9 (*R*)-2-((*S*)-(4-(trifluoromethyl)phenyl)(hydroxy)methyl)cyclohexanone

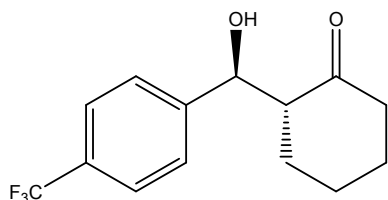

The resulting pure product was examined by  $^1\text{H}$  NMR to determine the dr. The chromatography purified aldol products were then examined by HPLC to determine their *ee*. OD-H ChiralCel Column (4.6  $\times$  250mm). Yield: 95%; The *ee* was determined by chiral HPLC (Chiral OD-H, *i*PrOH/n-hexane 5/95, flow rate = 0.8 mL/min,  $\lambda$  = 254 nm): *t*<sub>major</sub> = 13.407 min, *t*<sub>minor</sub> = 15.682 min, *ee* = 79.5 %, dr = 92: 8 (anti/syn).

FT-IR (cm<sup>-1</sup>): 3065, 2828, 2663, 2552, 1678, 1418, 1285, 928;  $^1\text{H}$  NMR (500 MHz, CDCl<sub>3</sub>):  $\delta$  (ppm) = 1.25-1.31 (m, 2H), 1.49-1.53 (m, 2H), 1.55-1.64 (m, 1H), 1.73-1.75 (m, 1H), 2.00- 2.06 (m, 1H), 2.26-2.32 (td, *J* = 5.7 Hz, *J* = 13.7 Hz, 1H), 2.40-2.43 (m, 1H), 2.50-2.55 (m, 1H), 4.77 (d, *J* = 8 Hz, 1H), 7.37 (d, *J* = 8 Hz, 2H), 7.53 (d, *J* = 8 Hz, 2H).

$^{13}\text{C}$  NMR (100 MHz, CDCl<sub>3</sub>)  $\delta$  = 24.70, 27.69, 30.74, 42.66, 57.24, 74.26, 125.58, 125.32, 127.35, 129.94, 130.20, 144.93, 215.12.

DEPT<sup>90</sup> and <sup>135</sup> deg demonstrate four methylene groups (negative) and 6 methine groups (positive).

MS(DI) = 272

**10 (R)-2-((S)-hydroxy(pyridin-4-yl)methyl)cyclohexanone**

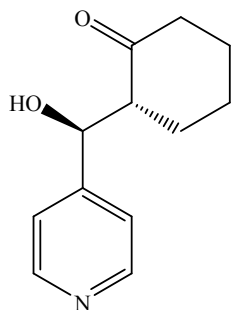

The resulting pure product was examined by  $^1\text{H}$  NMR to determine the dr. The chromatography purified aldol products were then examined by HPLC to determine their *ee*. AD-H ChiralPak Column (4.6  $\times$  250mm). Yield: 95%; The *ee* was determined by chiral HPLC (Chiral AD-H, *i*PrOH/*n*-hexane 5/95, flow rate = 0.8 mL/min,  $\lambda$  = 254 nm):  $t_{\text{major}}$  = 12.228 min,  $t_{\text{minor}}$  = 16.668 min, *ee* = 98 %, dr = 99:1 (anti/syn).

FT-IR ( $\text{cm}^{-1}$ ): 3100, 2928, 2860, 1704, 1603, 1413, 1117;  $^1\text{H}$  NMR (500 MHz,  $\text{CDCl}_3$ ):  $\delta$  (ppm) = 1.66-1.71 (m, 2H), 1.93- 2.02 (m, 2H), 2.09-2.16 (m, 1H), 2.3- 2.40 (m, 1H), 4.38 (bs, 1H), 5.29 (d,  $J$  = 2.3 Hz 1H), 7.28 (d,  $J$  = 4.55 Hz, 2H), 7.43 (d,  $J$  = 4.55 Hz, 2H).

$^{13}\text{C}$  NMR (100 MHz,  $\text{CDCl}_3$ )  $\delta$  (ppm) 20.38, 22.14, 39.01, 55.67, 69.50, 120.83, 129.06, 153.18, 219.51.

DEPT<sup>90</sup> and <sup>135</sup> deg demonstrate four methylene groups (negative) and 6 methine groups (positive two overlapped). MS(DI) = 272

**11 (S)-4-hydroxy-4-(4-nitrophenyl)butan-2-one**

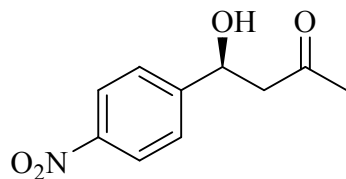

The resulting pure product was examined by  $^1\text{H}$  NMR to determine the dr. The chromatography purified aldol products were then examined by HPLC to determine their *ee*. AD-H ChiralPak Column

(4.6 ×250mm). The ee was determined by chiral HPLC (Chiral AD-H, <sup>i</sup>PrOH/n-hexane 10/90, flow rate = 0.8 mL/min, λ = 254 nm).

FT-IR (cm<sup>-1</sup>): 3430, 3068, 2922, 1700, 1414, 1281. <sup>1</sup>H NMR (500 MHz, CDCl<sub>3</sub>): δ (ppm) = 2.14 (s, 3H), 2.78 (d, *J* = 5.7 Hz, 2H), 3.96 (bs, 1H), 5.19 (dd, *J* = 6.9, 5.7 Hz, 1H), 7.46 (d, *J* = 8 Hz, 2H), 8.11 (d, *J* = 8 Hz, 2H).

<sup>13</sup>C NMR (100 MHz, CDCl<sub>3</sub>) δ = 30.61, 51.48, 68.50, 123.66, 126.36, 128.36, 130.01, 147.4, 150.04, 208.44.

DEPT<sup>90</sup> and <sup>135</sup> deg demonstrate one methylene groups (negative) and five methine groups (positive).

### 12 (*S*)-4-(4-chlorophenyl)-4-hydroxybutan-2-one

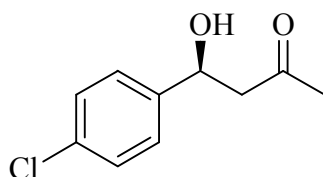

The resulting pure product was examined by <sup>1</sup>H NMR to determine the dr. The chromatography purified aldol products were then examined by HPLC to determine their ee. AD-H ChiralPak Column (4.6 ×250mm). The ee was determined by chiral HPLC (Chiral AD-H, <sup>i</sup>PrOH/n-hexane 10/90, flow rate = 0.5 mL/min, λ = 254 nm).

FT-IR (cm<sup>-1</sup>): 3425, 3077, 2919, 1703, 1515, 1340. <sup>1</sup>H NMR (500 MHz, CDCl<sub>3</sub>): δ (ppm) = 2.17(s, 3H), 2.78 (d, *J* = 4.6 Hz, 2H), 3.36 (bs, 1H), 5.10 (dd, *J* = 8.9, 3.7 Hz, 1H), 7.27-7.30 (m, 4H).

<sup>13</sup>C NMR (100 MHz, CDCl<sub>3</sub>) δ = 30.74, 51.76, 69.15, 127.00, 128.65, 133.32, 141.14, 208.93.

DEPT<sup>90</sup> and <sup>135</sup> deg demonstrate one methylene groups (negative) and five methine groups (positive).

### 13 (*S*)-4-(4-(trifluoromethyl)phenyl)-4-hydroxybutan-2-one

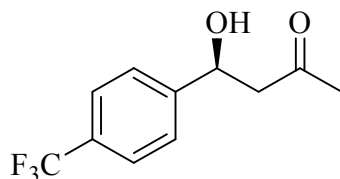

The resulting pure product was examined by <sup>1</sup>H NMR to determine the dr. The chromatography purified aldol products were then examined by HPLC to determine their ee. AD-H ChiralPak Column

(4.6 × 250mm). The ee was determined by chiral HPLC (Chiral AD-H, *i*PrOH/n-hexane 10/90, flow rate = 1 mL/min,  $\lambda$  = 254 nm).

FT-IR (cm<sup>-1</sup>): 3420, 3078, 2914, 1705, 1515, 1341. <sup>1</sup>H NMR (500 MHz, CDCl<sub>3</sub>):  $\delta$  (ppm) = 2.17 (s, 3H), 2.81 (d, *J* = 4.55 Hz, 2H), 3.54 (bs, 1H), 5.18 (dd, *J* = 7.4, 3.45 Hz, 1H), 7.44 (d, *J* = 8 Hz, 2H), 7.57 (d, *J* = 9.15 Hz, 2H).

<sup>13</sup>C NMR (100 MHz, CDCl<sub>3</sub>)  $\delta$  = 30.65, 51.45, 68.80, 125.45, 125.87, 129.61, 129.94, 146.94, 208.79.

DEPT<sup>90</sup> and <sup>135</sup> deg demonstrate one methylene groups (negative) and five methine groups (positive).

#### 14 (*S*)-4-hydroxy-4-(2-nitrophenyl)butan-2-one

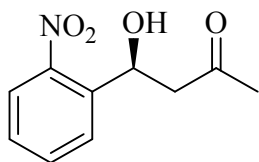

The resulting pure product was examined by <sup>1</sup>H NMR to determine the dr. The chromatography purified aldol products were then examined by HPLC to determine their *ee*. AD-H ChiralPak Column (4.6 × 250mm). The ee was determined by chiral HPLC (Chiral AD-H, *i*PrOH/n-hexane 5/95, flow rate = 0.5 mL/min,  $\lambda$  = 254 nm)

FT-IR (cm<sup>-1</sup>): 3418, 3077, 2922, 1706, 1520, 1344. <sup>1</sup>H NMR (500 MHz, CDCl<sub>3</sub>):  $\delta$  (ppm) = 2.21 (s, 3H), 2.70 (dd, *J* = 17.7, 10.3 Hz, 2H), 3.7 (bs, 1H), 5.65 (dd, *J* = 9.15, 2.3 Hz, 1H), 7.41 (d, *J* = 8 Hz, 2H), 7.64 (t, *J* = 8 Hz, 1H), 7.86 (d, *J* = 8 Hz, 1H), 7.93 (d, *J* = 8 Hz, 1H)

<sup>13</sup>C NMR (100 MHz, CDCl<sub>3</sub>)  $\delta$  = 30.41, 51.04, 65.57, 124.41, 128.15, 128.25, 133.80, 138.37, 147.11, 208.80.

DEPT<sup>90</sup> and <sup>135</sup> deg demonstrate one methylene groups (negative) and five methine groups (positive).

#### 15 (*S*)-4-(4-bromophenyl)-4-hydroxybutan-2-one

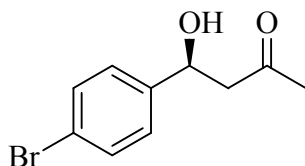

The resulting pure product was examined by  $^1\text{H}$  NMR to determine the dr. The chromatography purified aldol products were then examined by HPLC to determine their *ee*. AD-H ChiralPak Column ( $4.6 \times 250\text{mm}$ ). The *ee* was determined by chiral HPLC (Chiral AD-H,  $i\text{PrOH/n-hexane } 10/90$ , flow rate =  $1 \text{ mL/min}$ ,  $\lambda = 254 \text{ nm}$ ).

FT-IR ( $\text{cm}^{-1}$ ): 3418, 2921, 2855, 1705, 1490, 1352.  $^1\text{H}$  NMR (500 MHz,  $\text{CDCl}_3$ ):  $\delta$  (ppm) = 2.18 (s, 3H), 2.81 (d,  $J = 4.55 \text{ Hz}$ , 2H), 3.69 (bs, 1H), 5.22 (dd,  $J = 7.4, 3.45 \text{ Hz}$ , 1H), 7.49 (d,  $J = 8 \text{ Hz}$ , 2H), 8.15(d,  $J = 9.15 \text{ Hz}$ , 2H).

$^{13}\text{C}$  NMR (100 MHz,  $\text{CDCl}_3$ )  $\delta = 30.65, 51.45, 68.80, 123.68, 126.36, 147.21, 150.01, 208.47$ .

DEPT $^{90}$  and  $^{135}$  deg demonstrate one methylene groups (negative) and five methine groups (positive).

➤ **NMR spectra of corresponding aldol compounds**

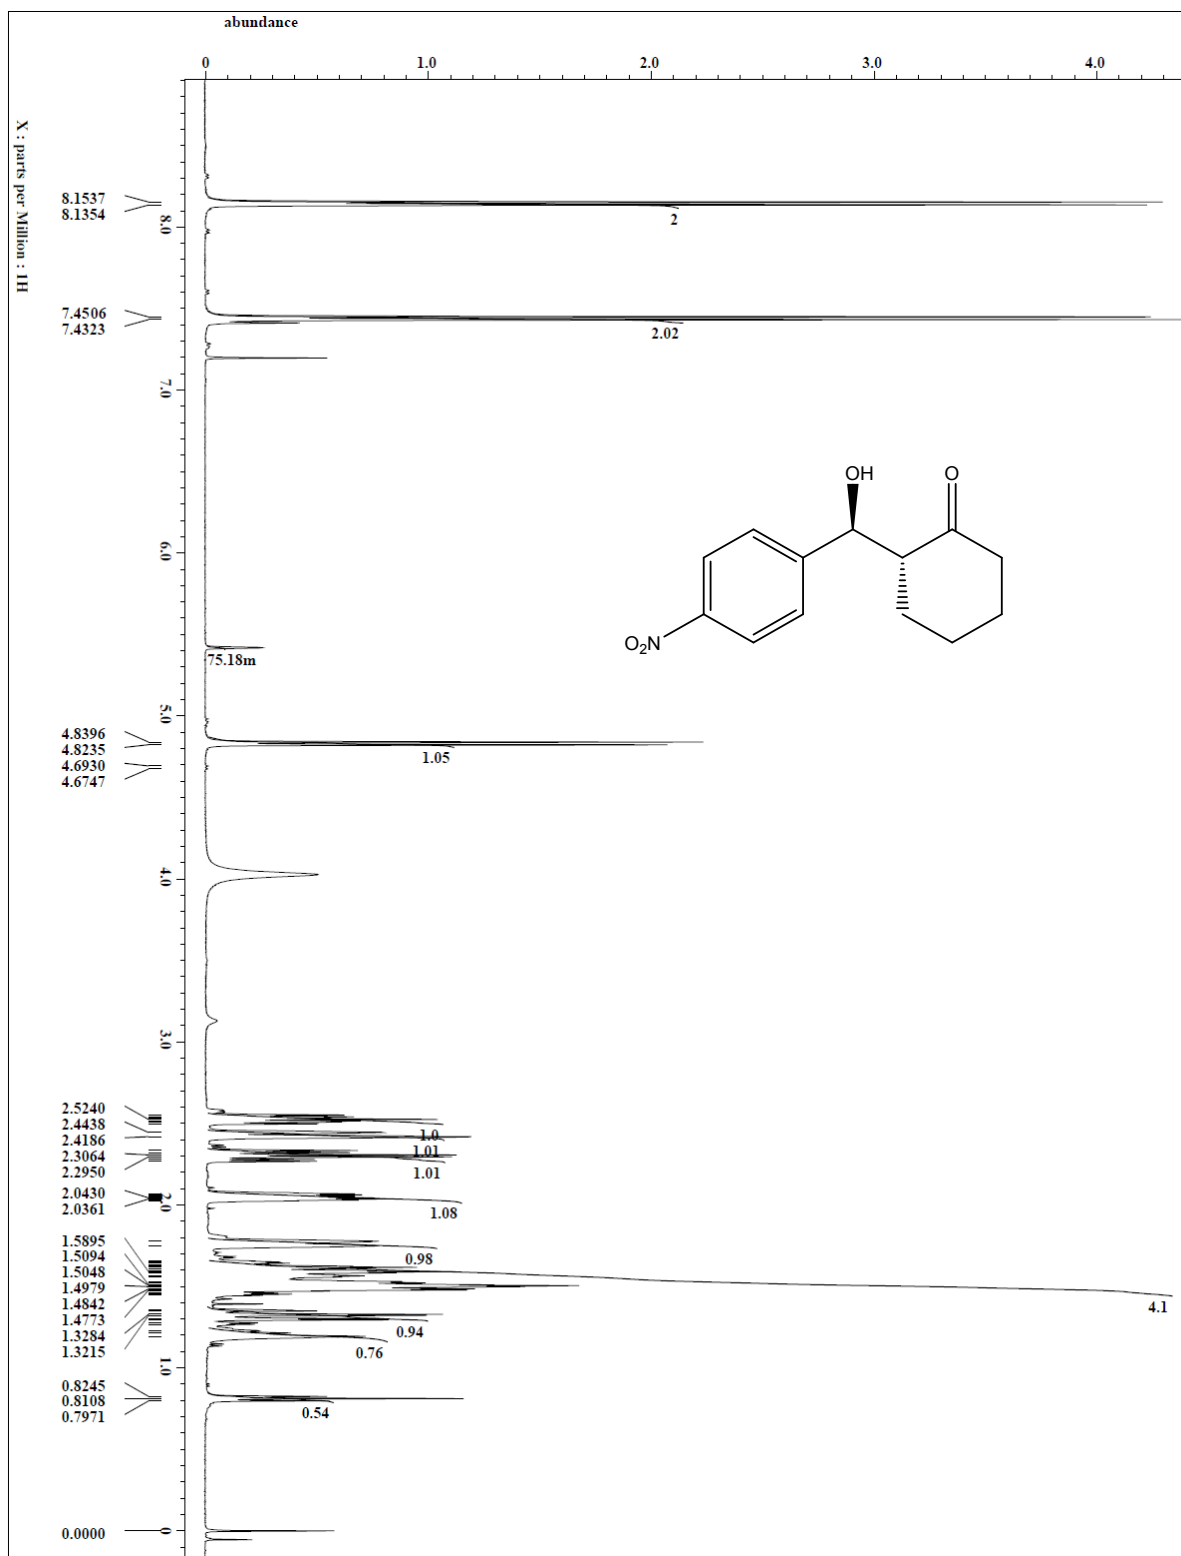



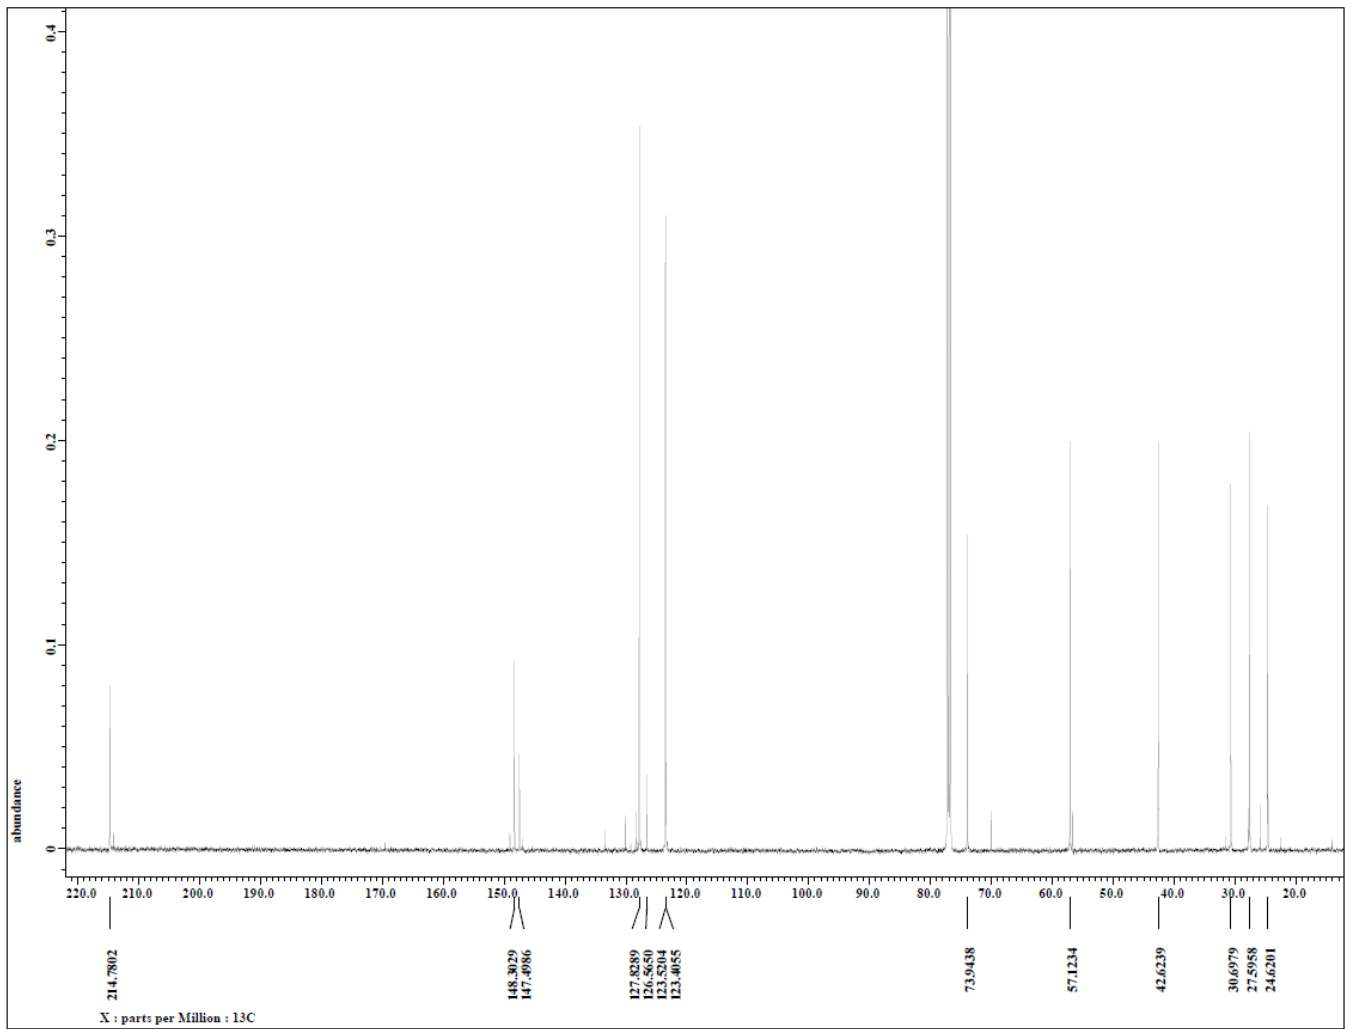

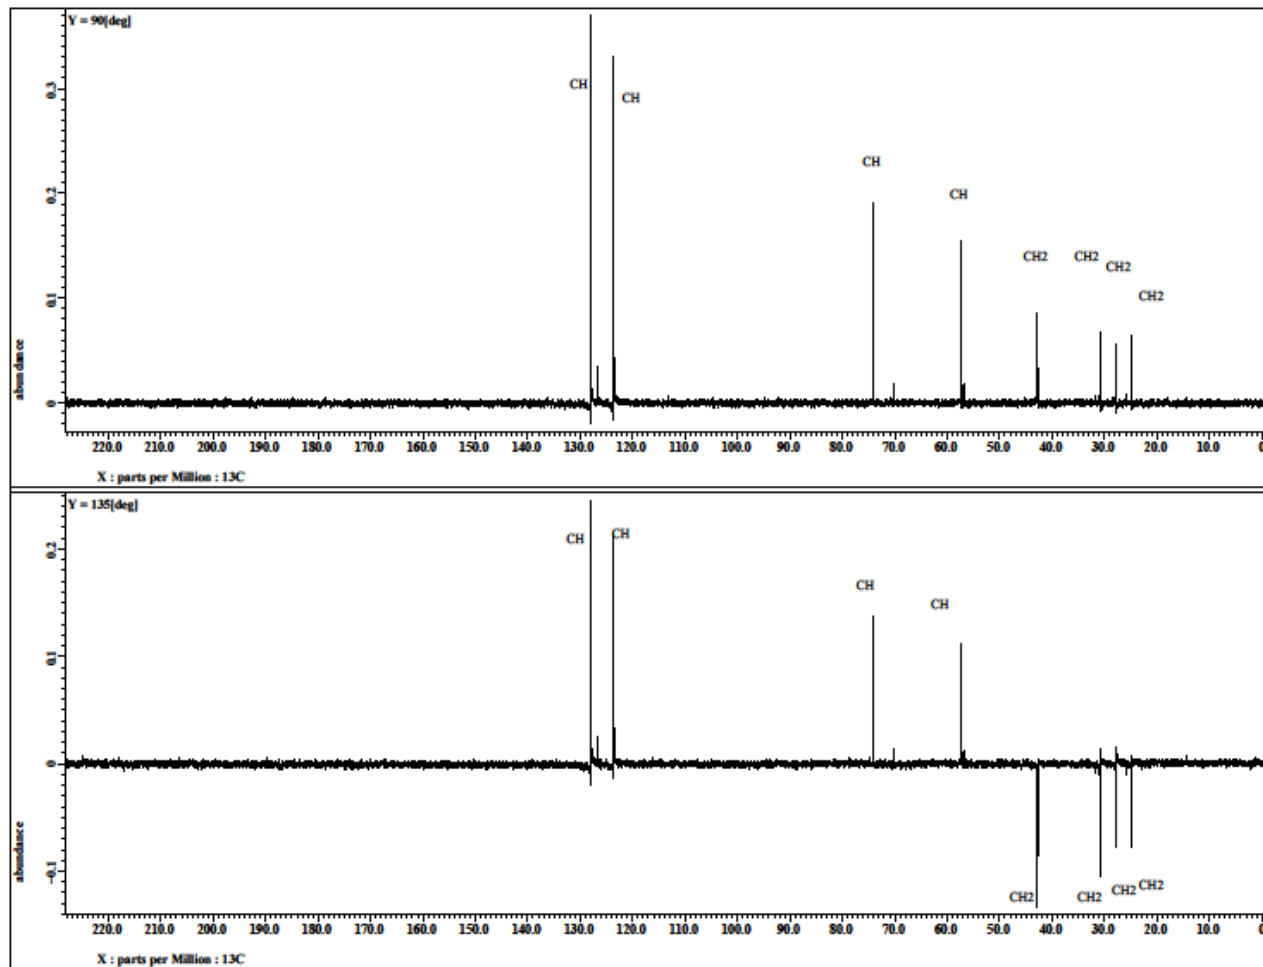

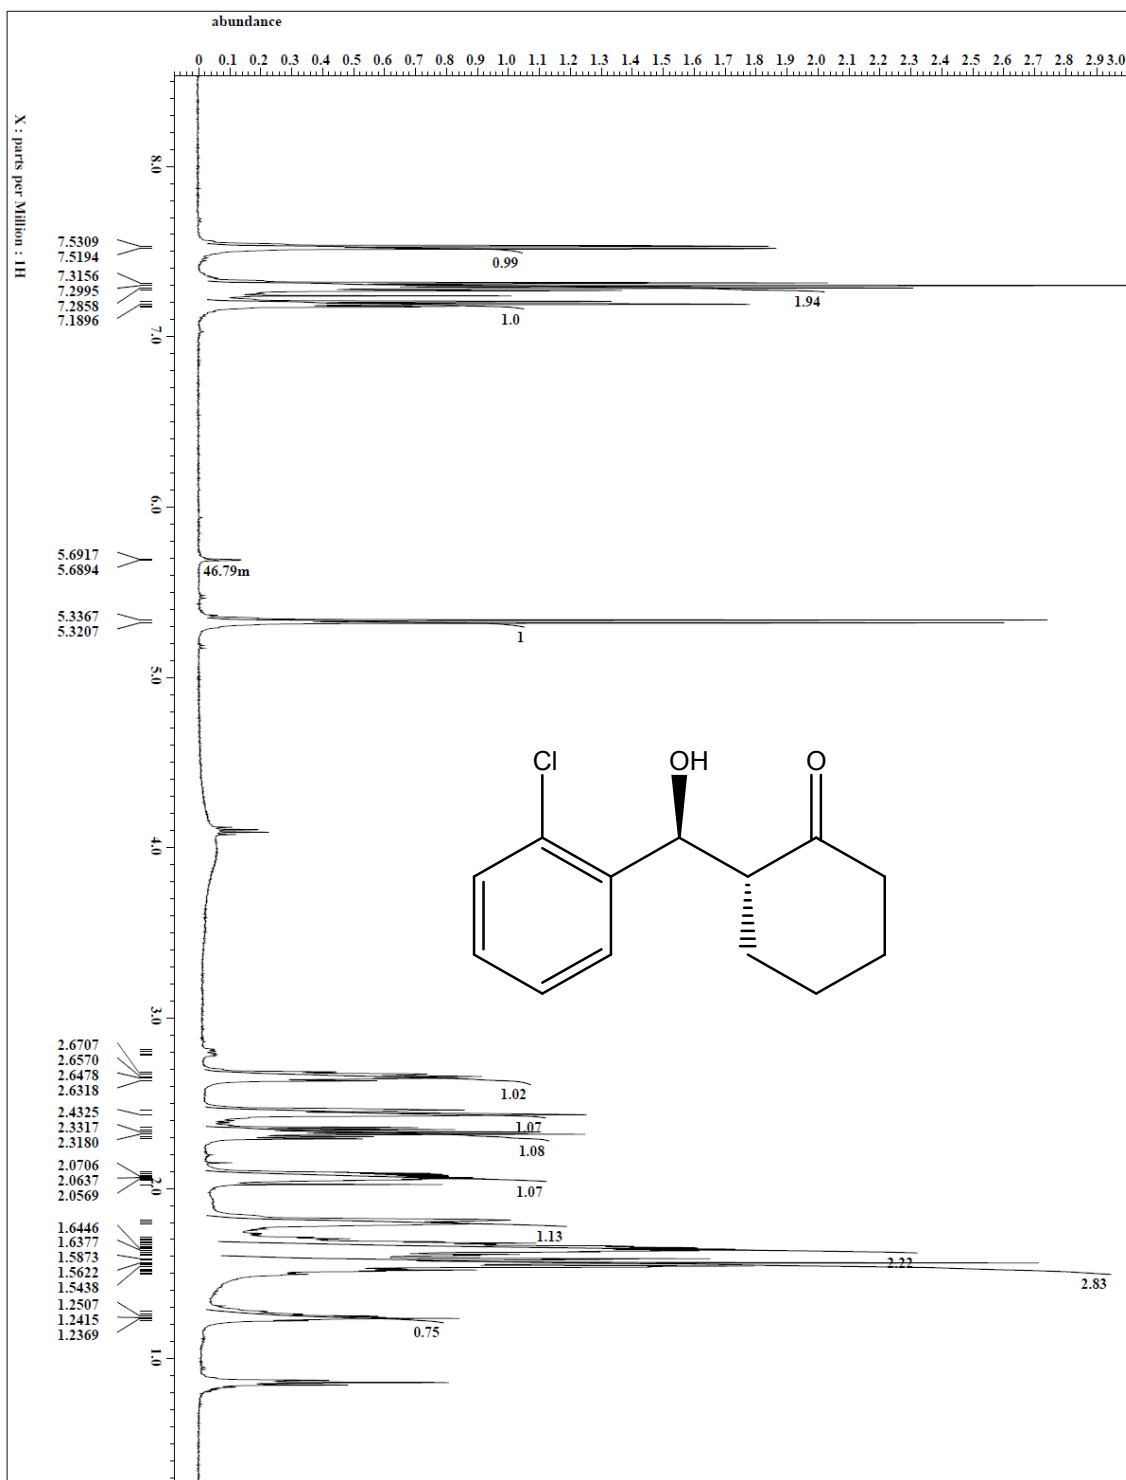

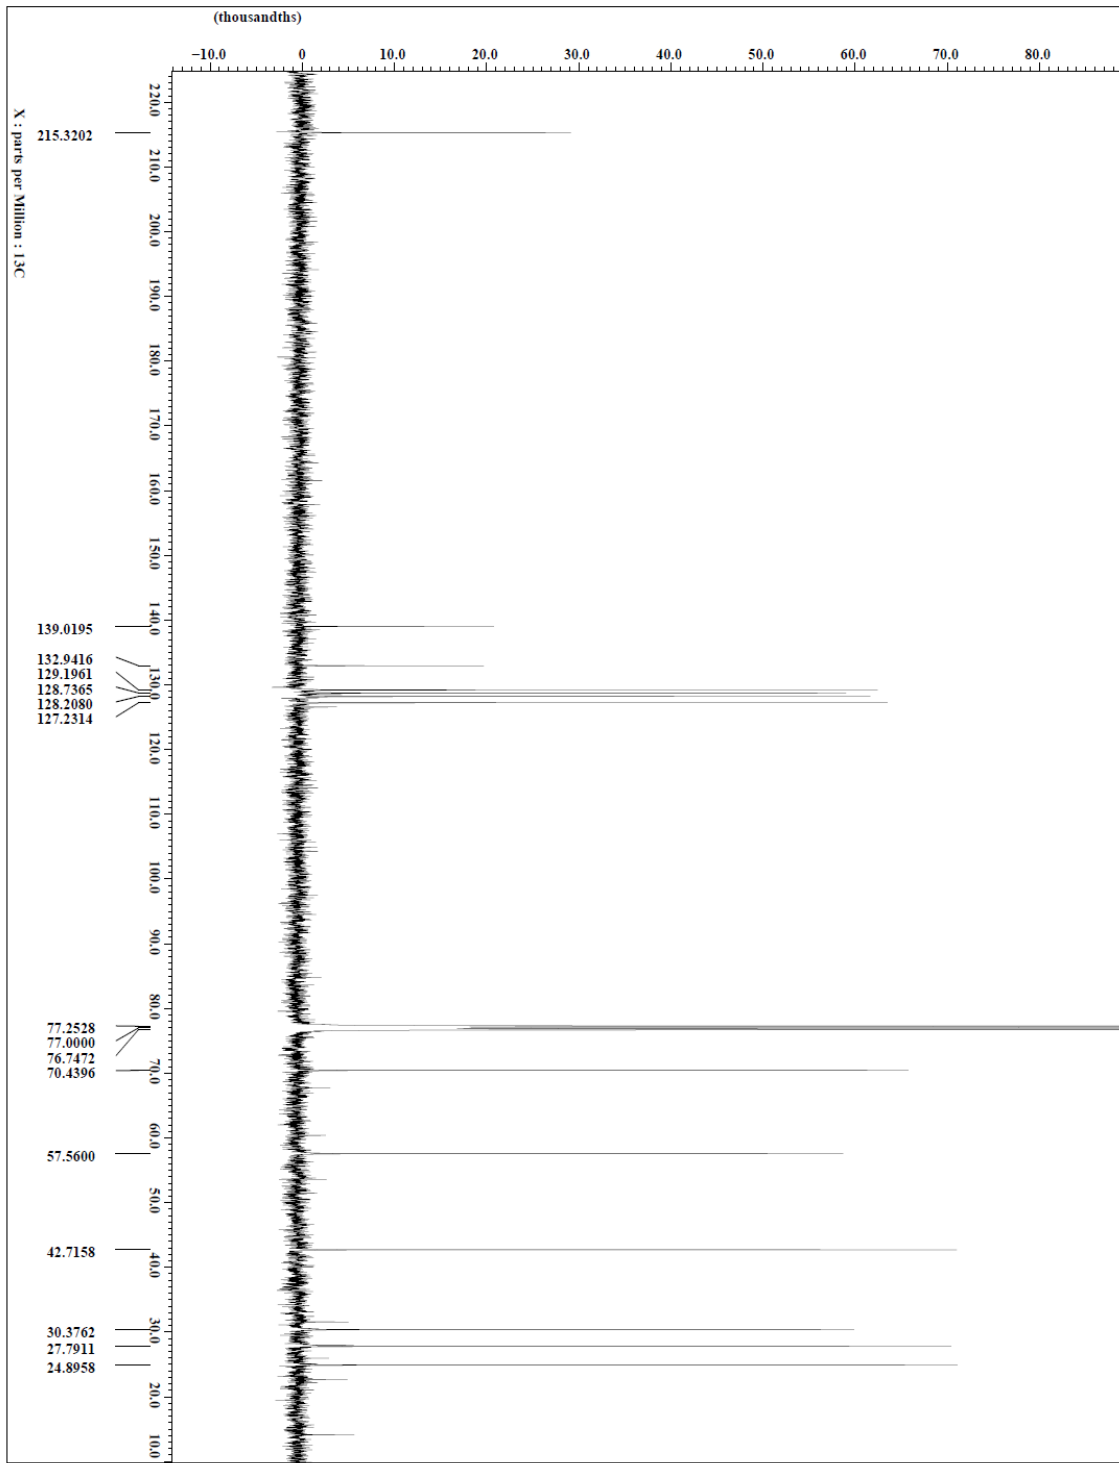

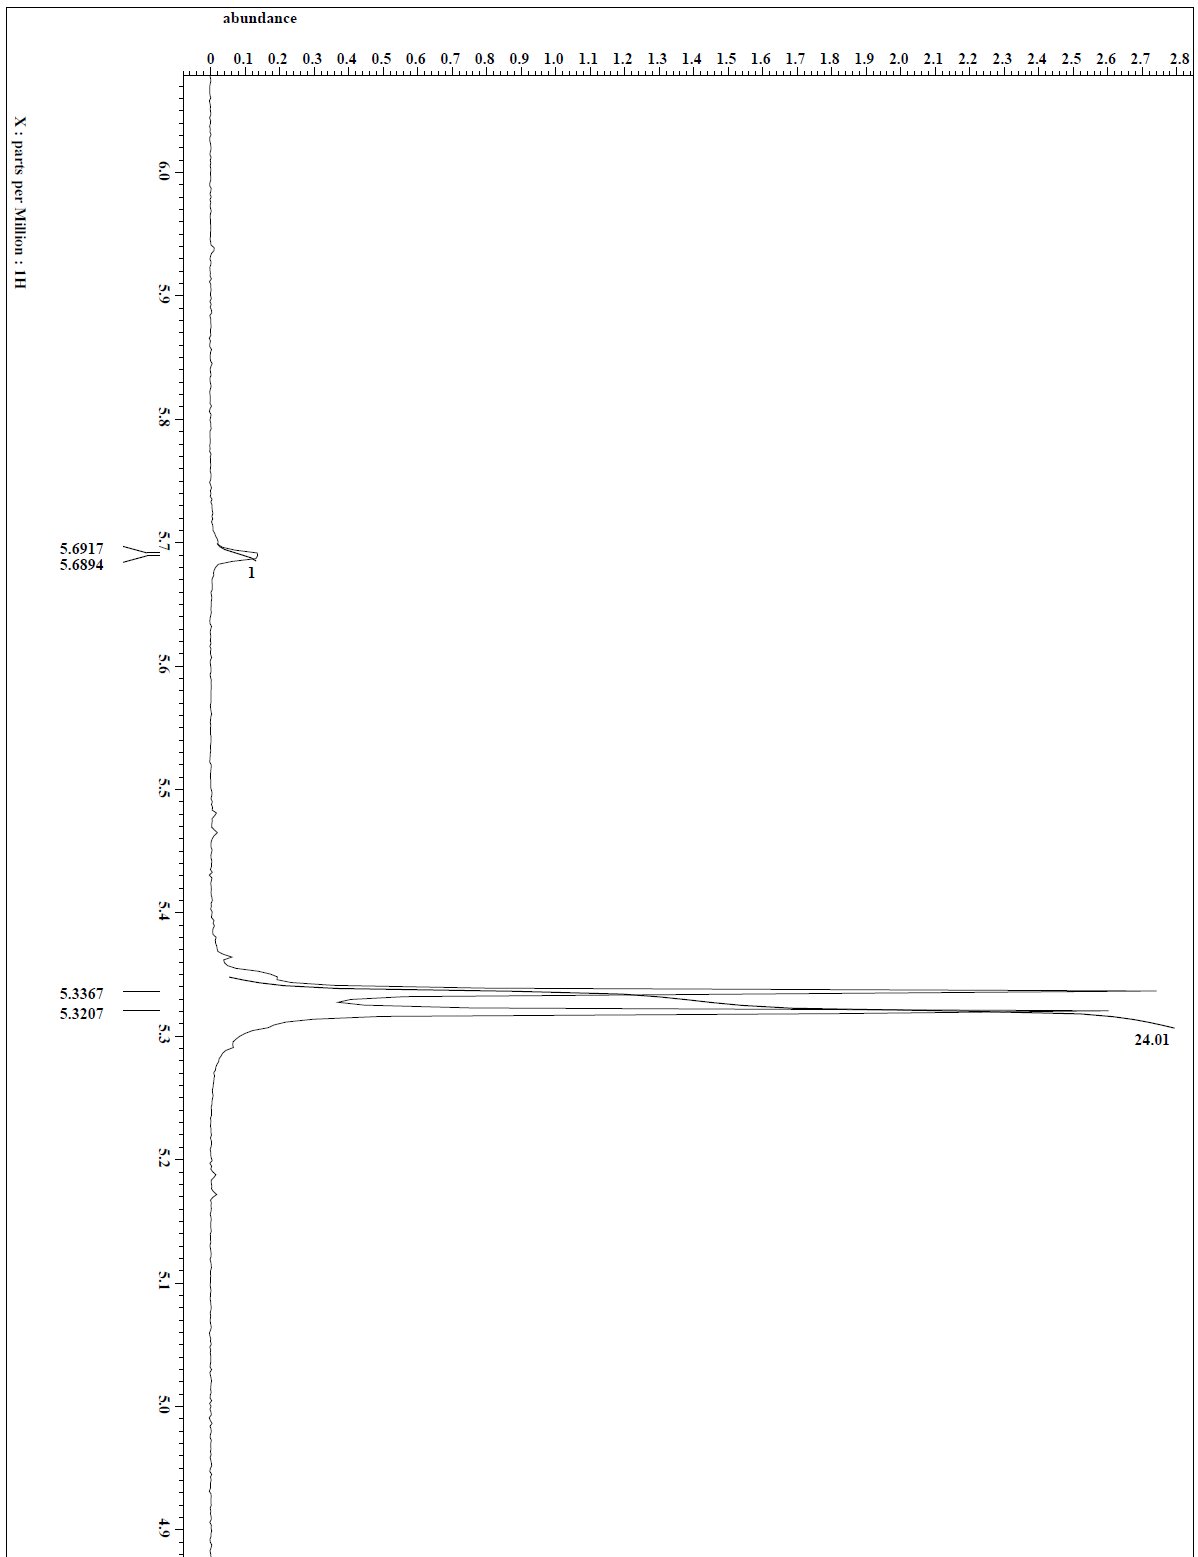

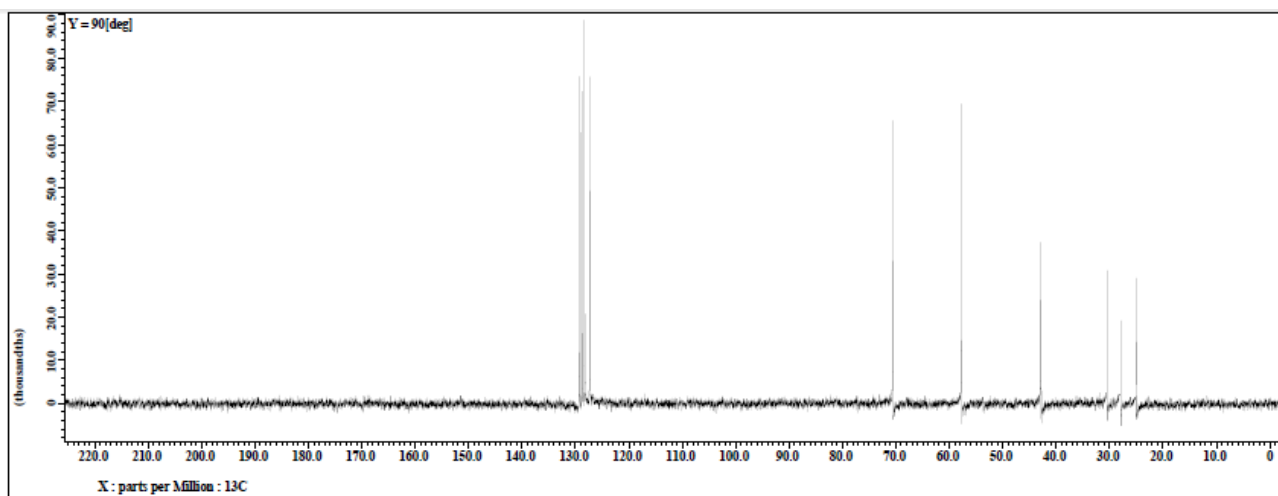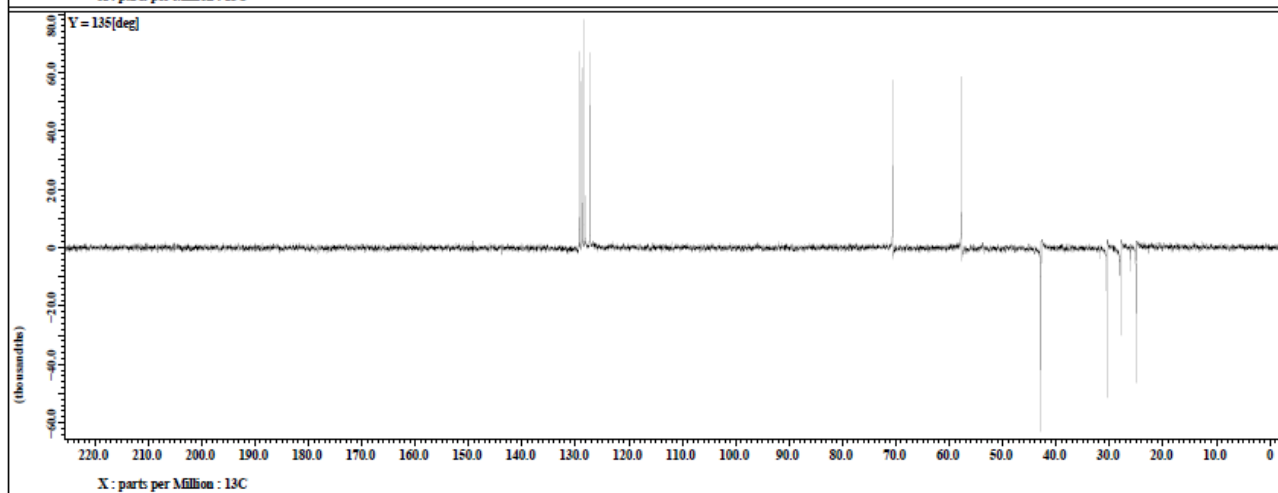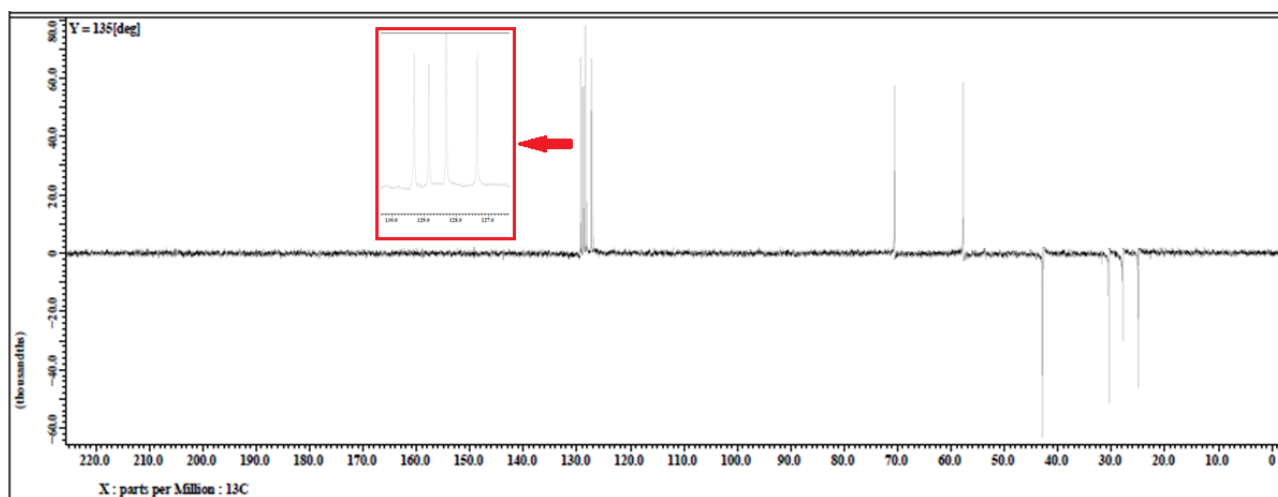

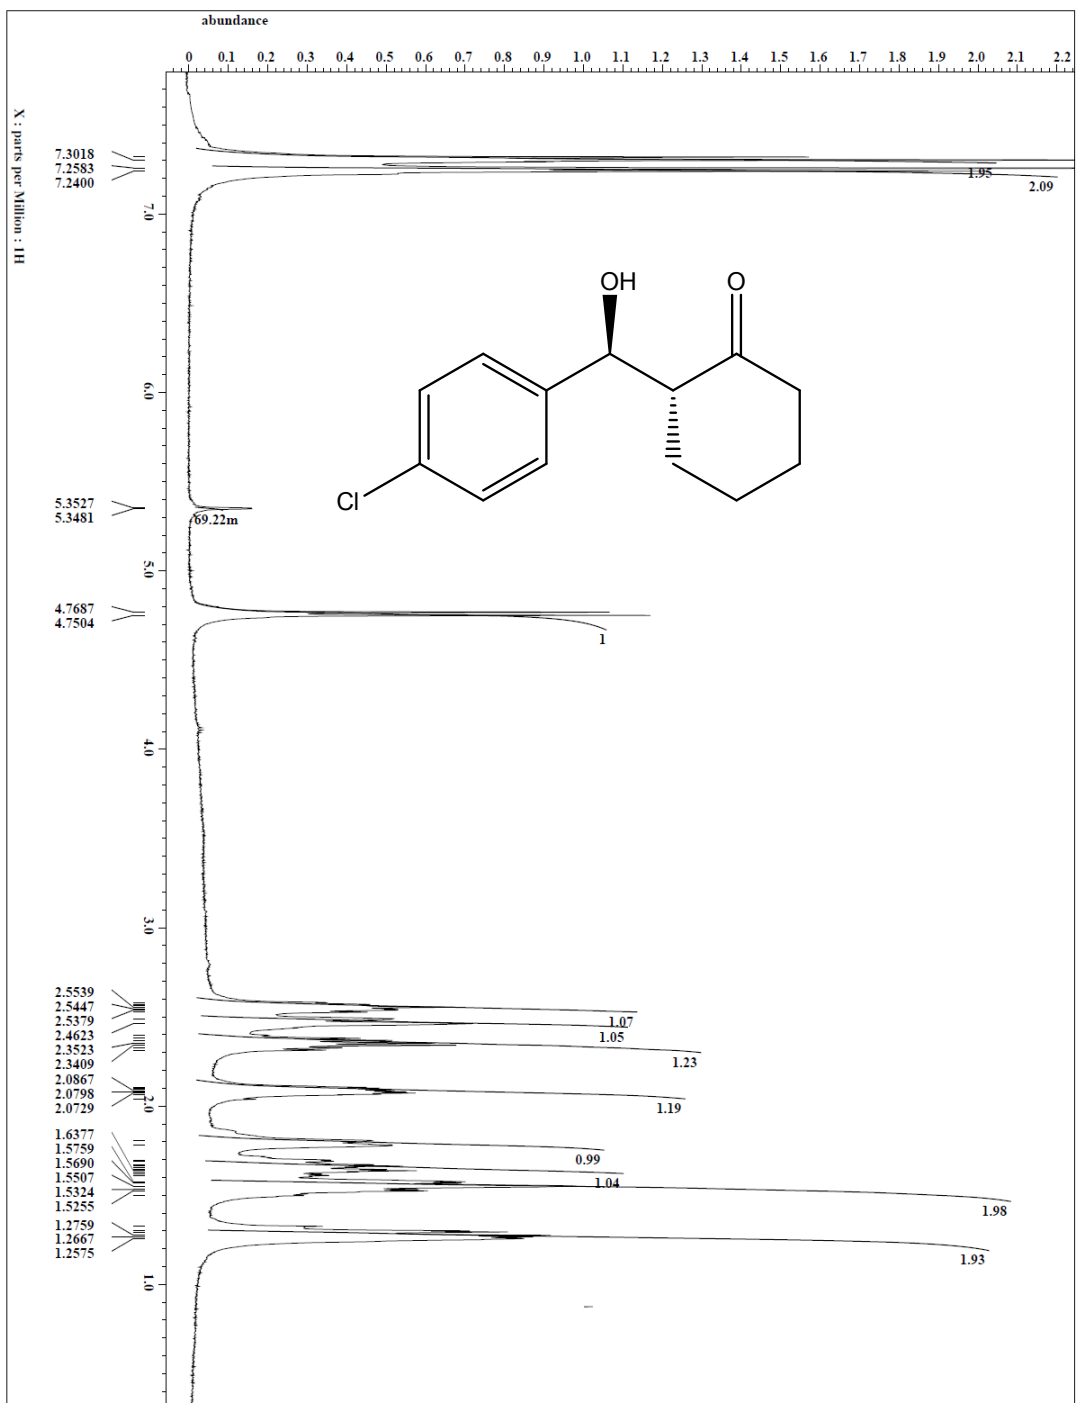

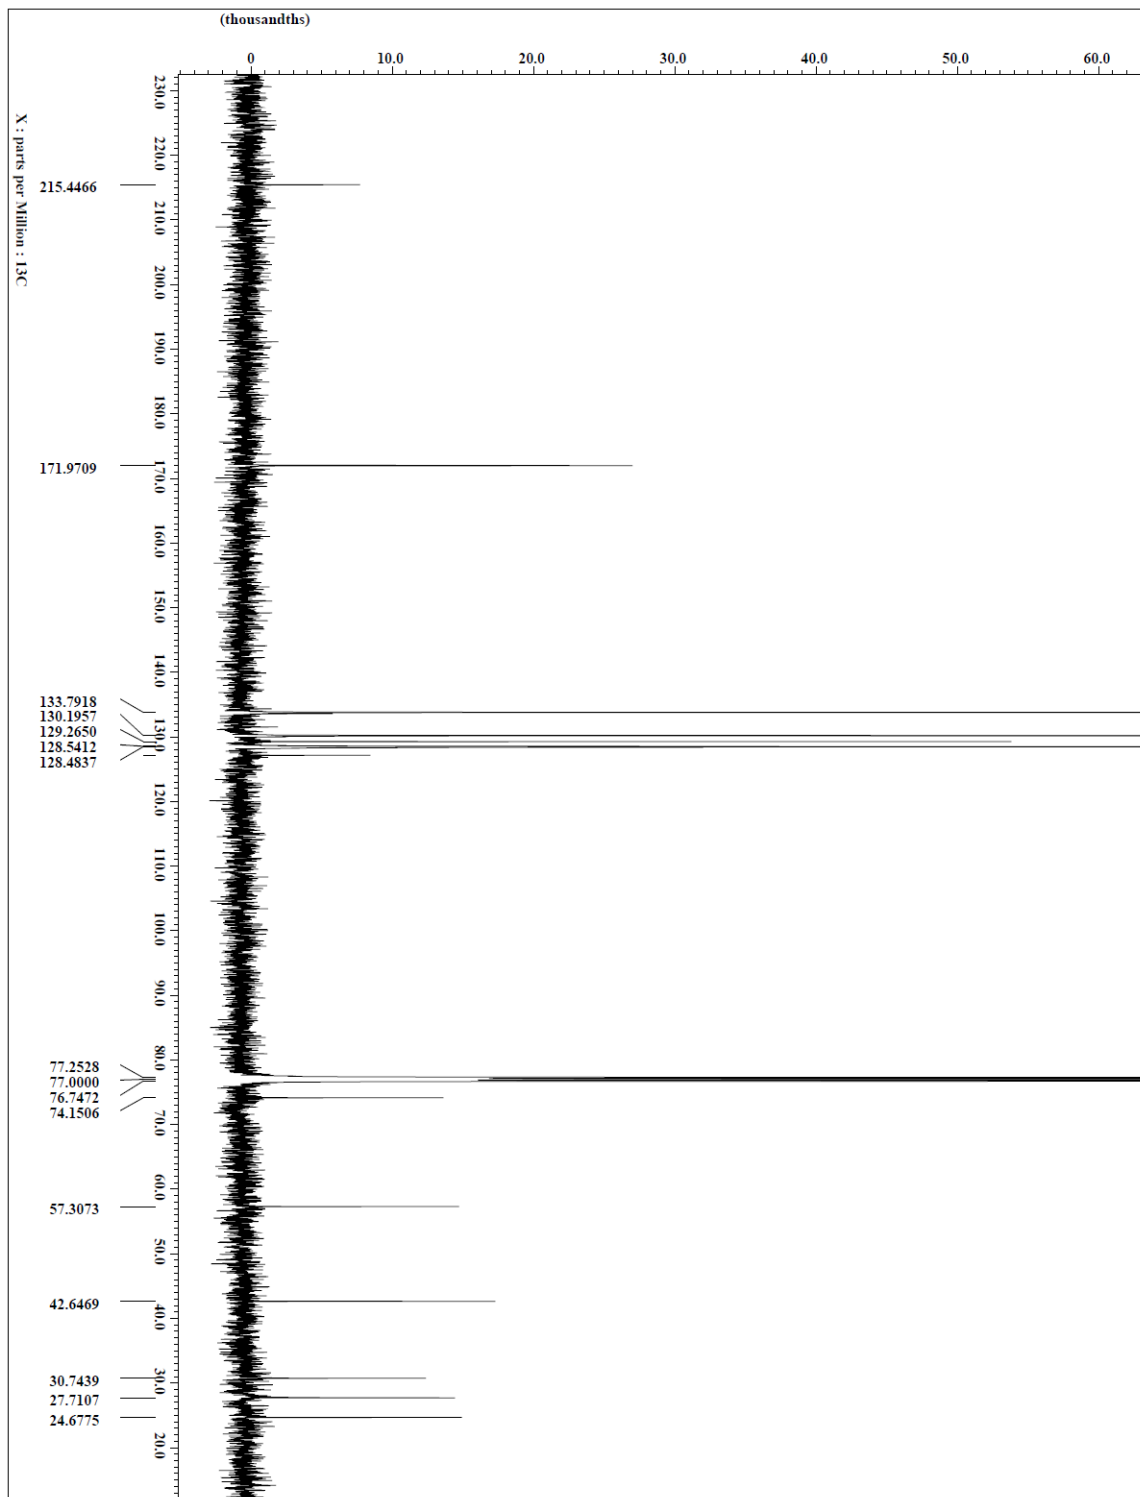



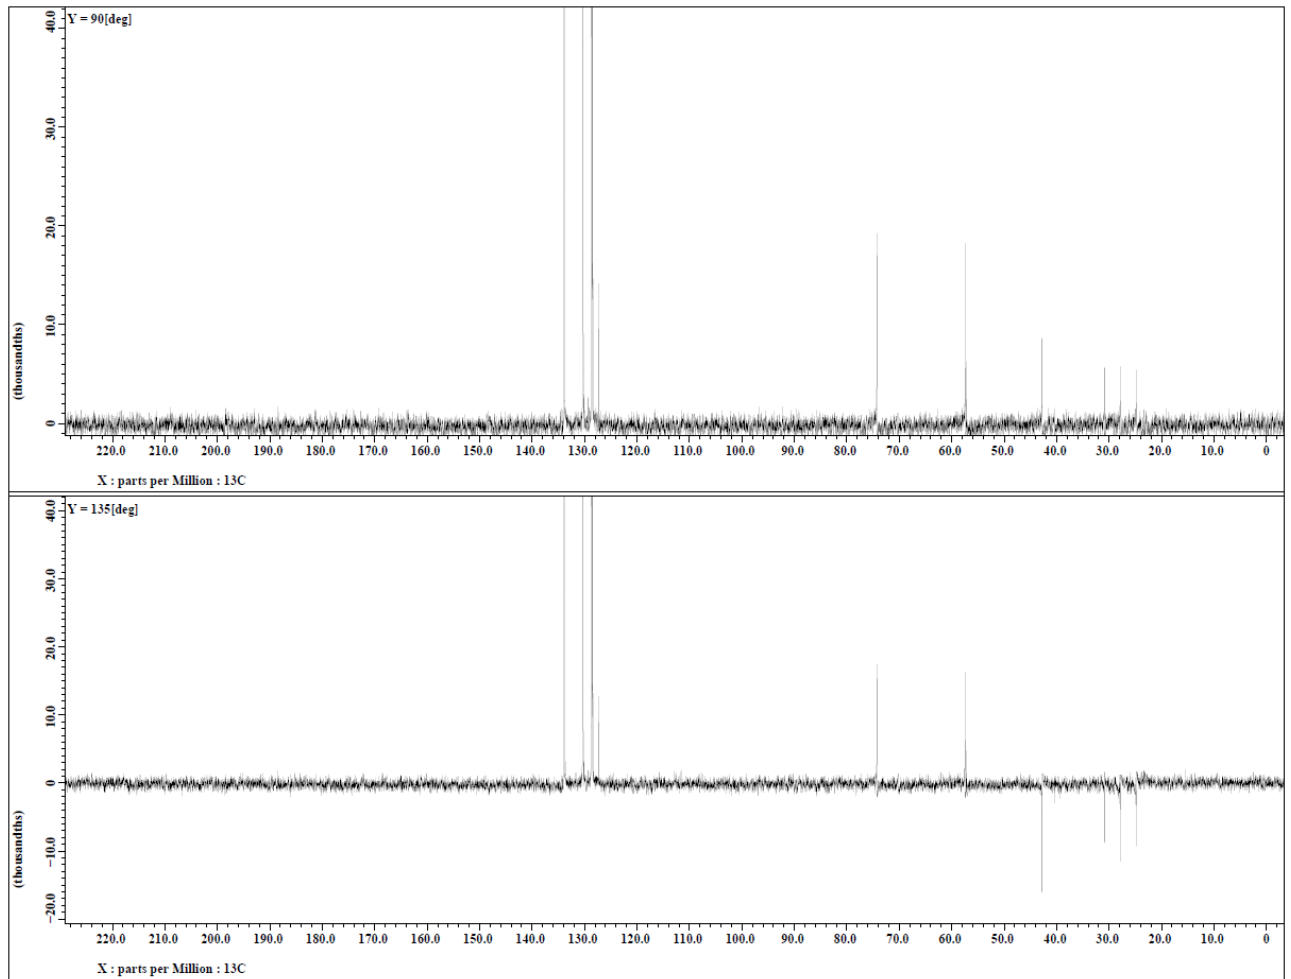

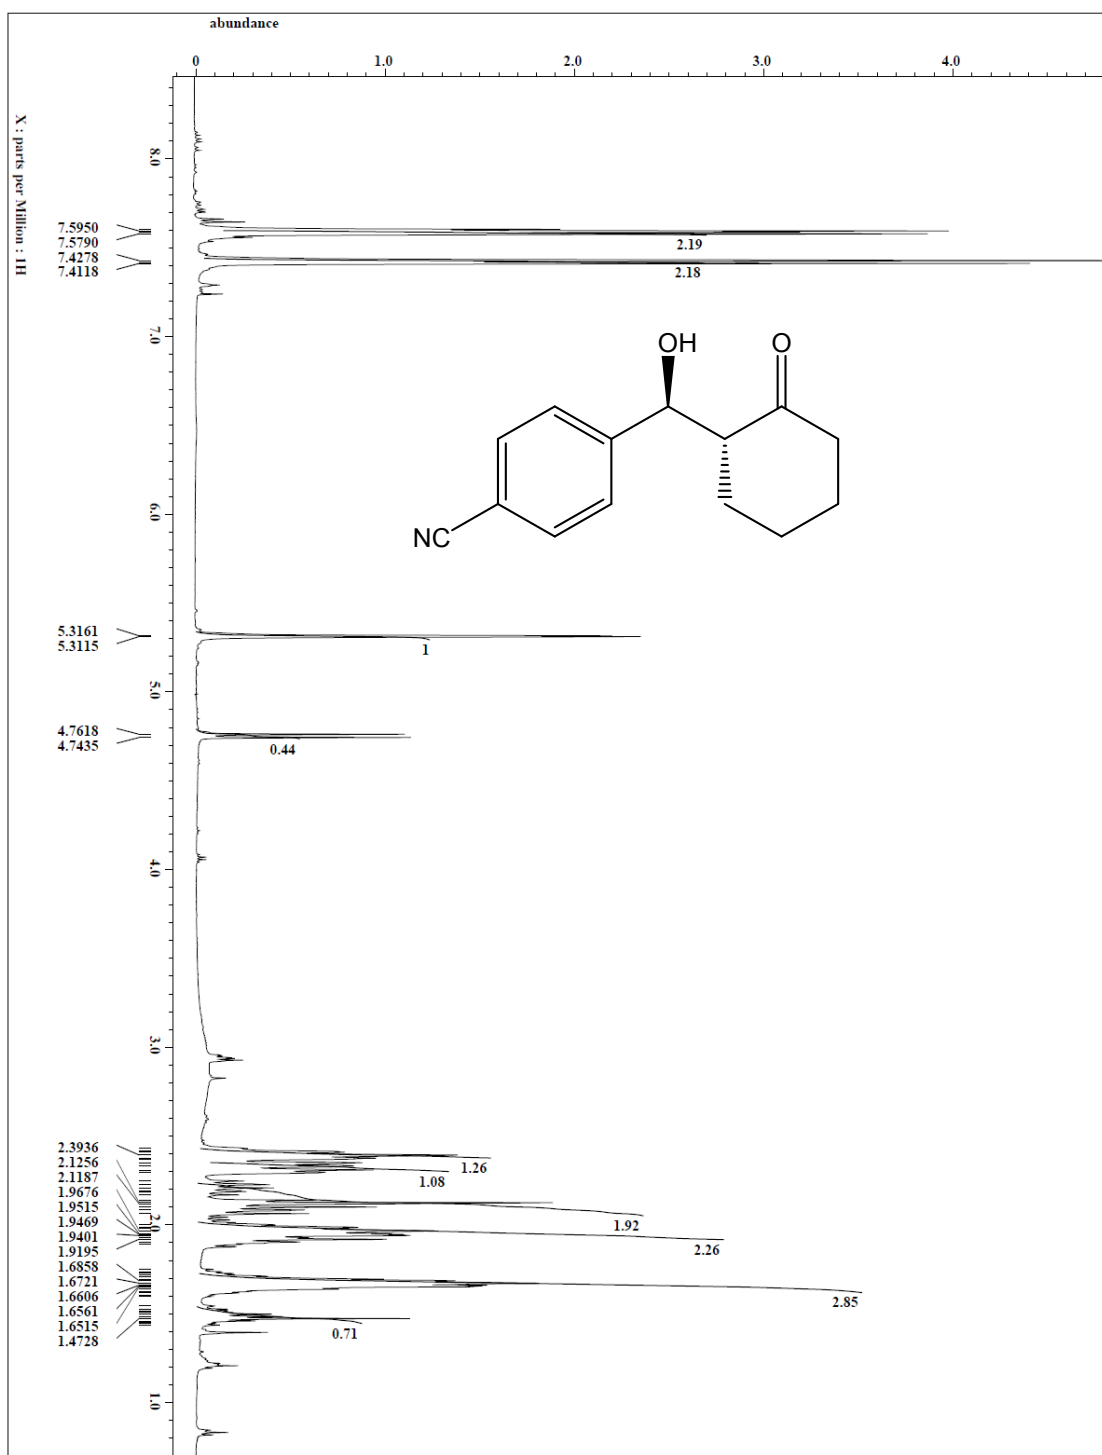

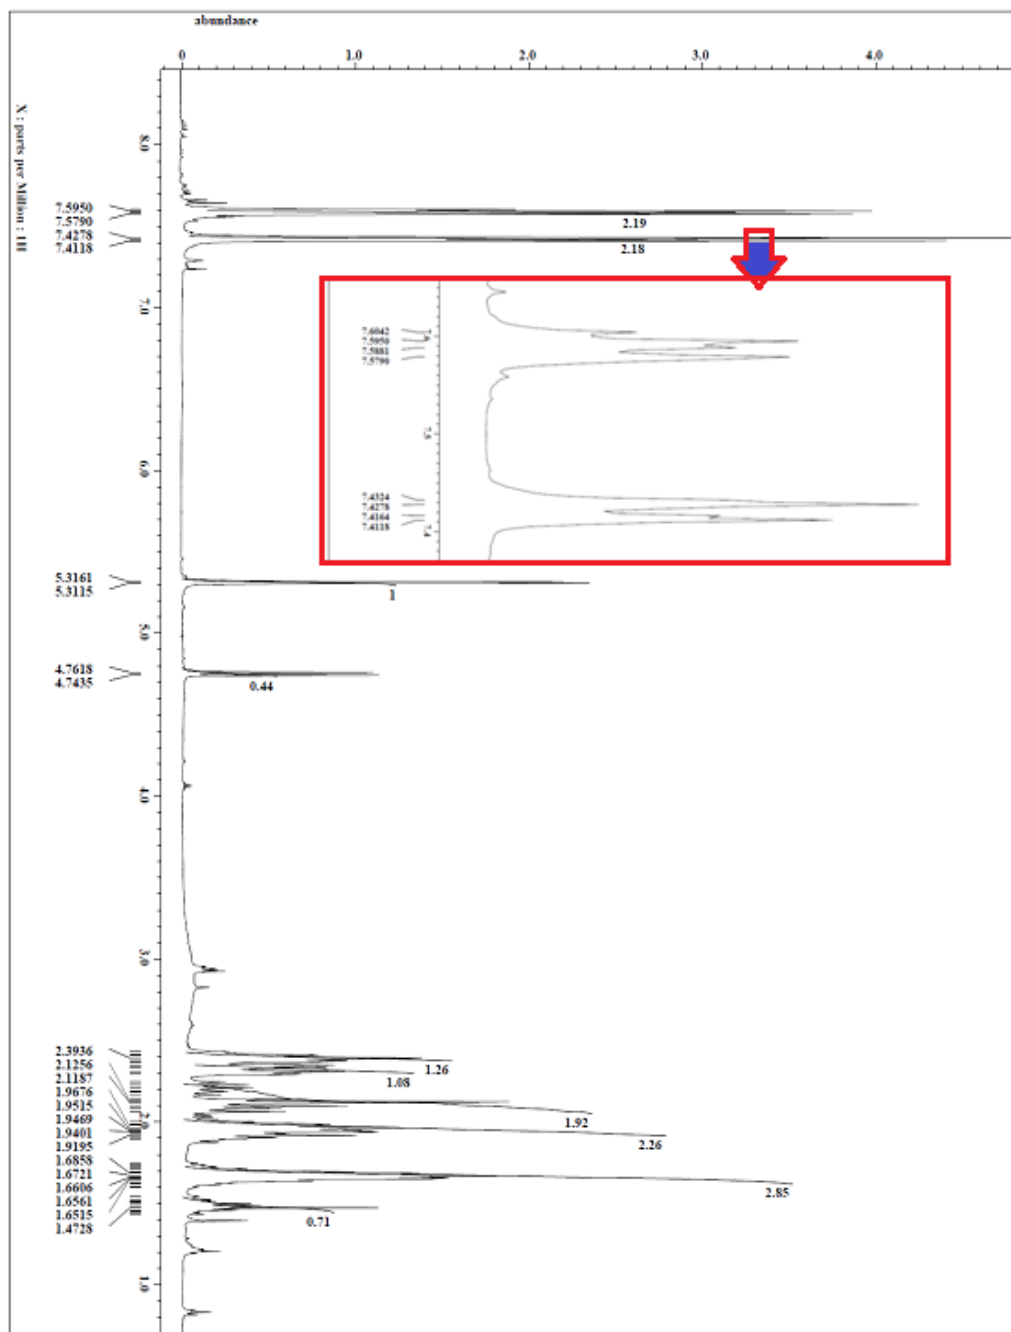

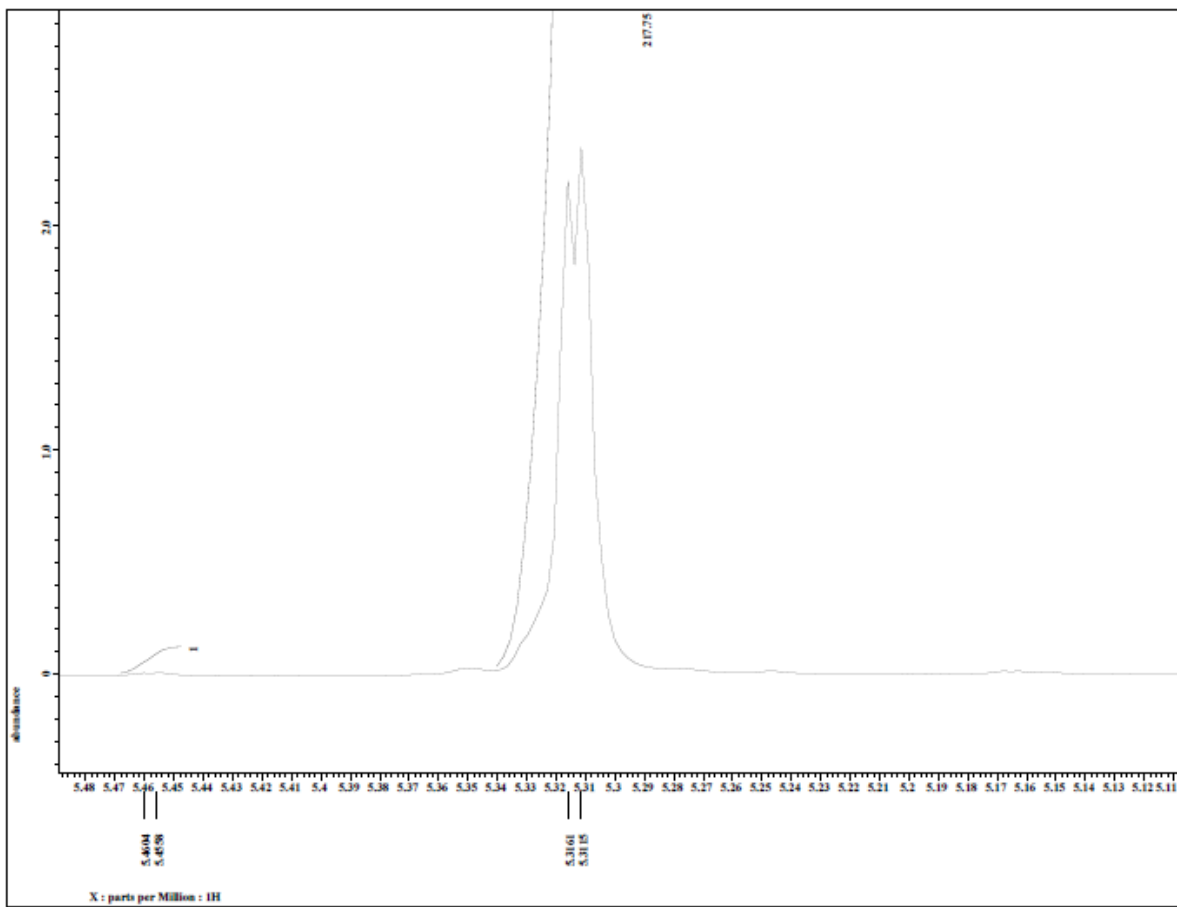

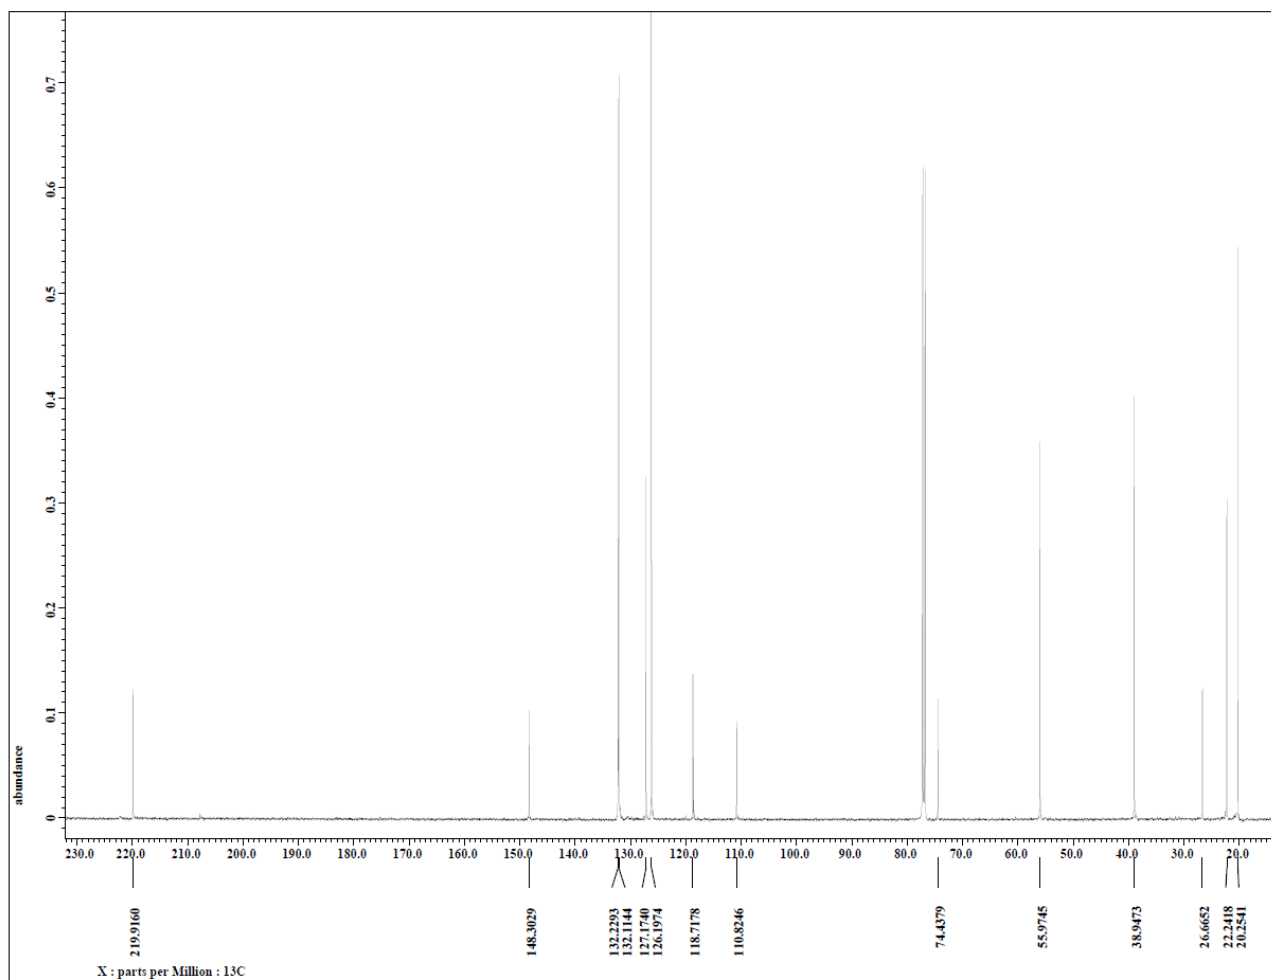

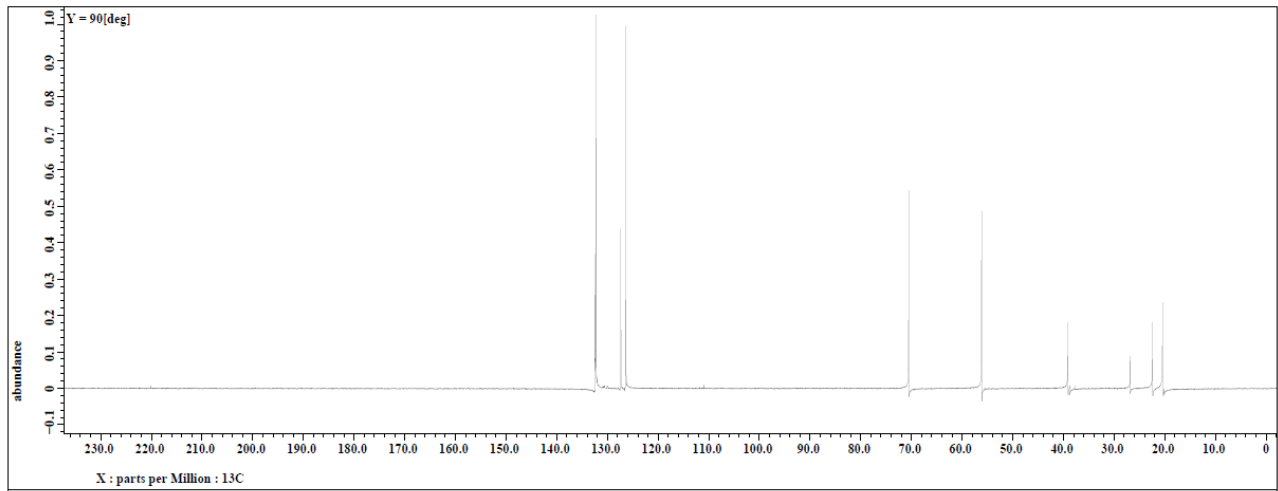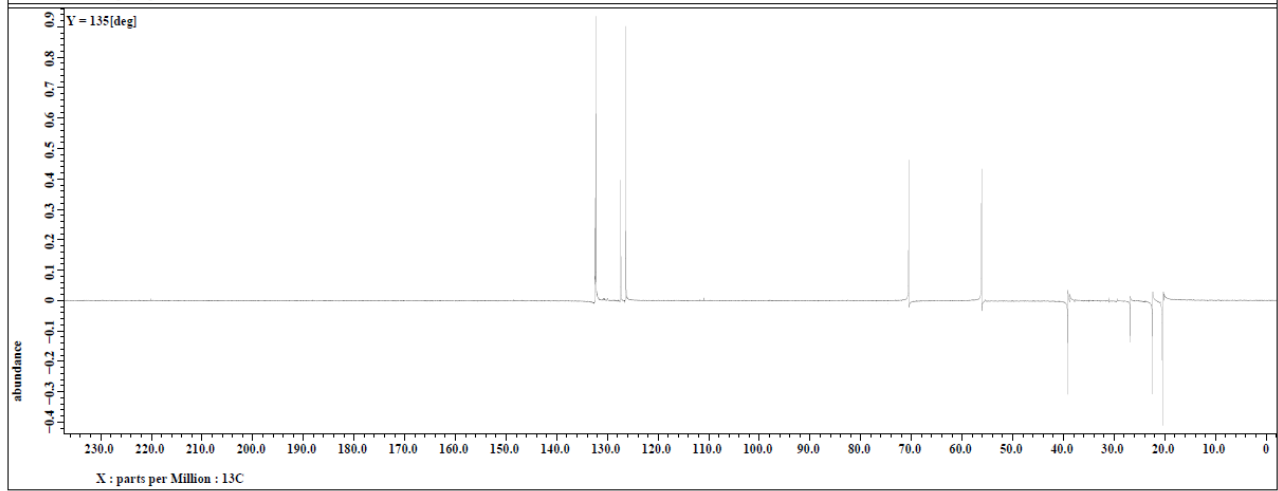

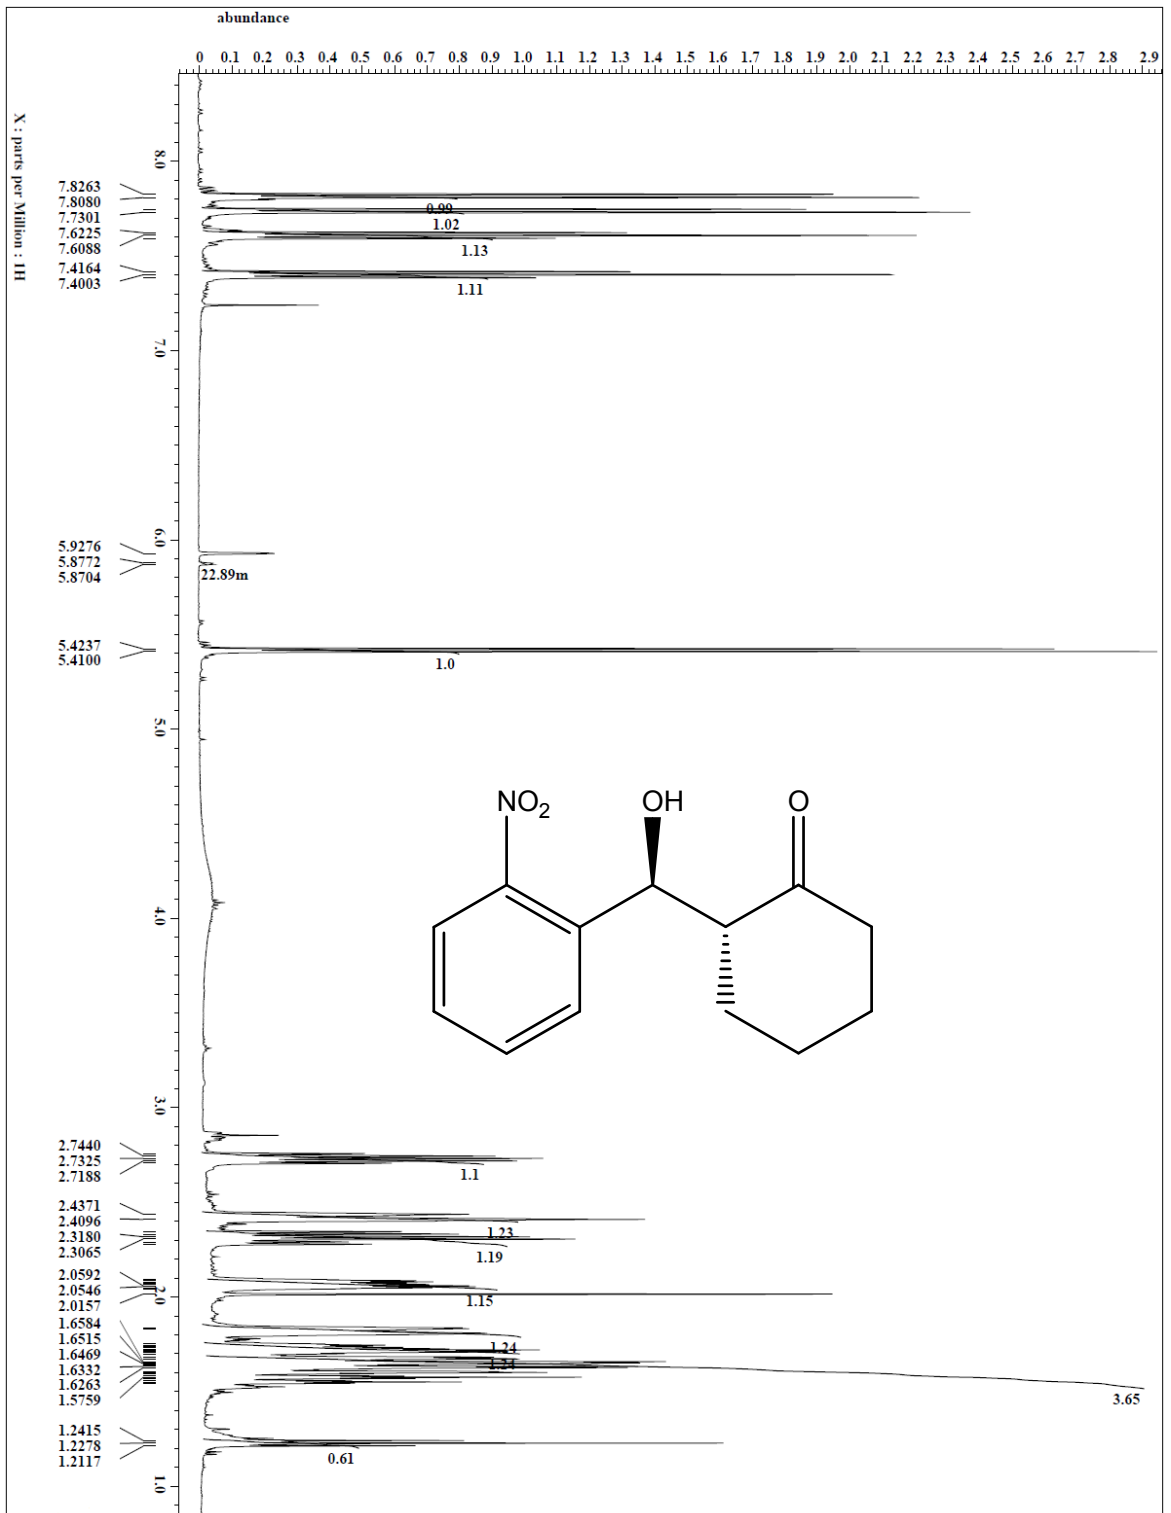

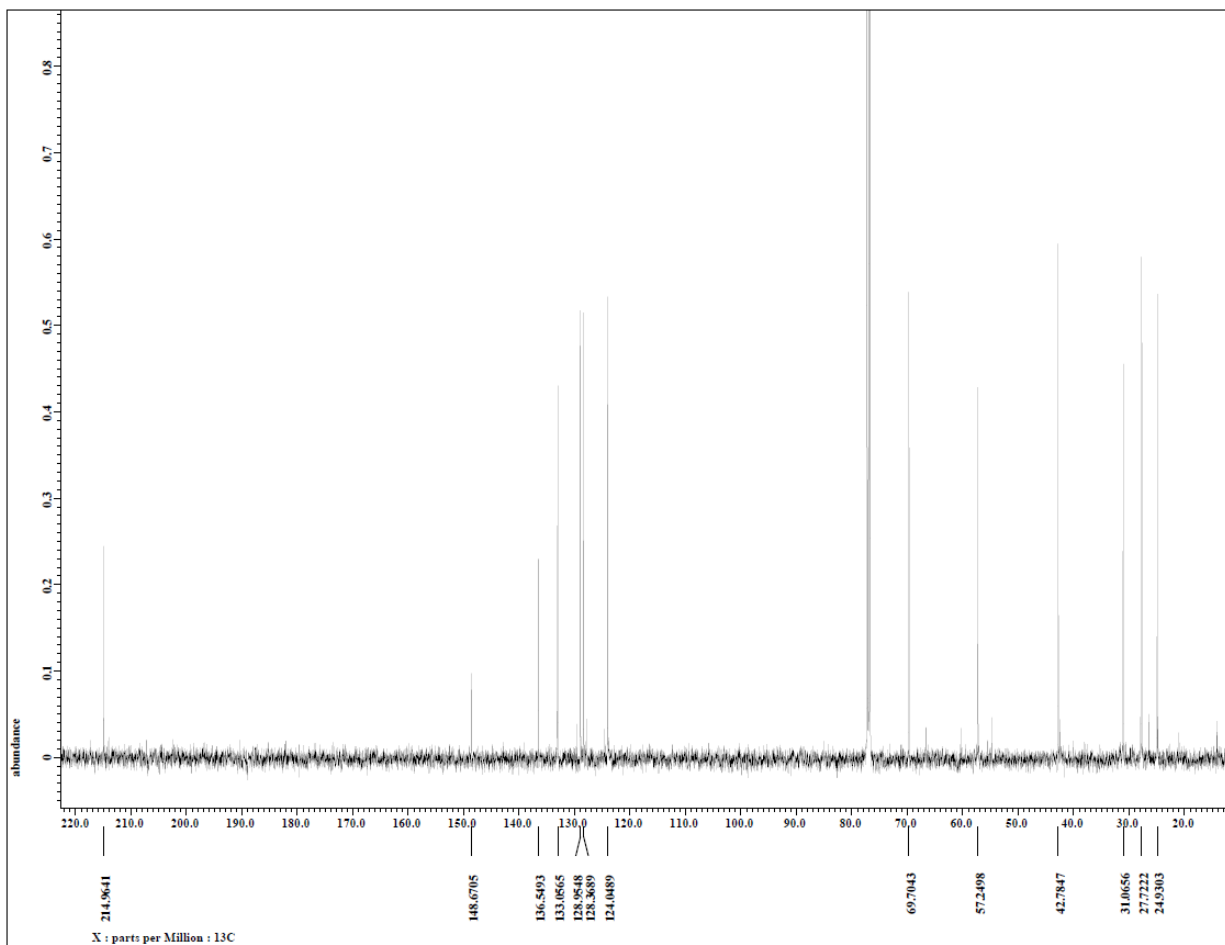



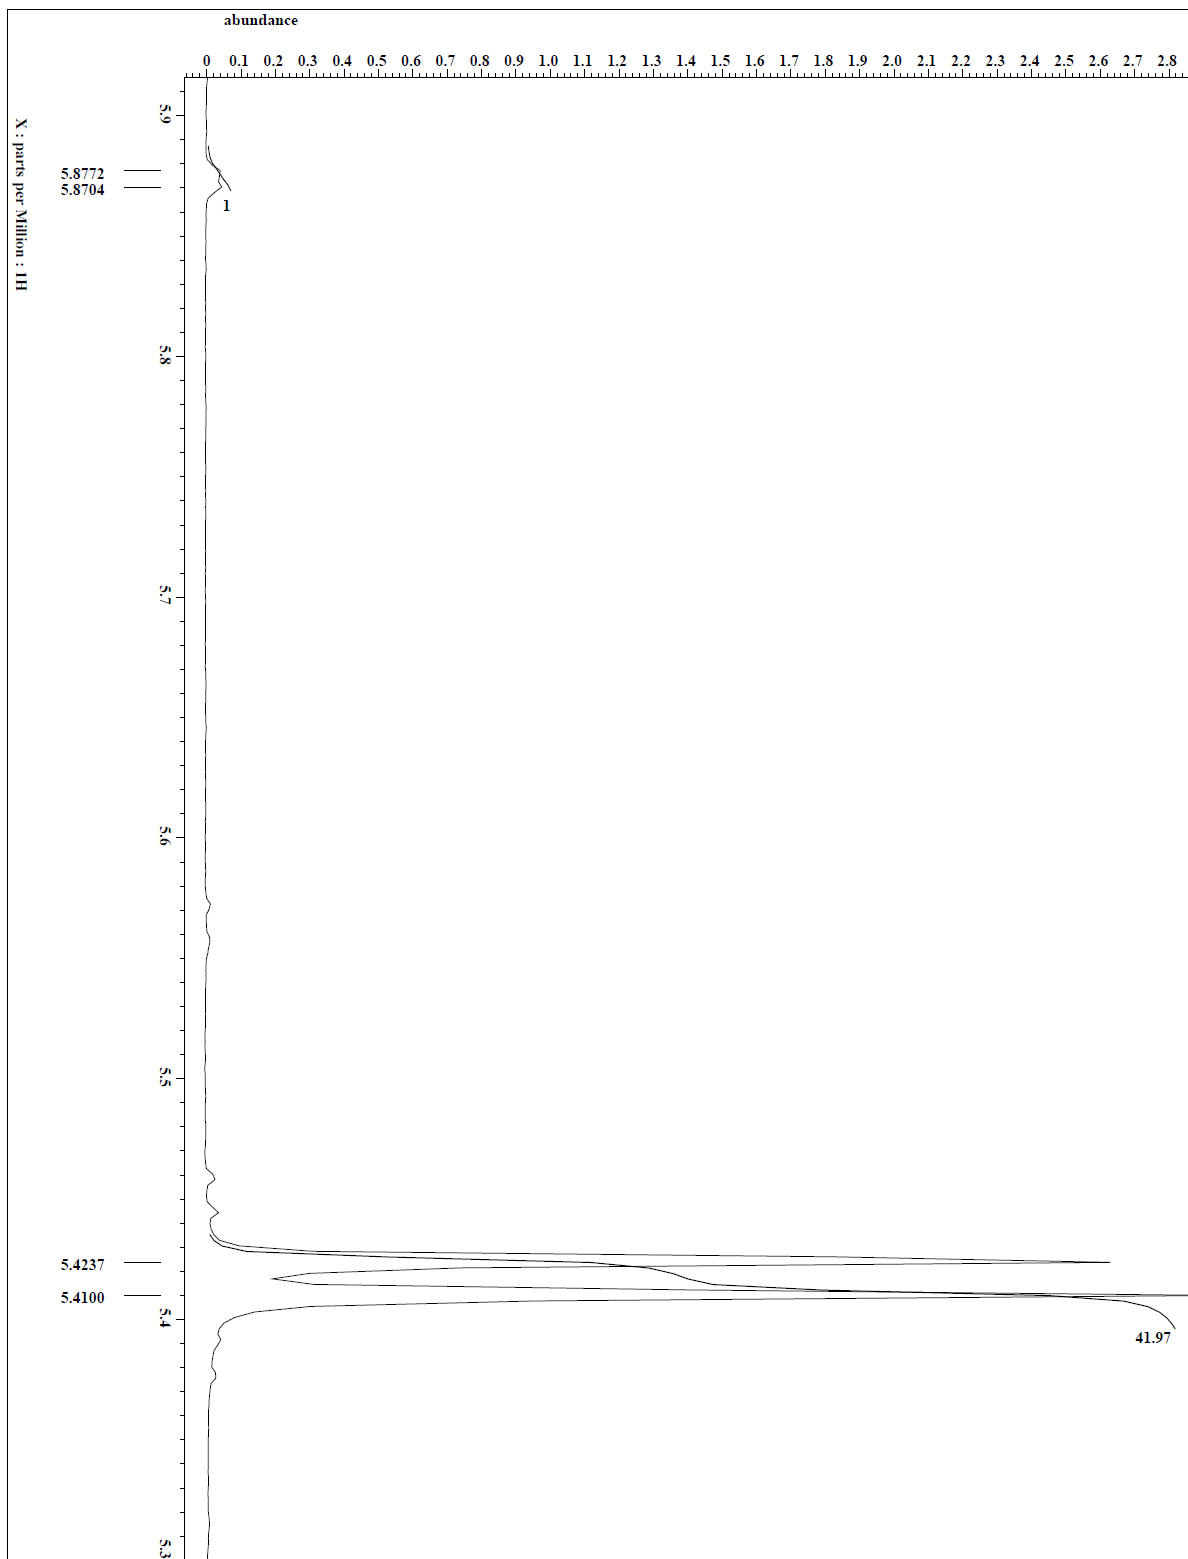

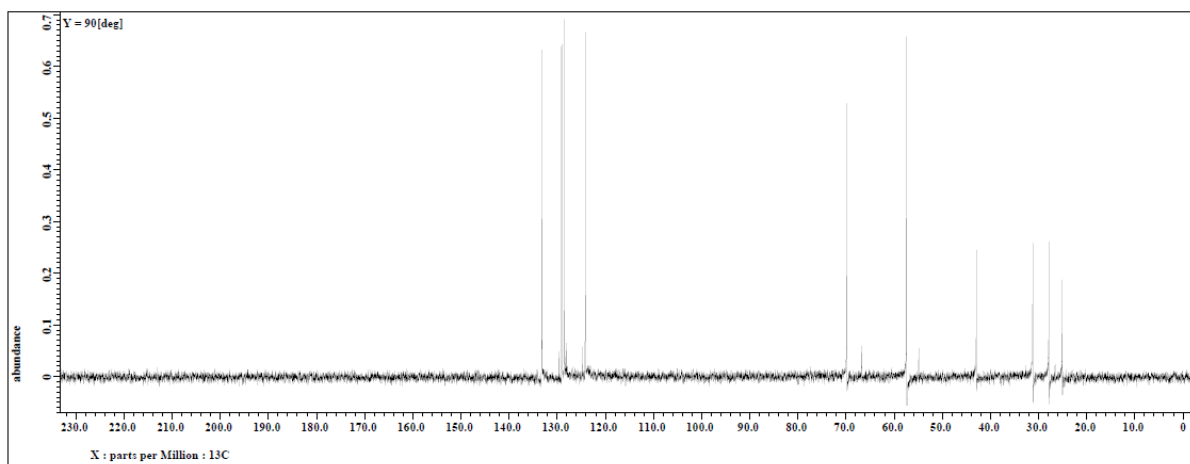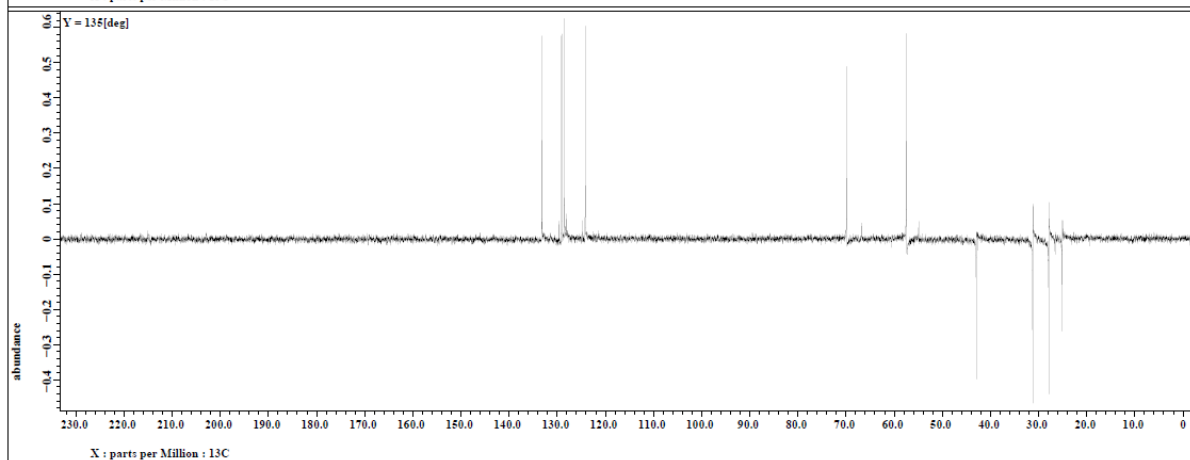

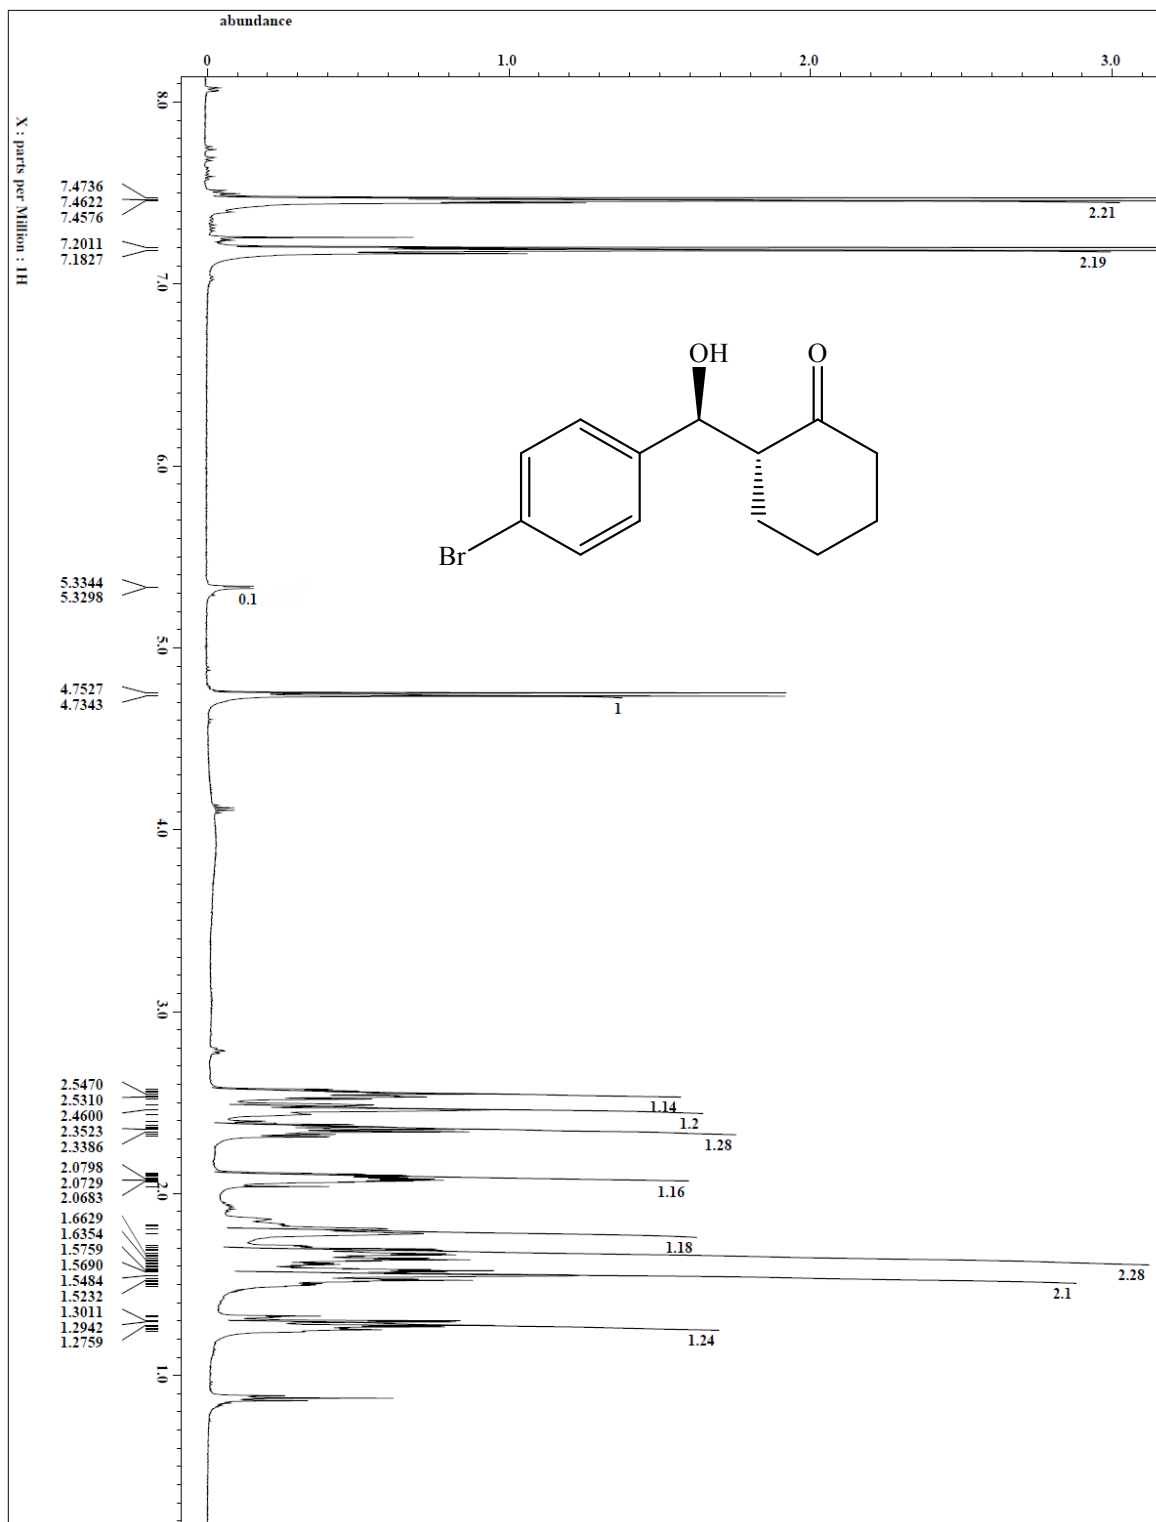

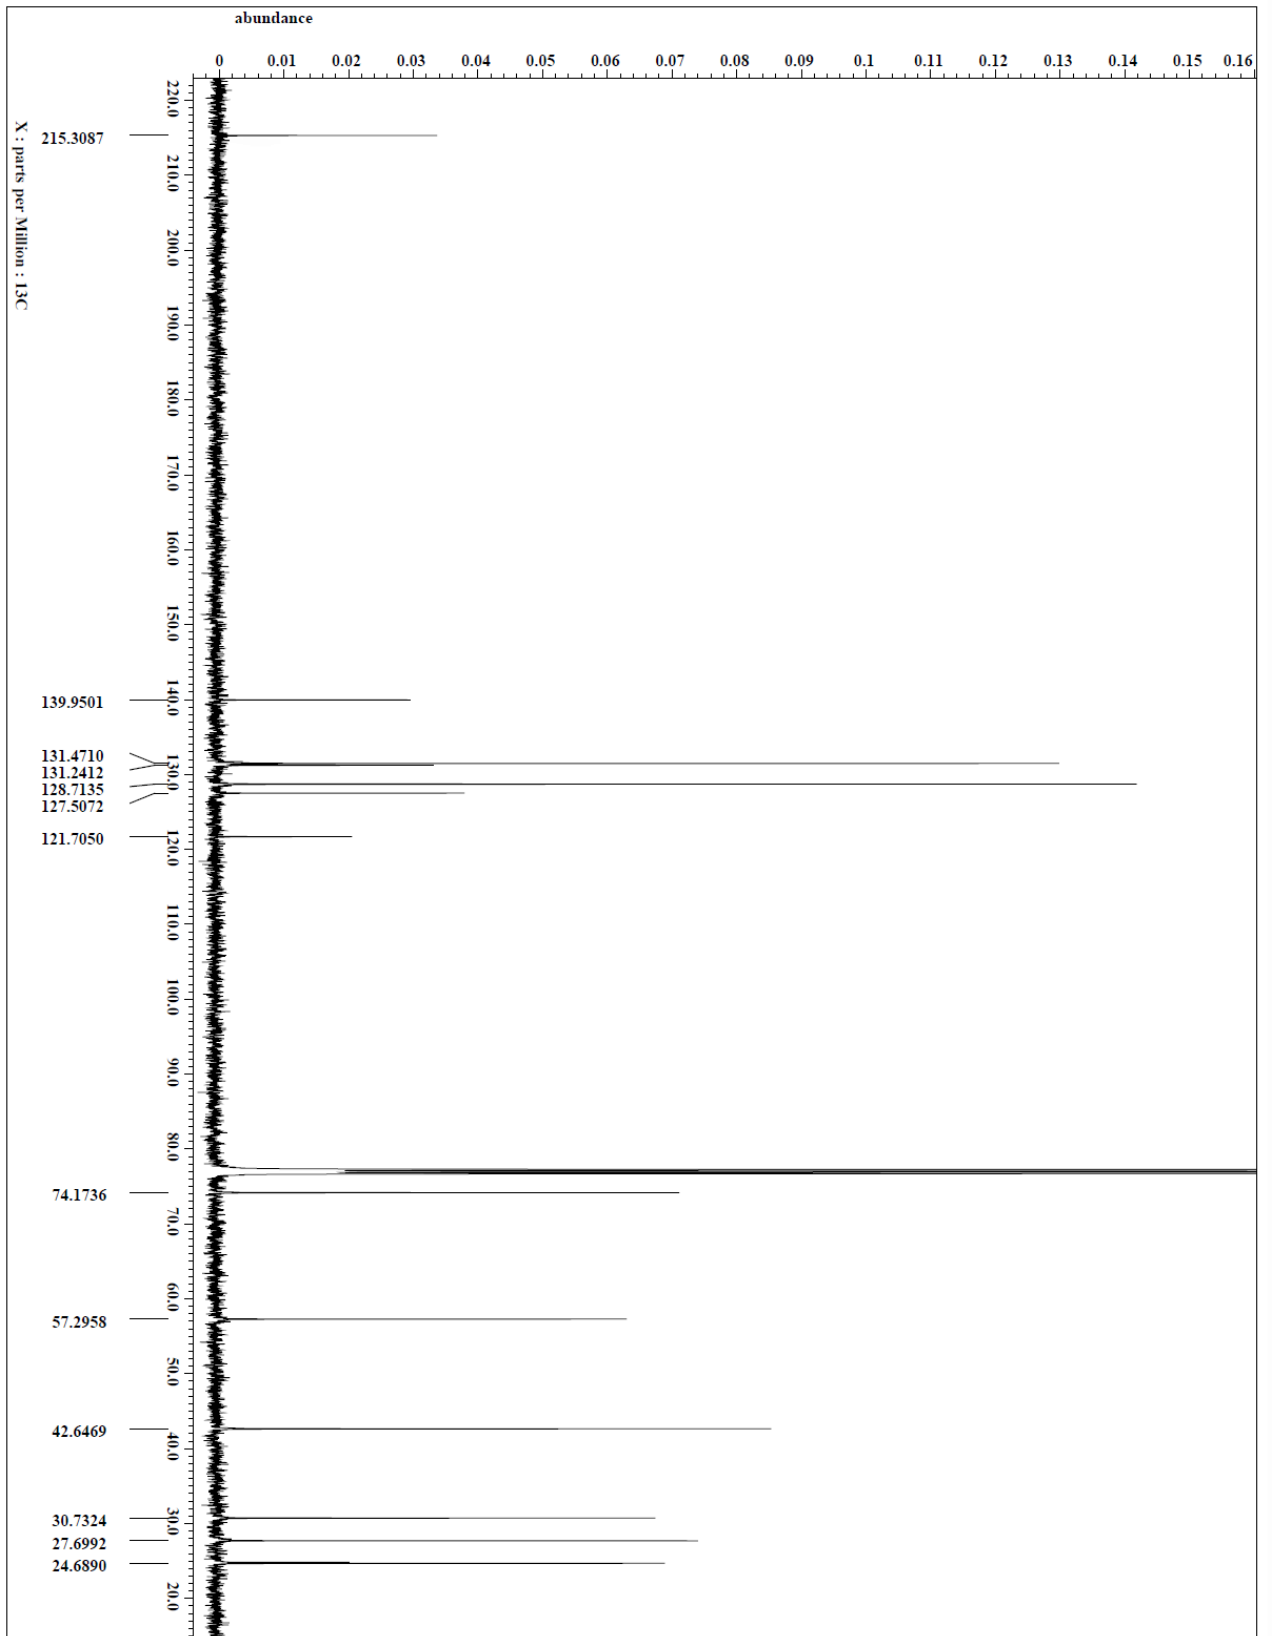

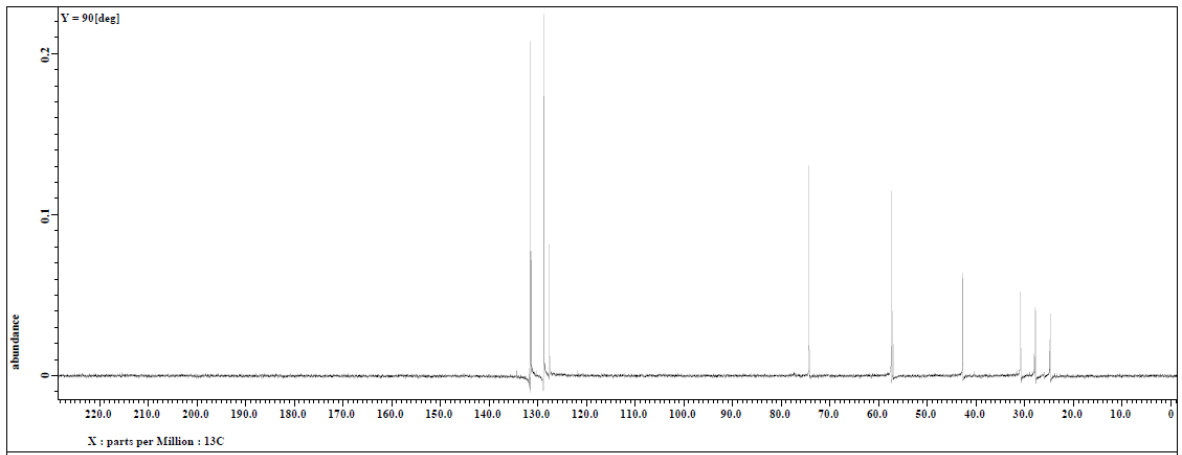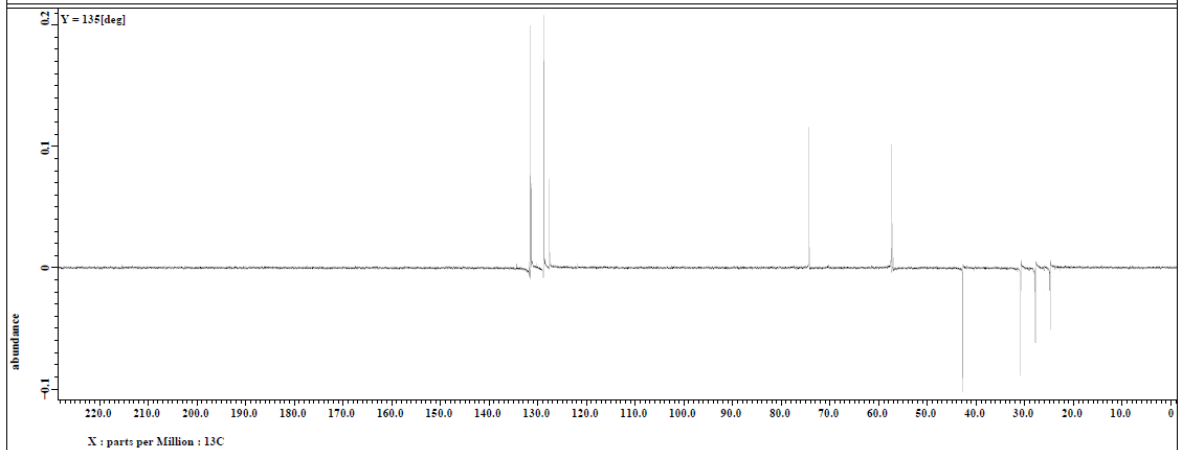

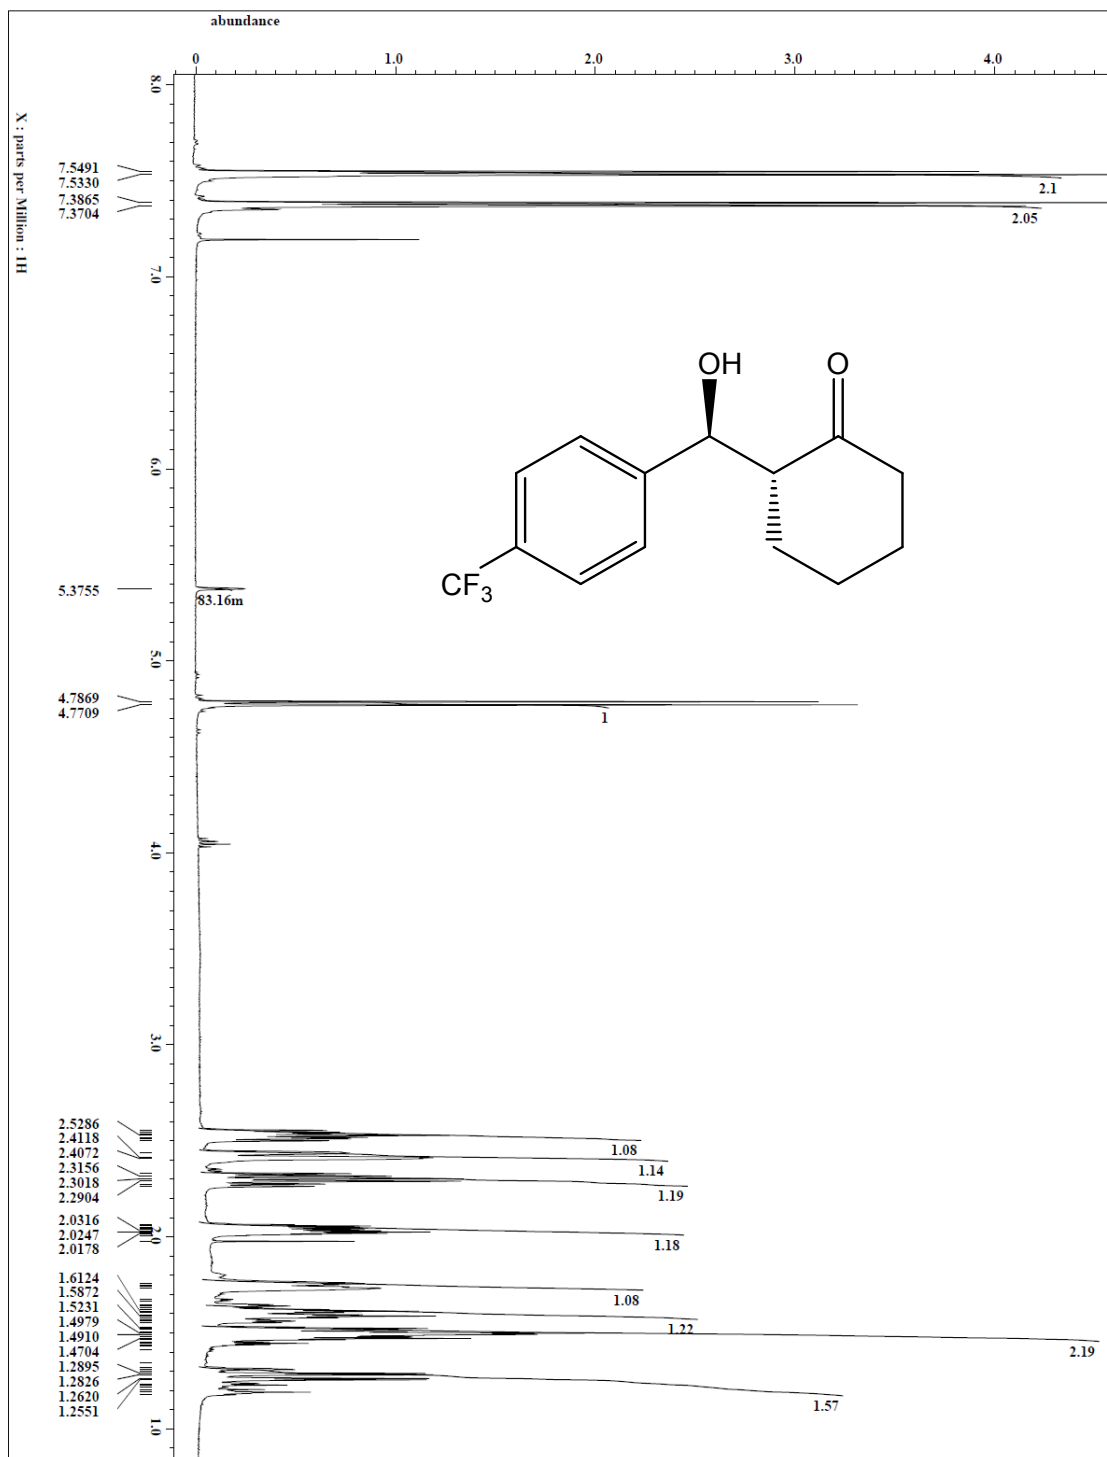

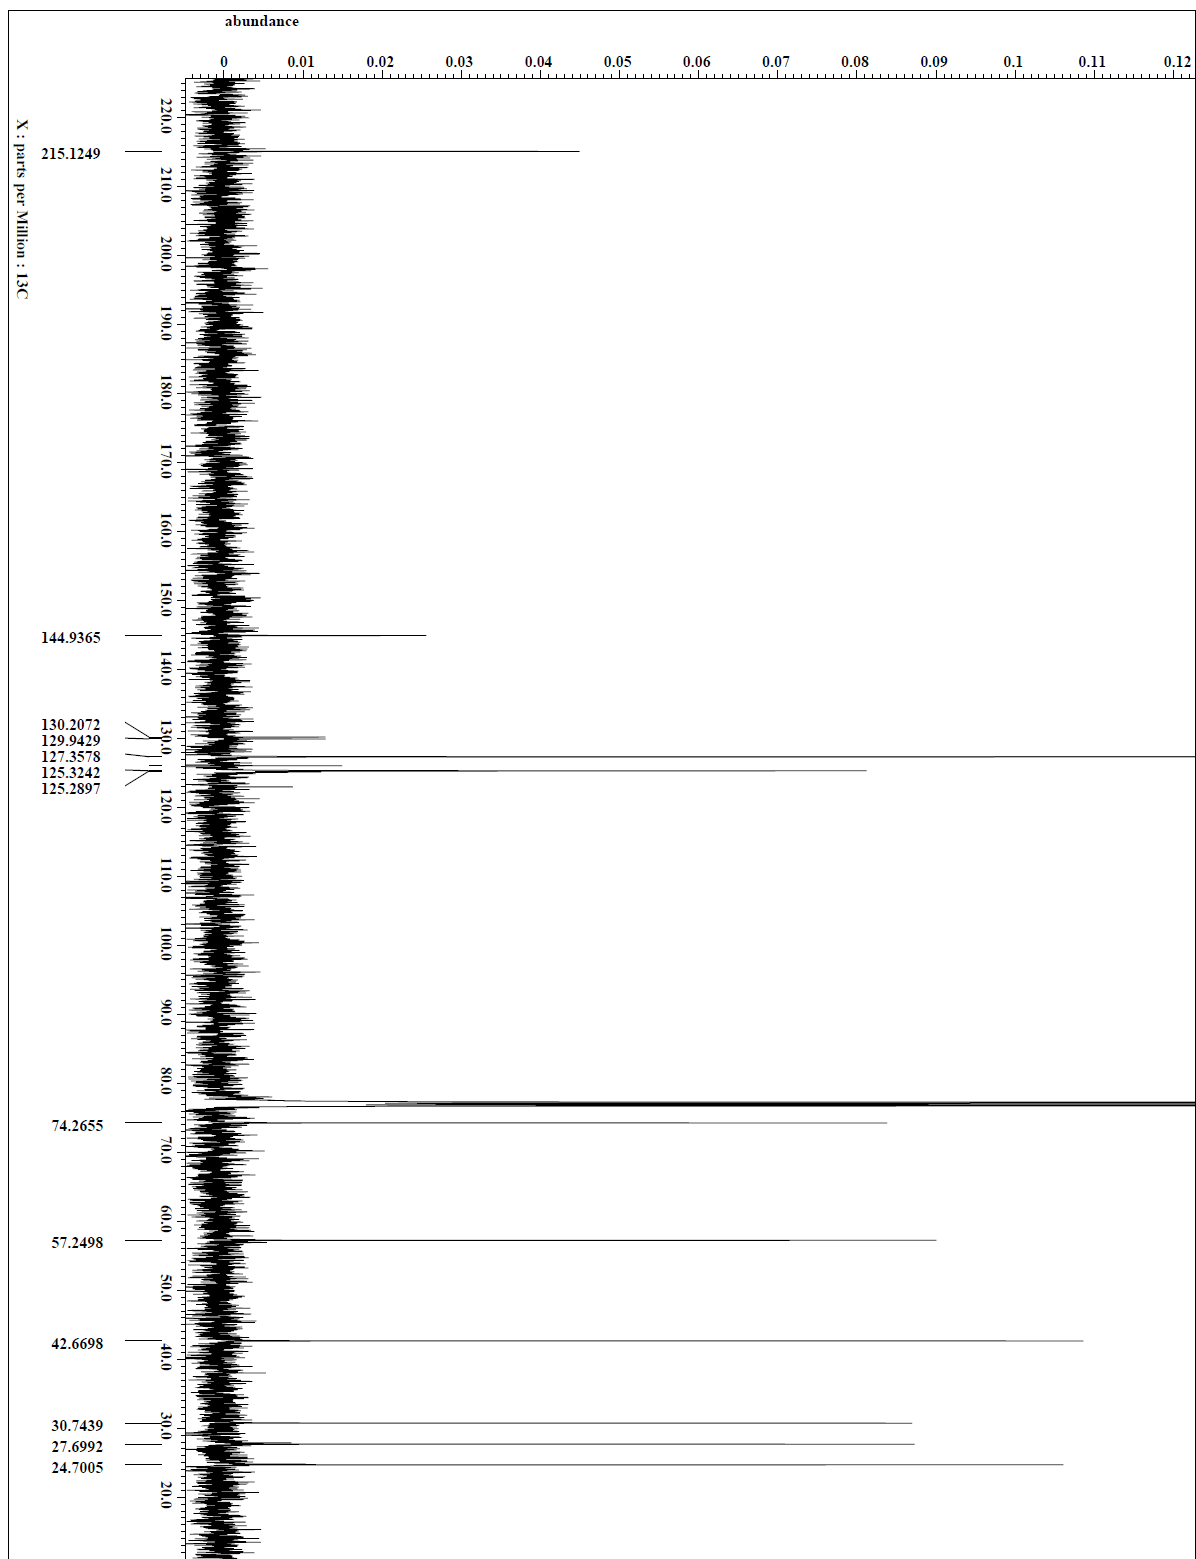

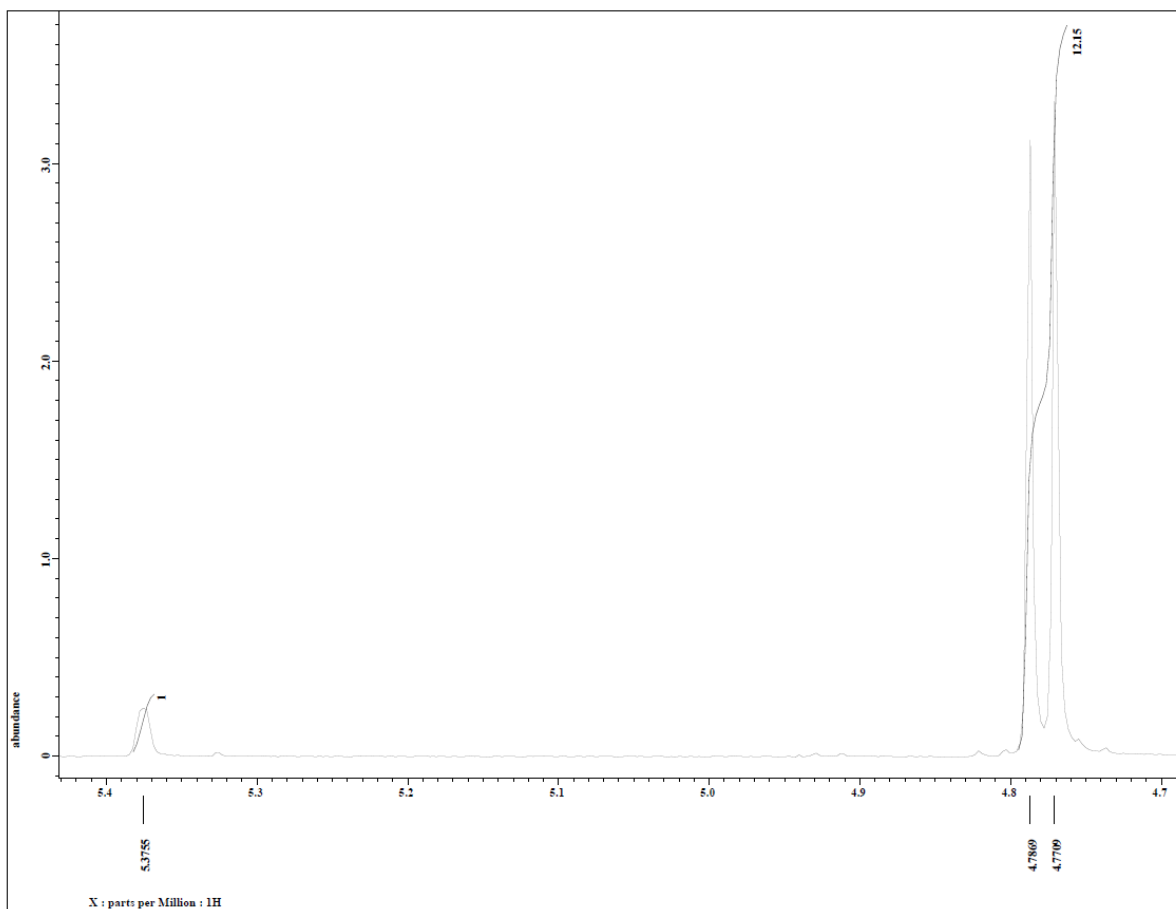



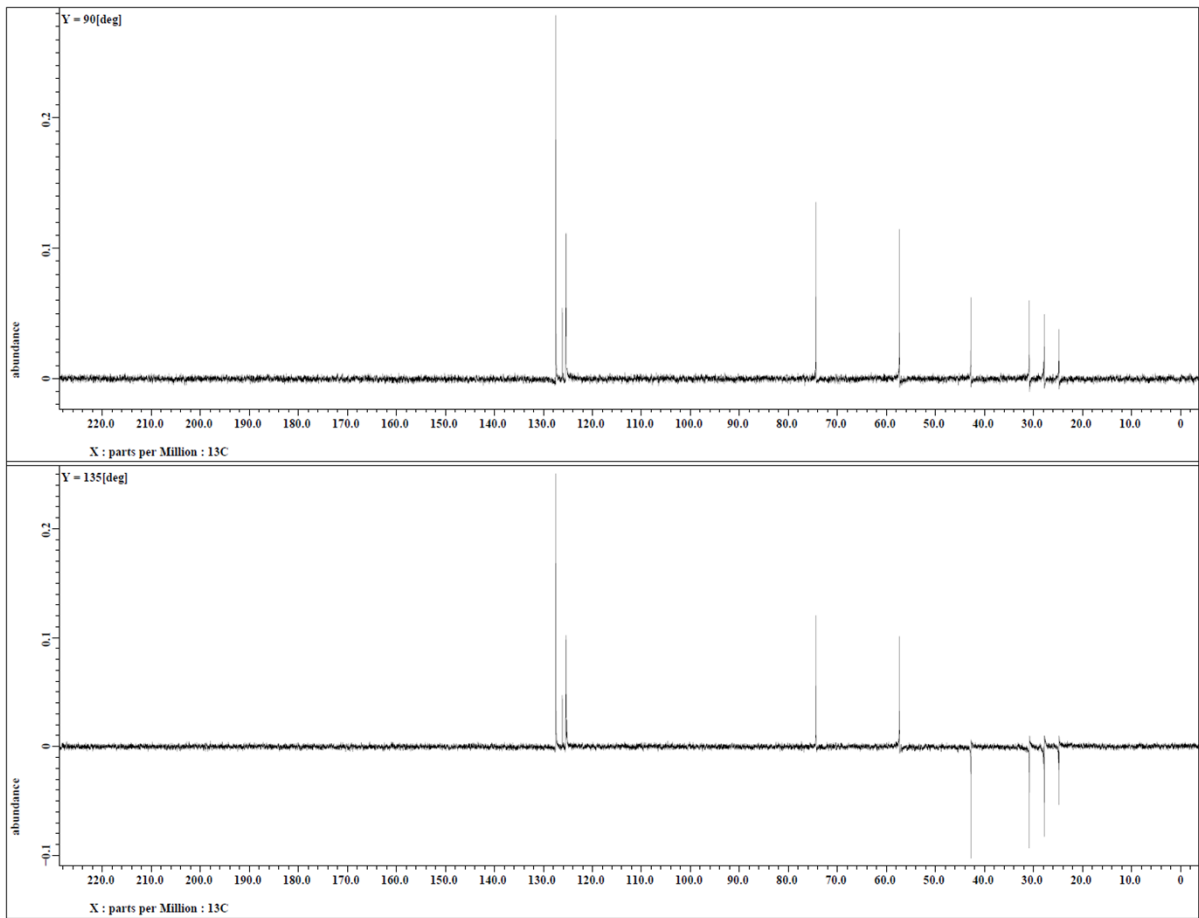

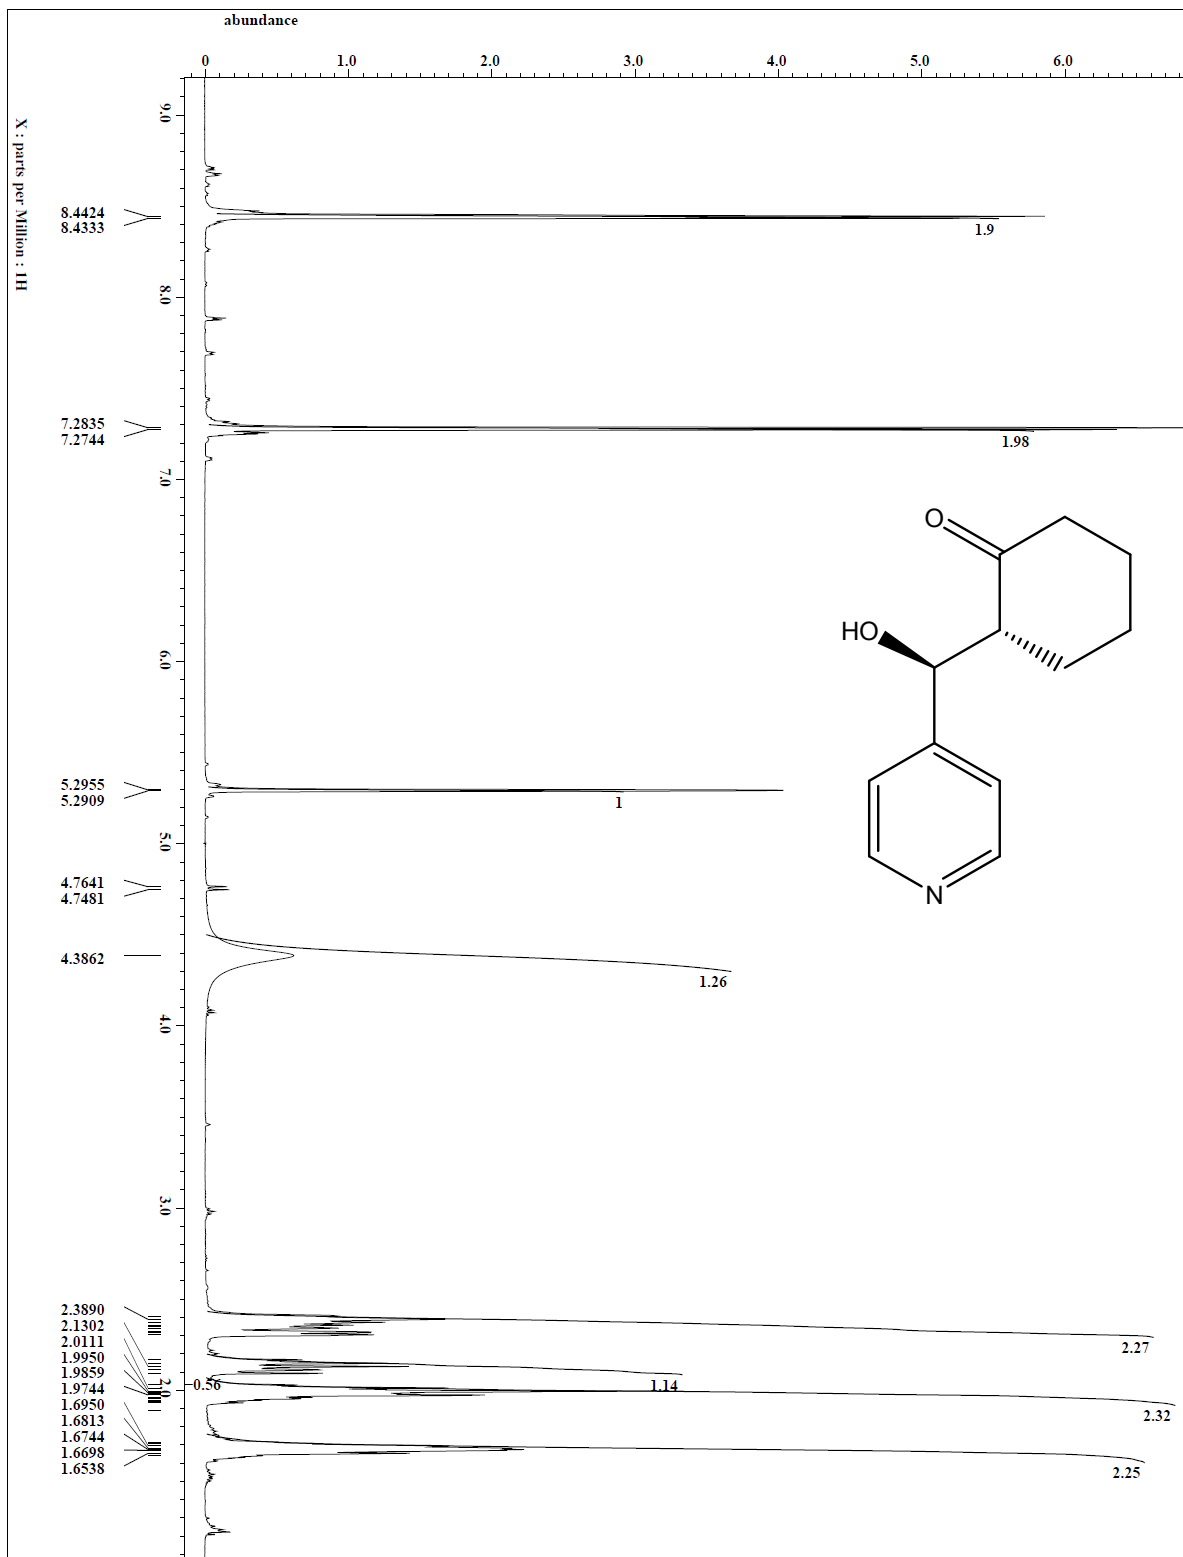

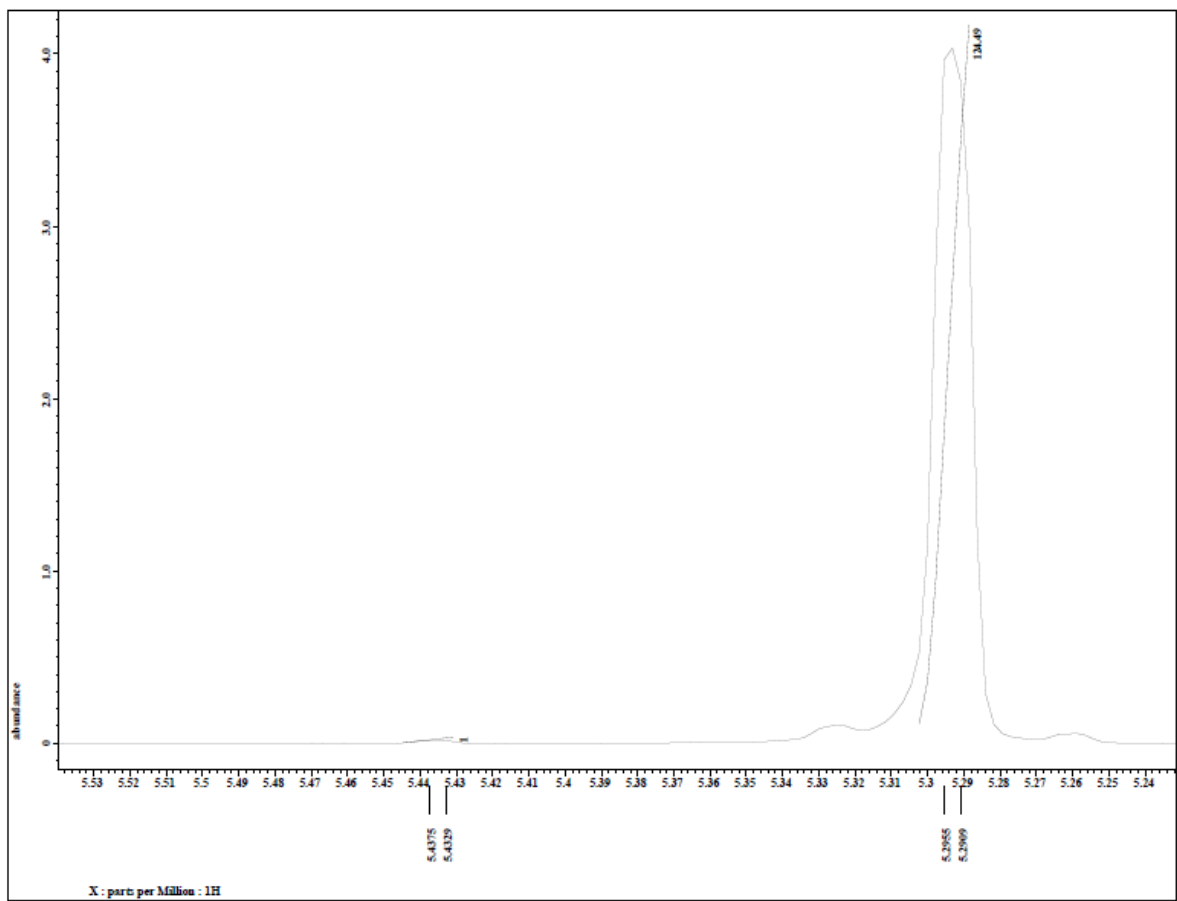

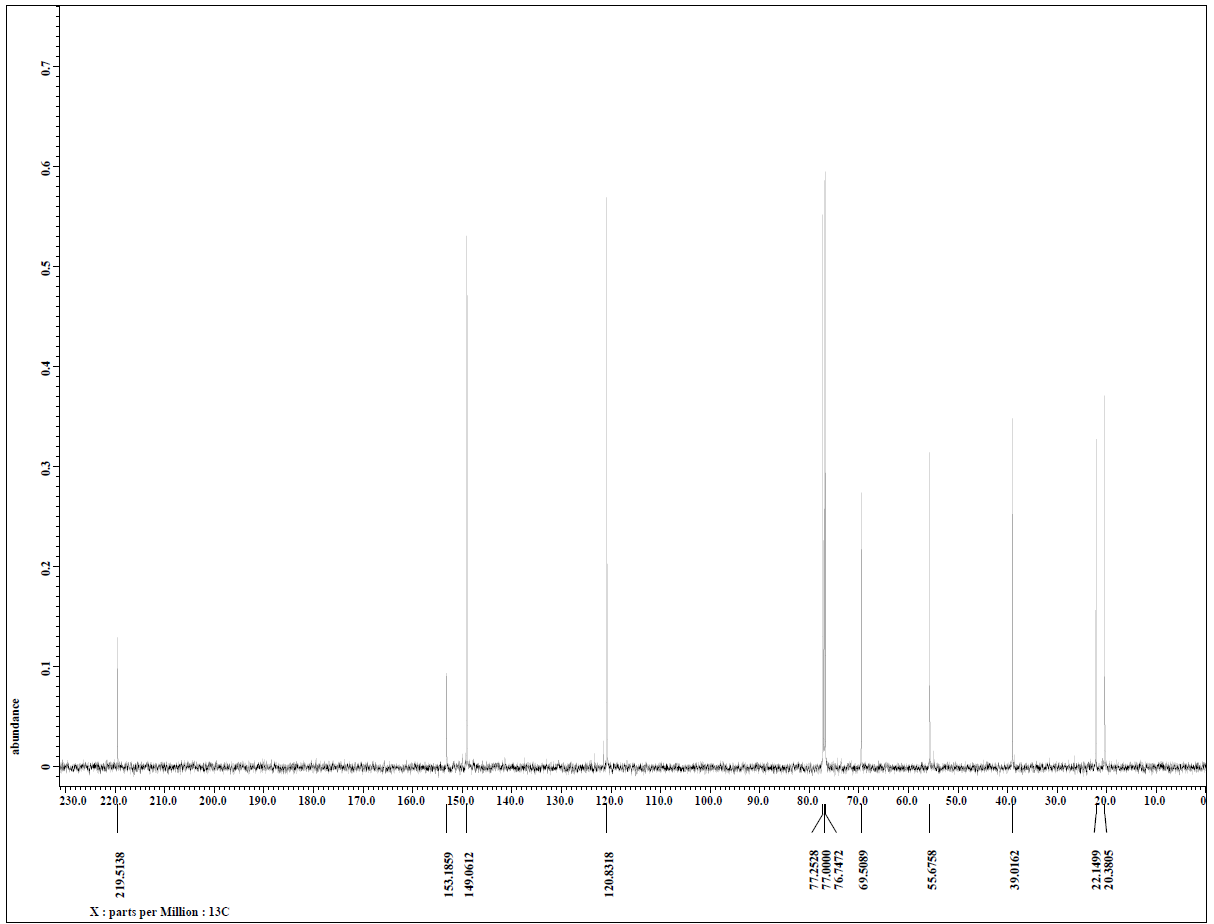

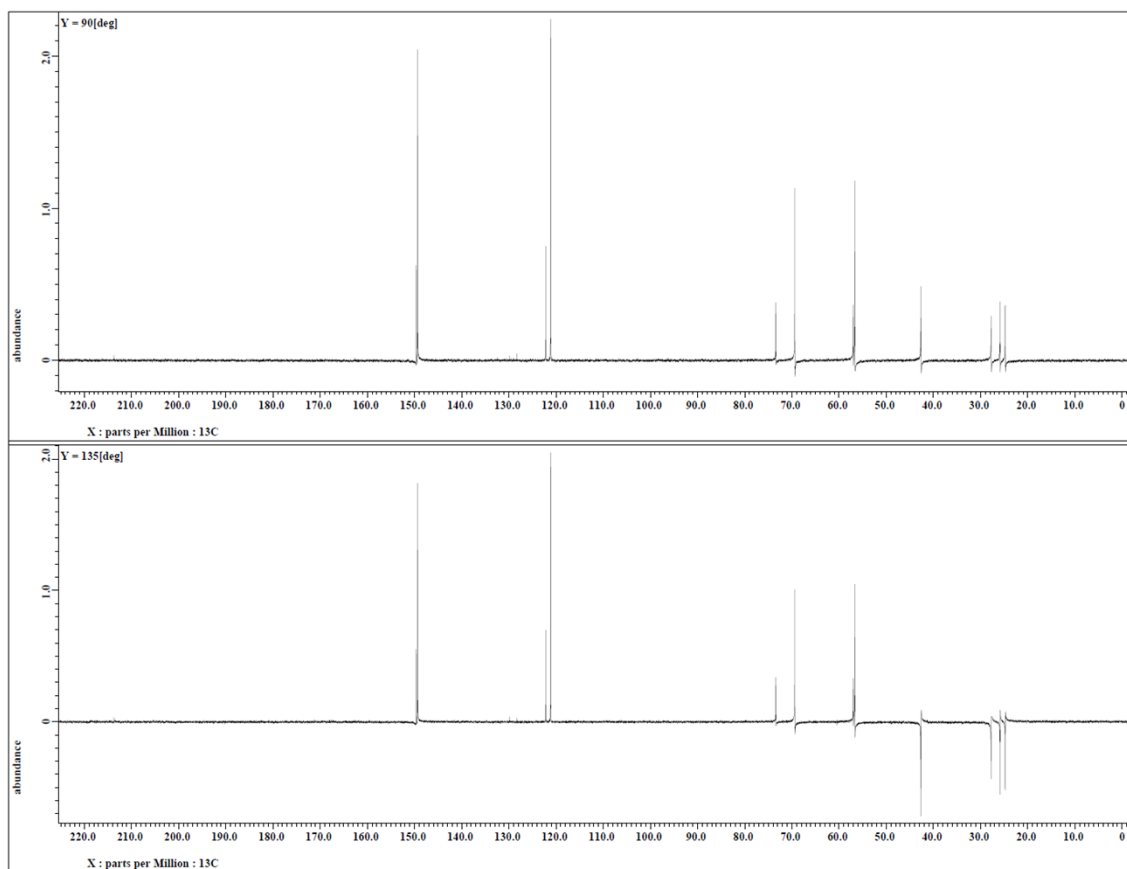

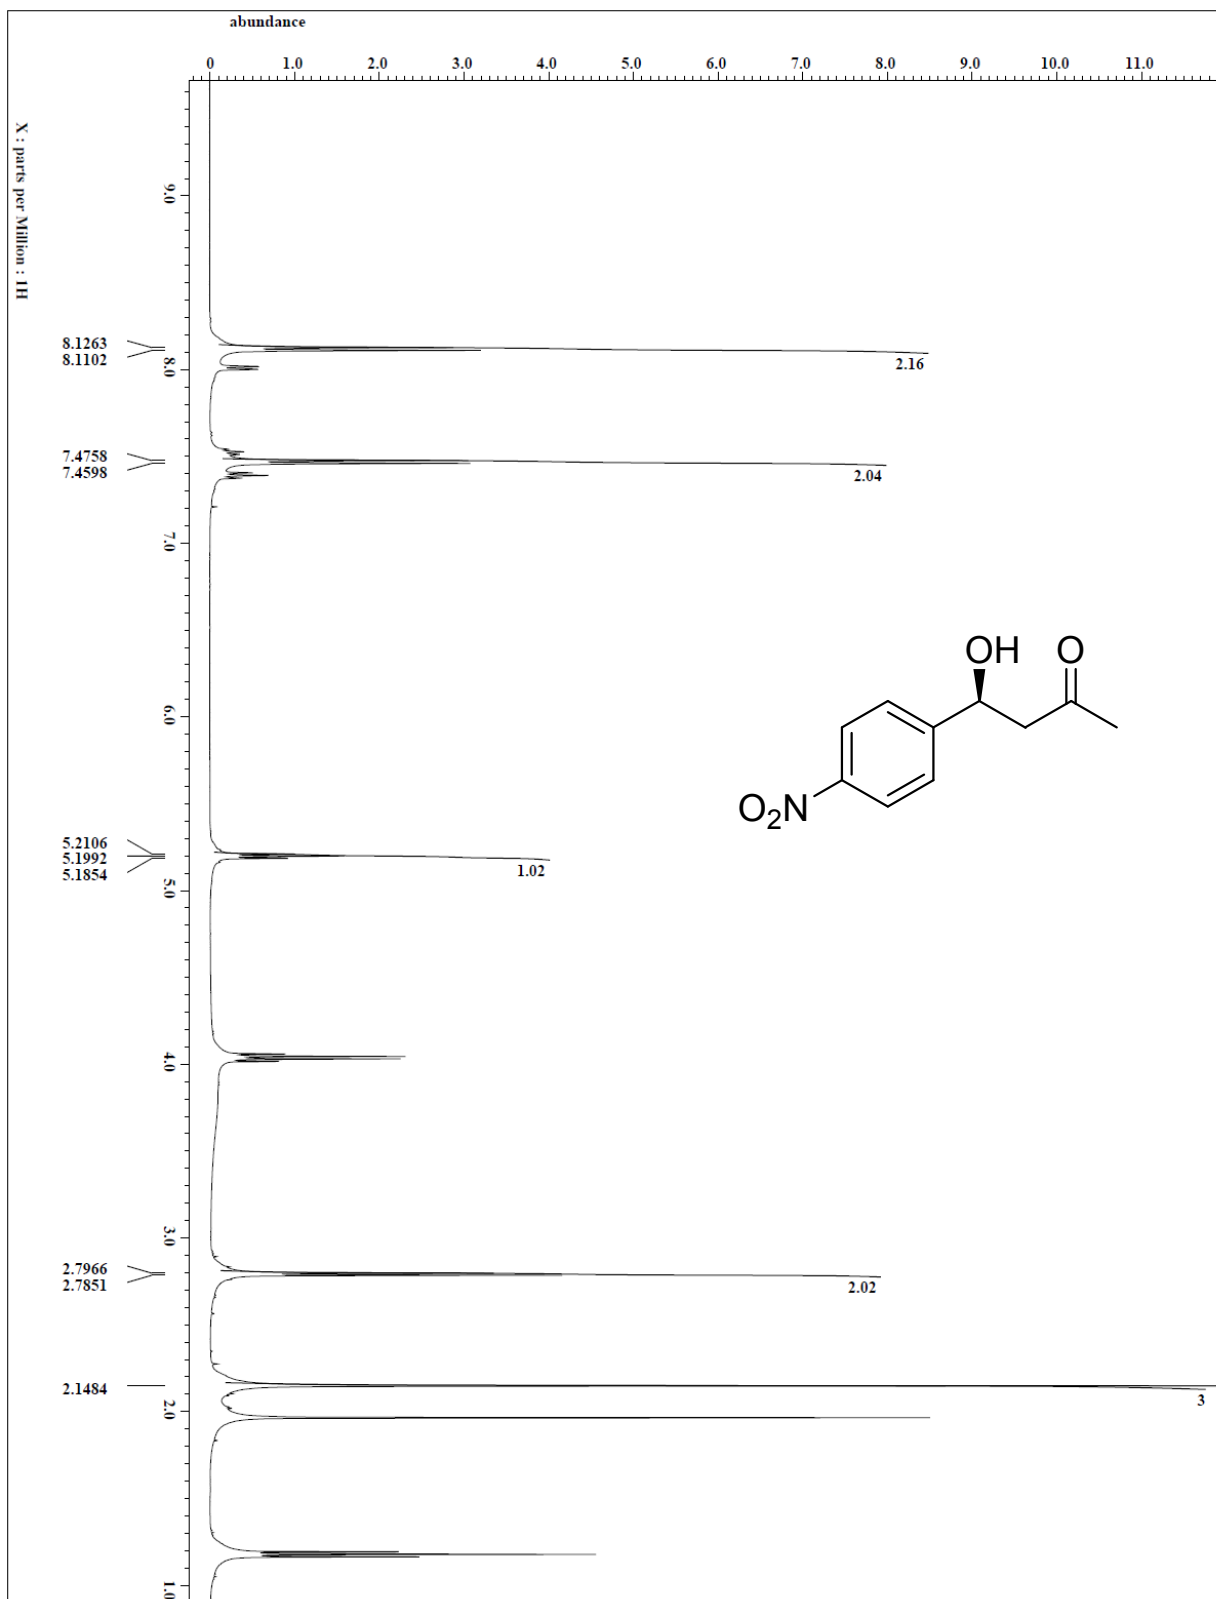

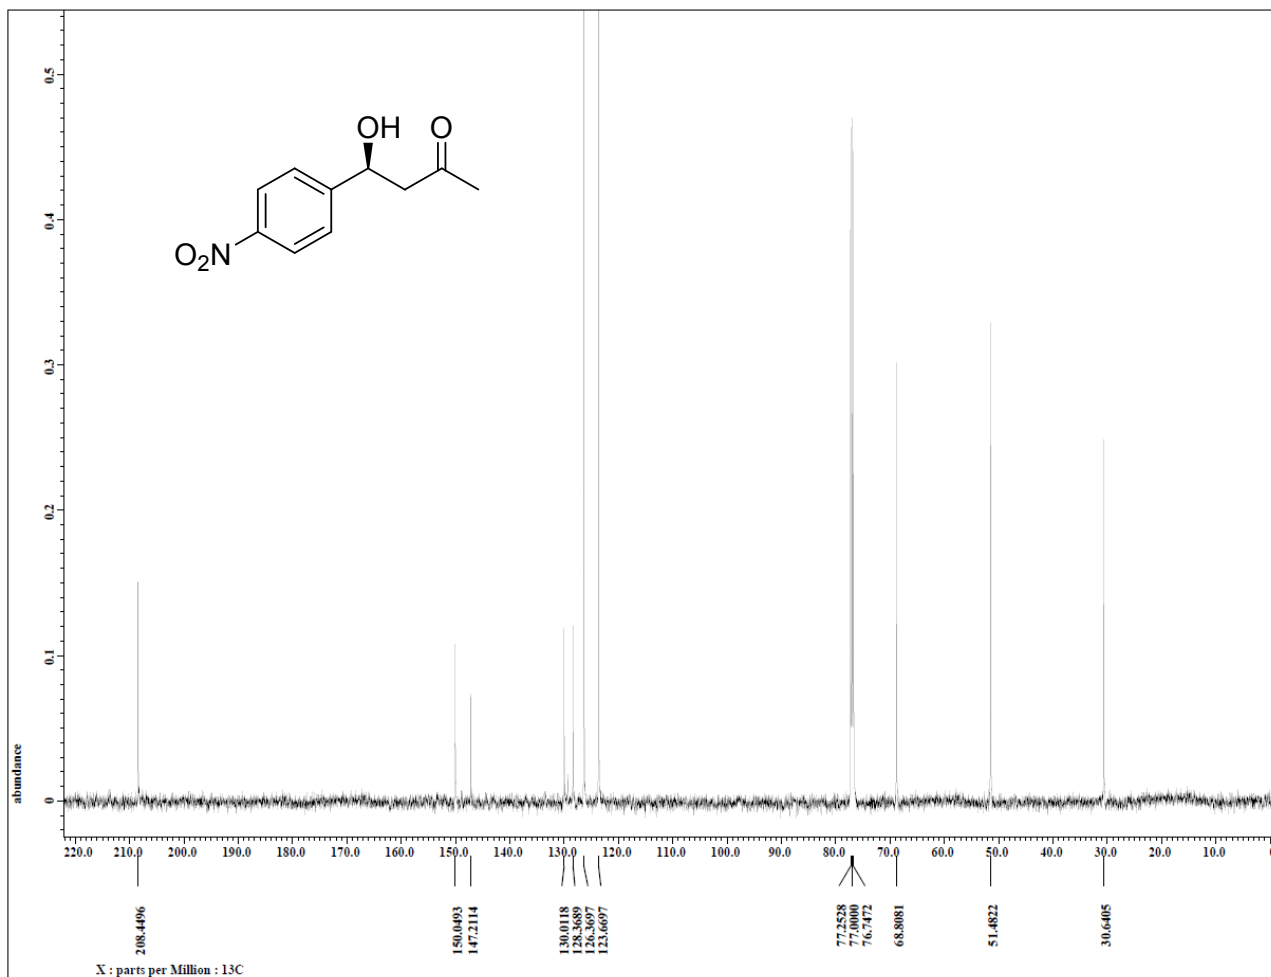

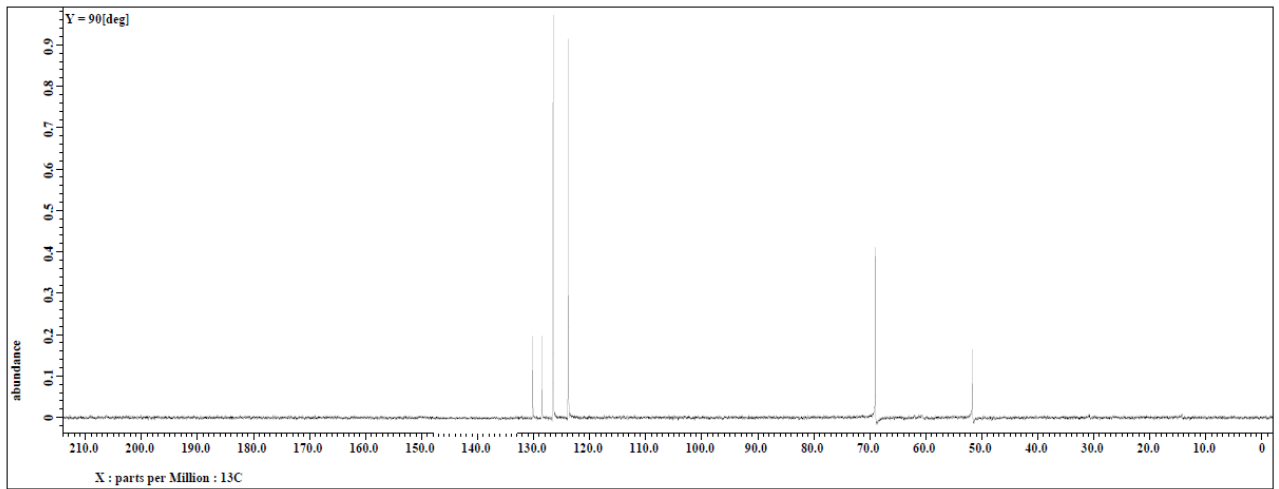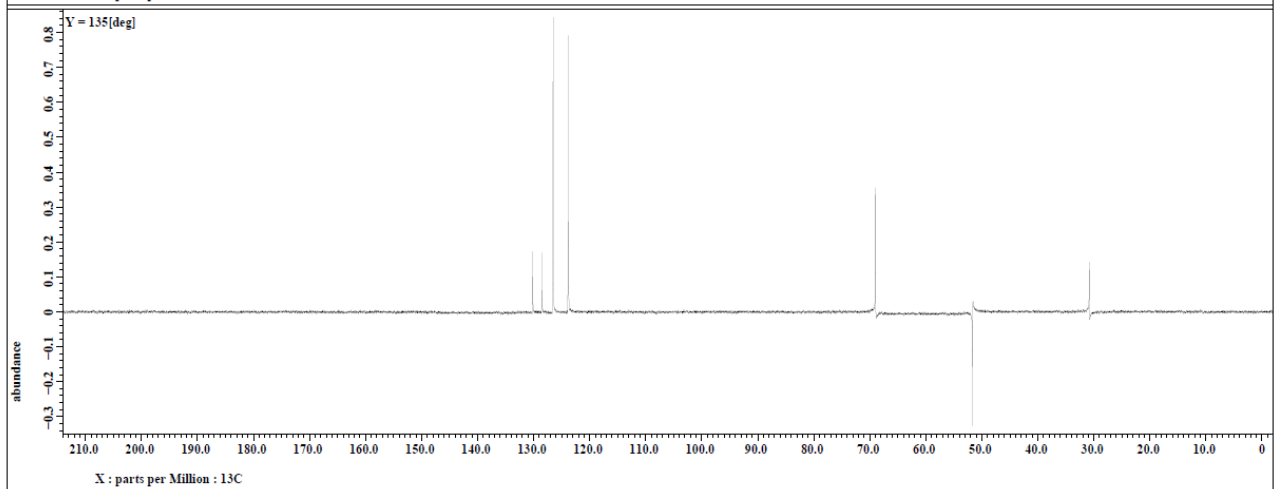



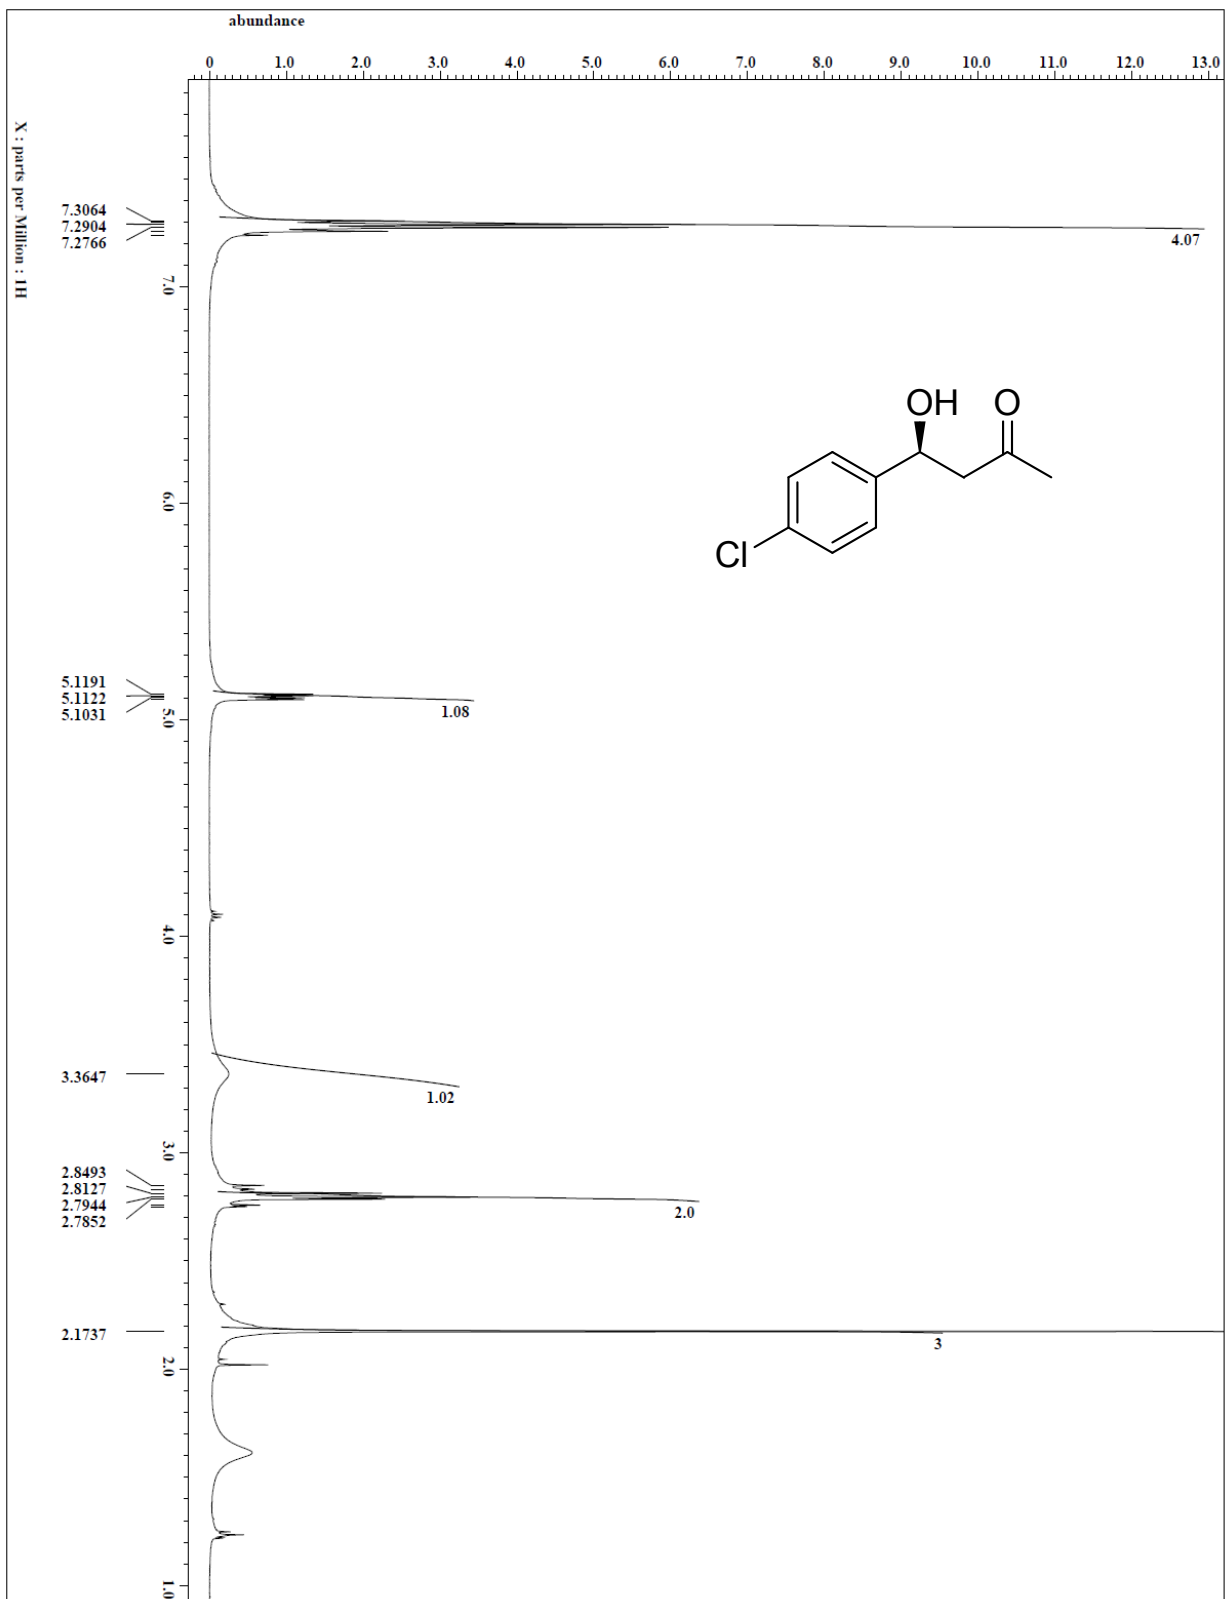

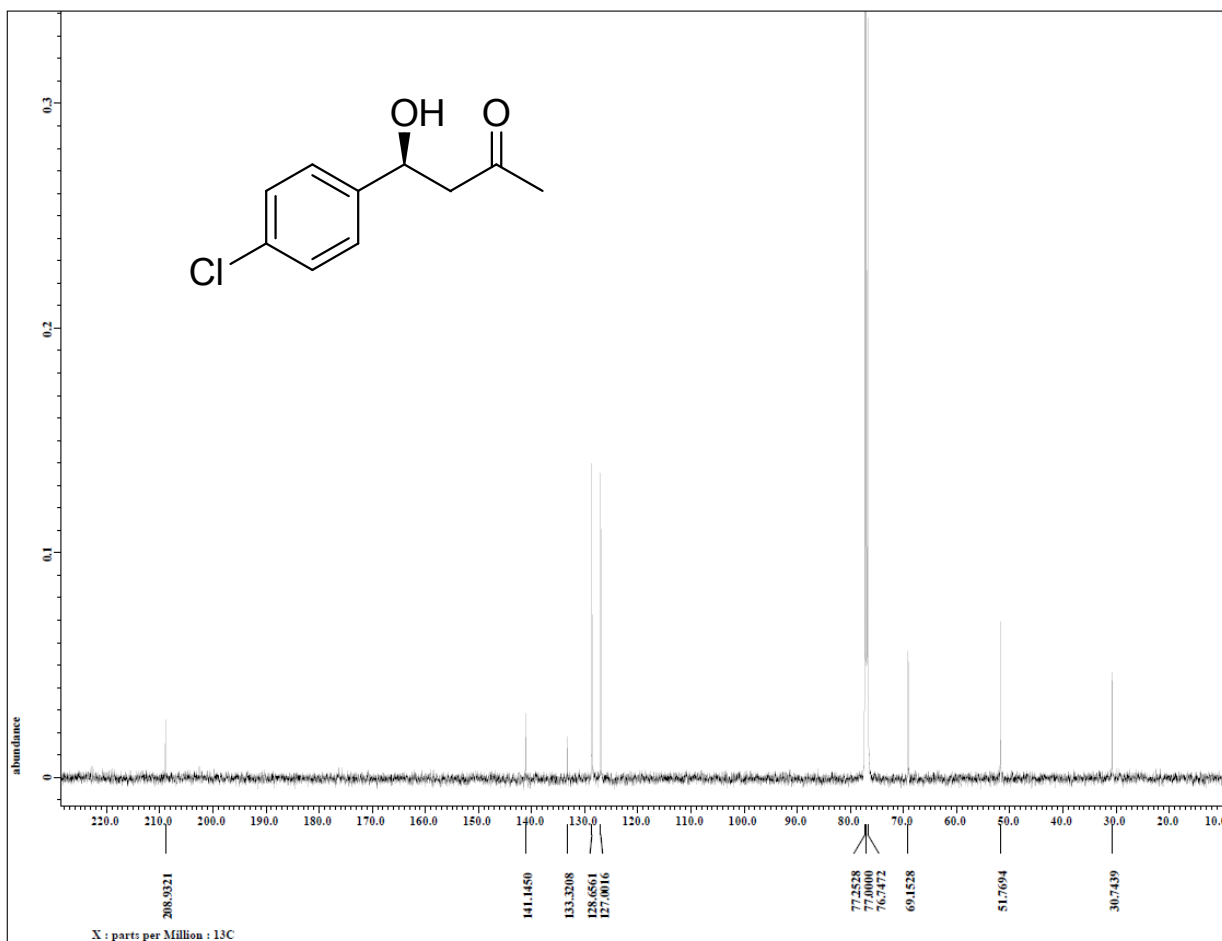

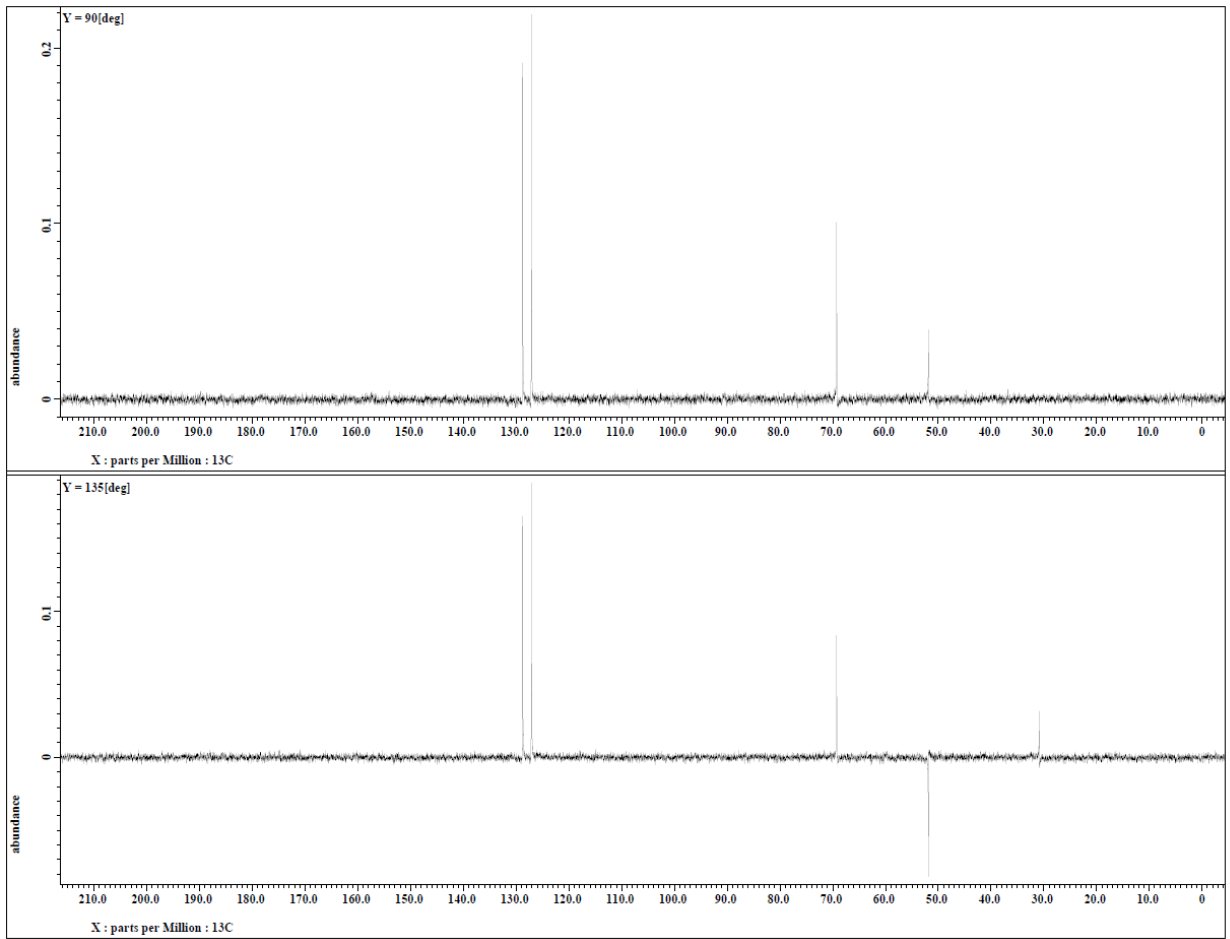

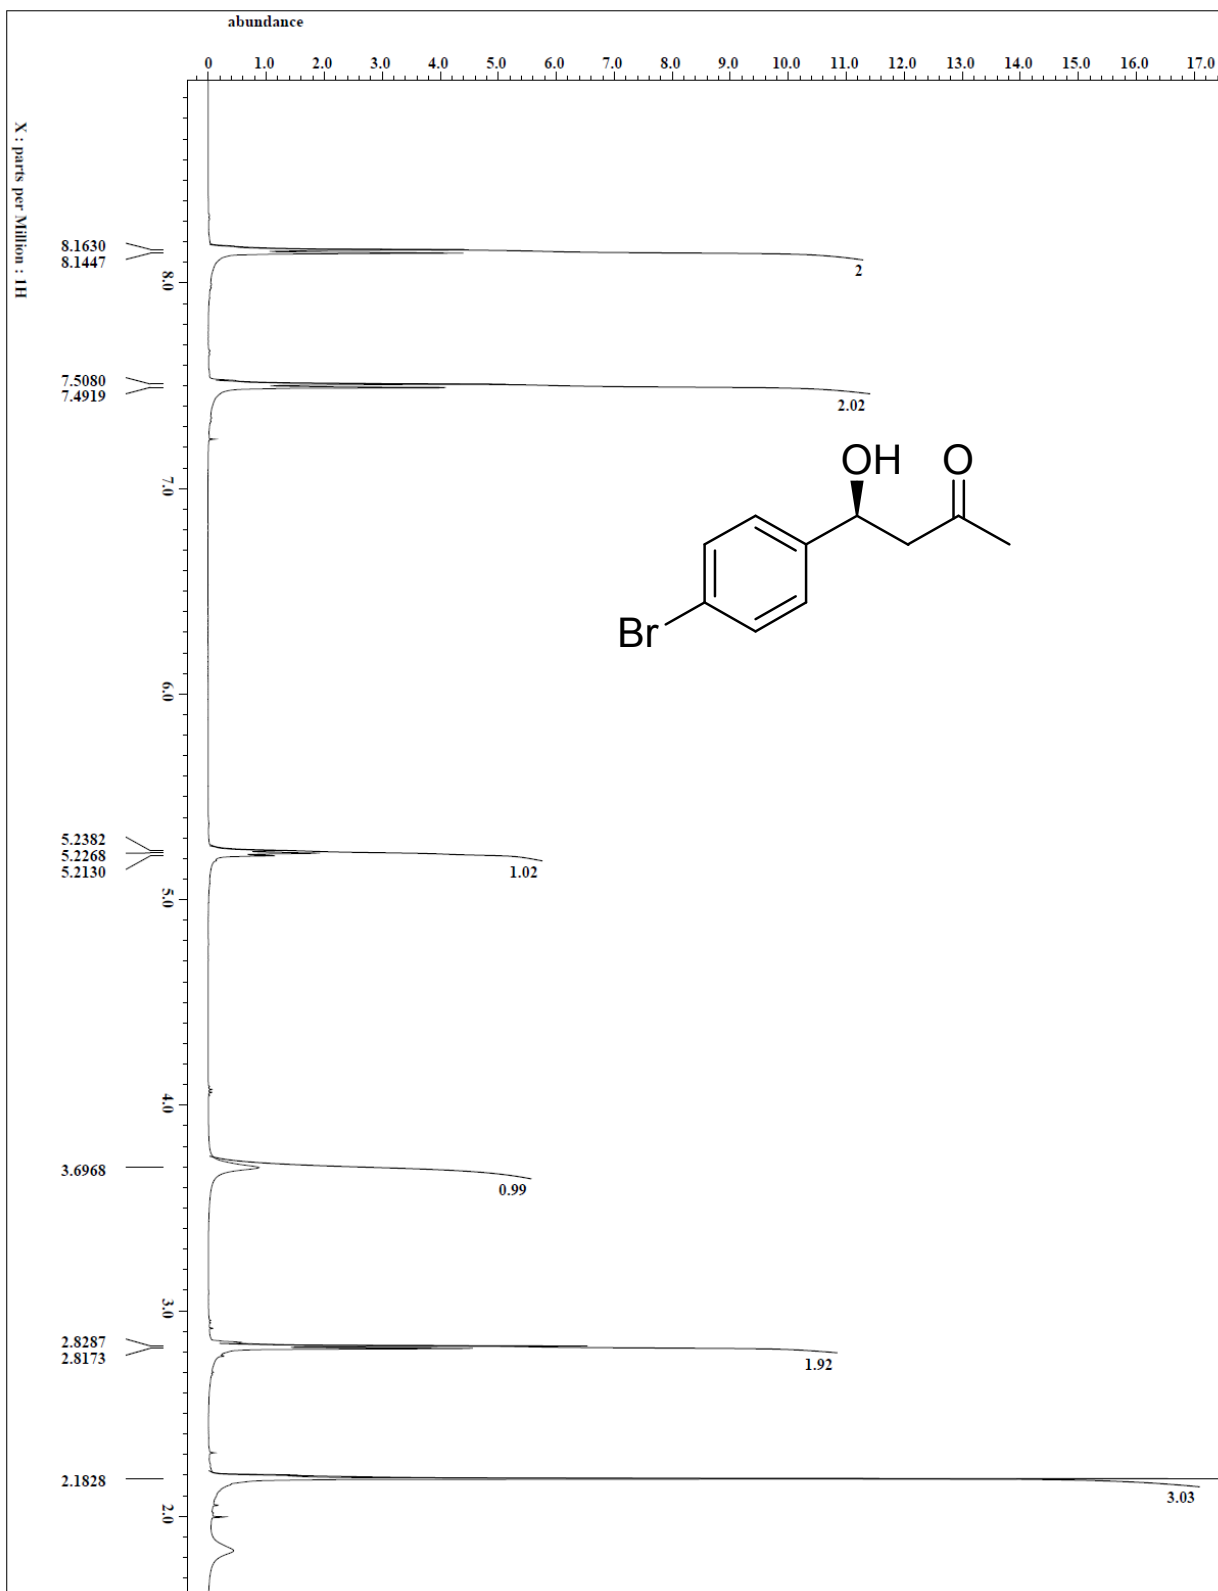

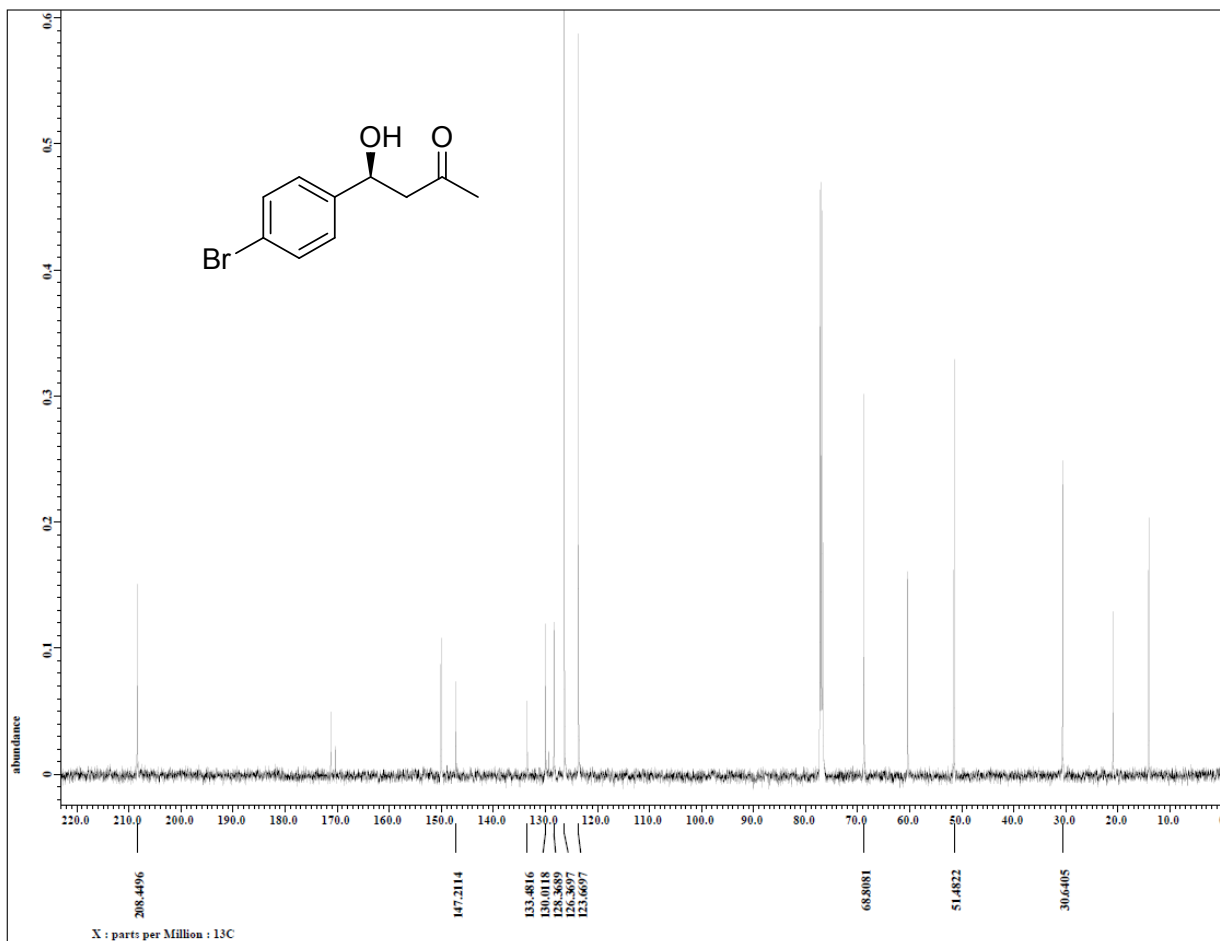

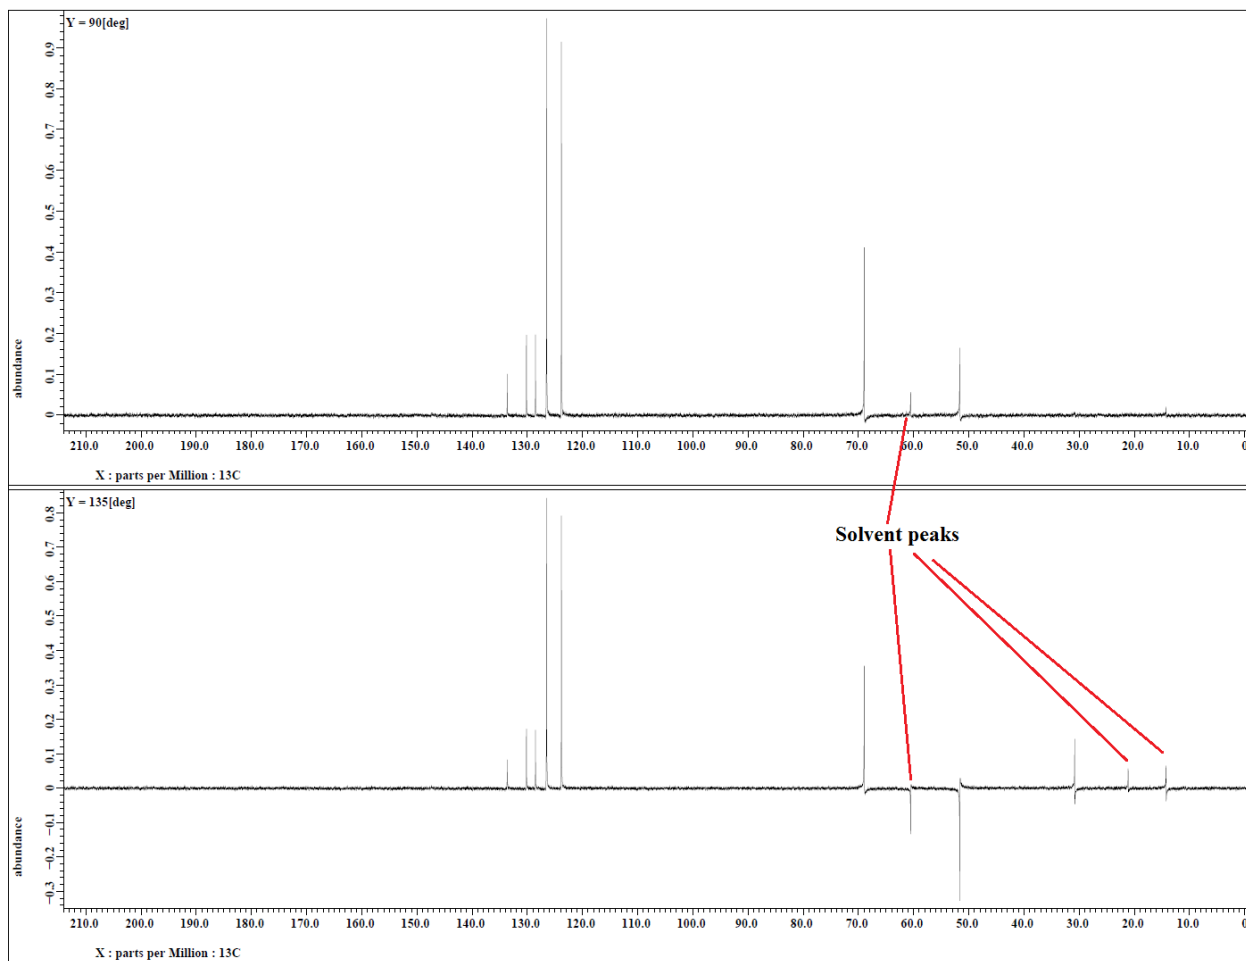

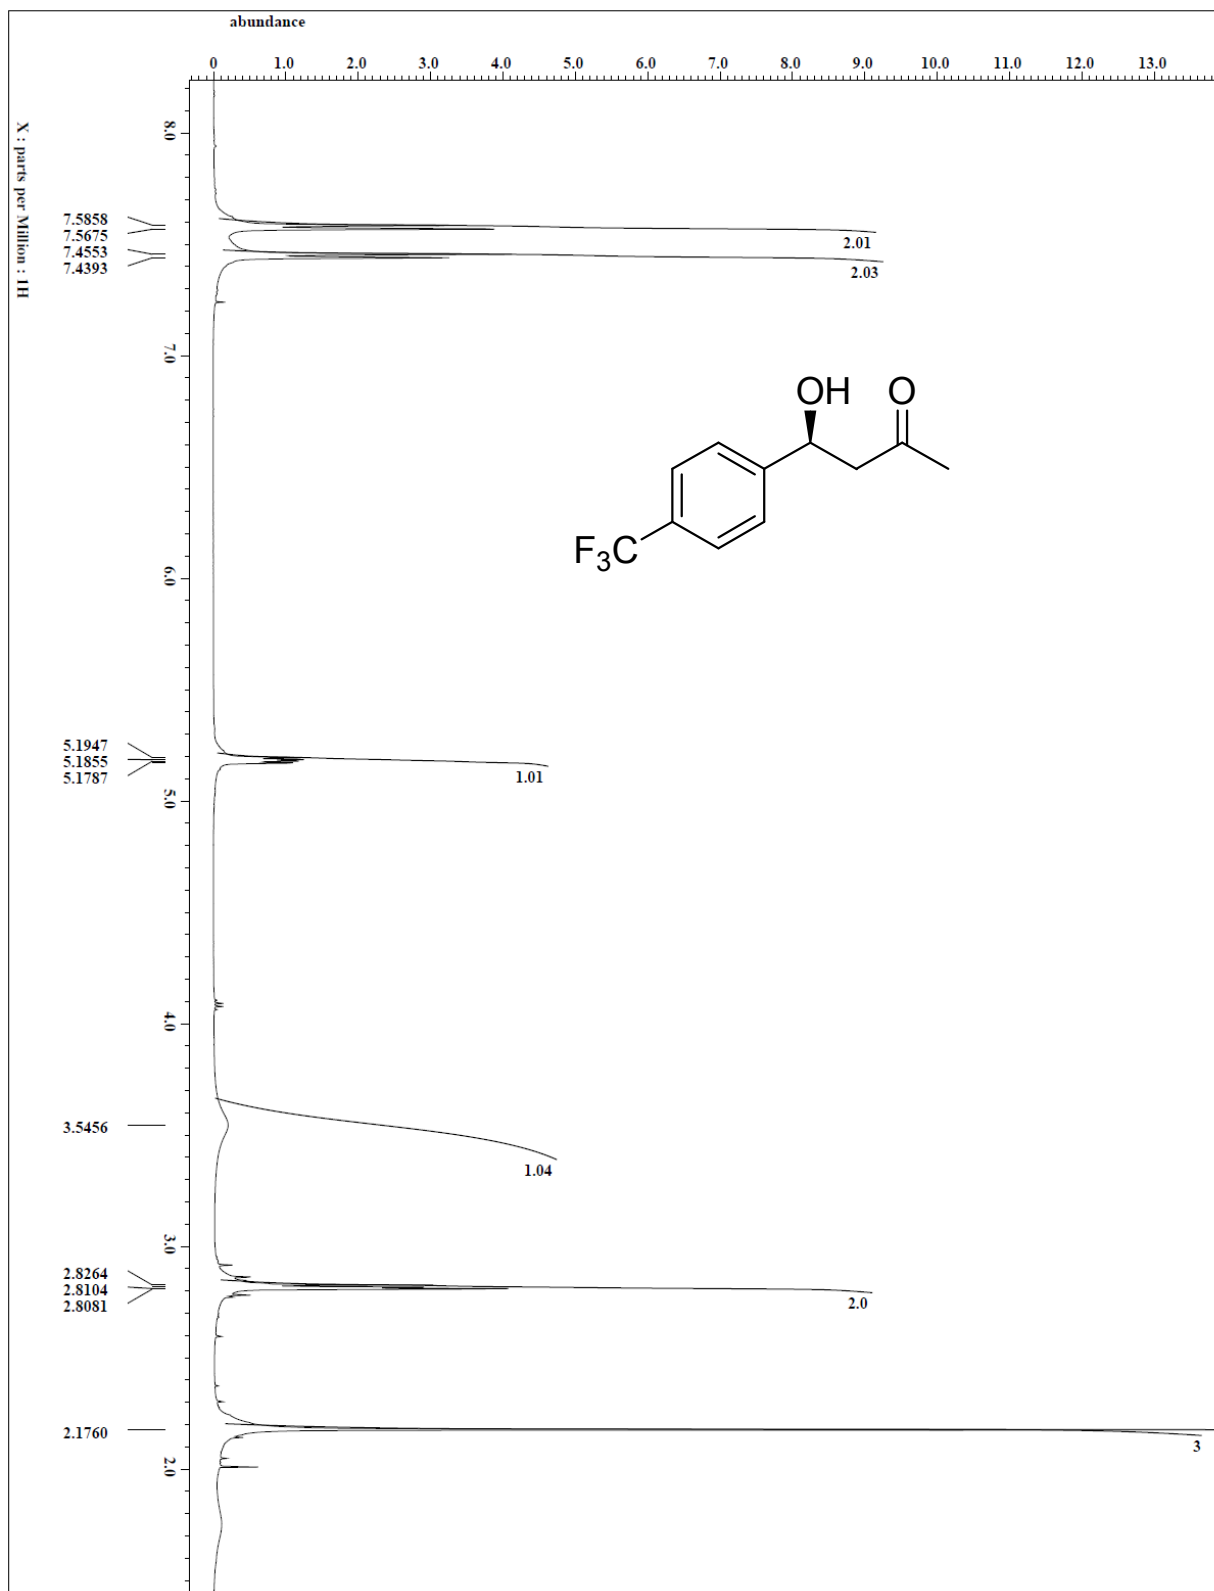

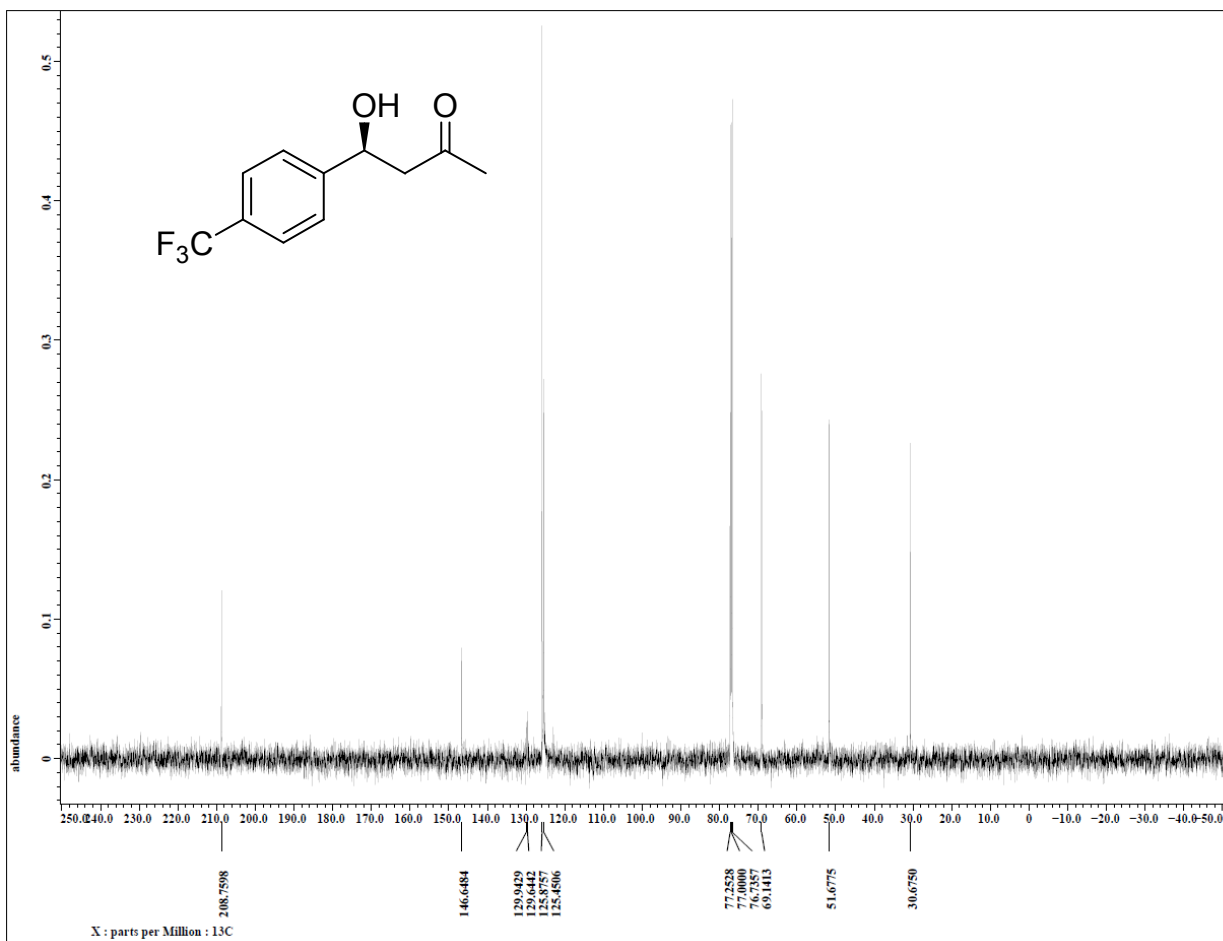



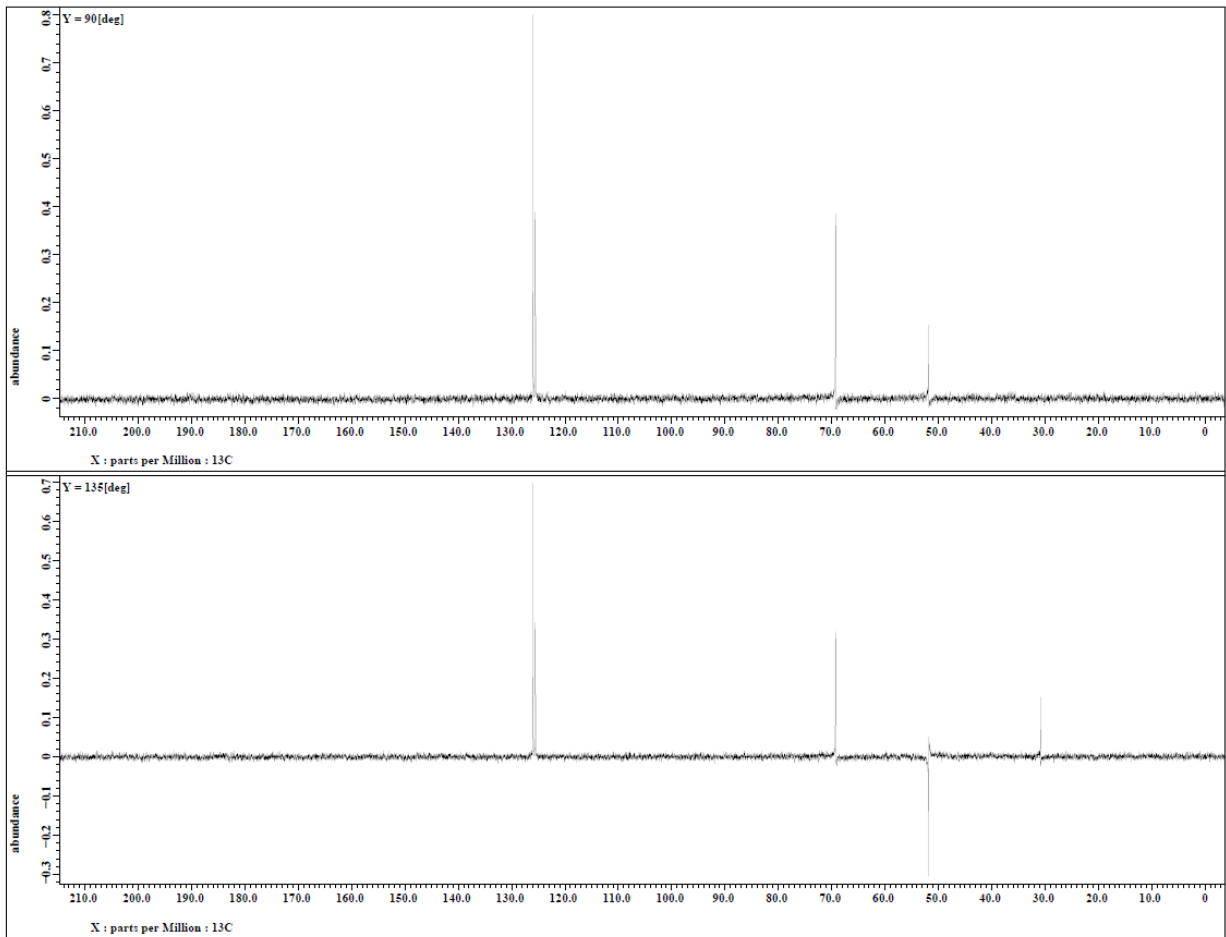

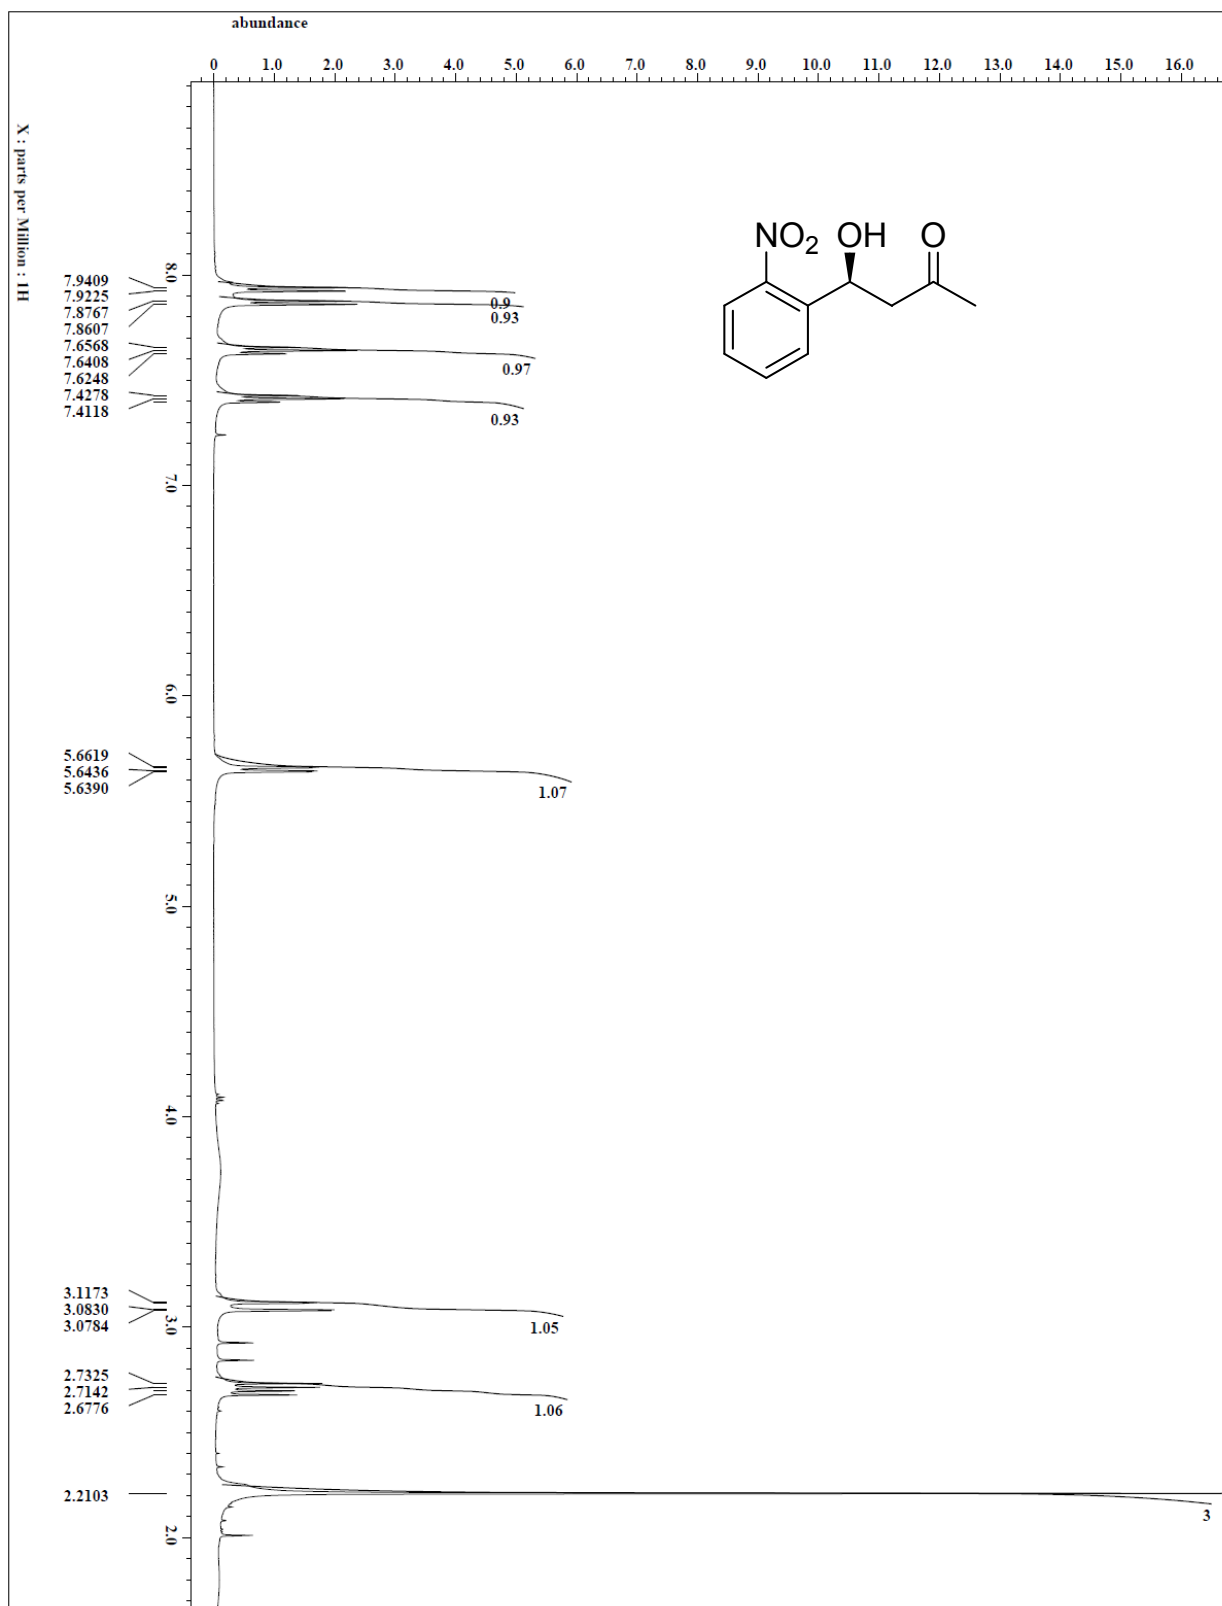

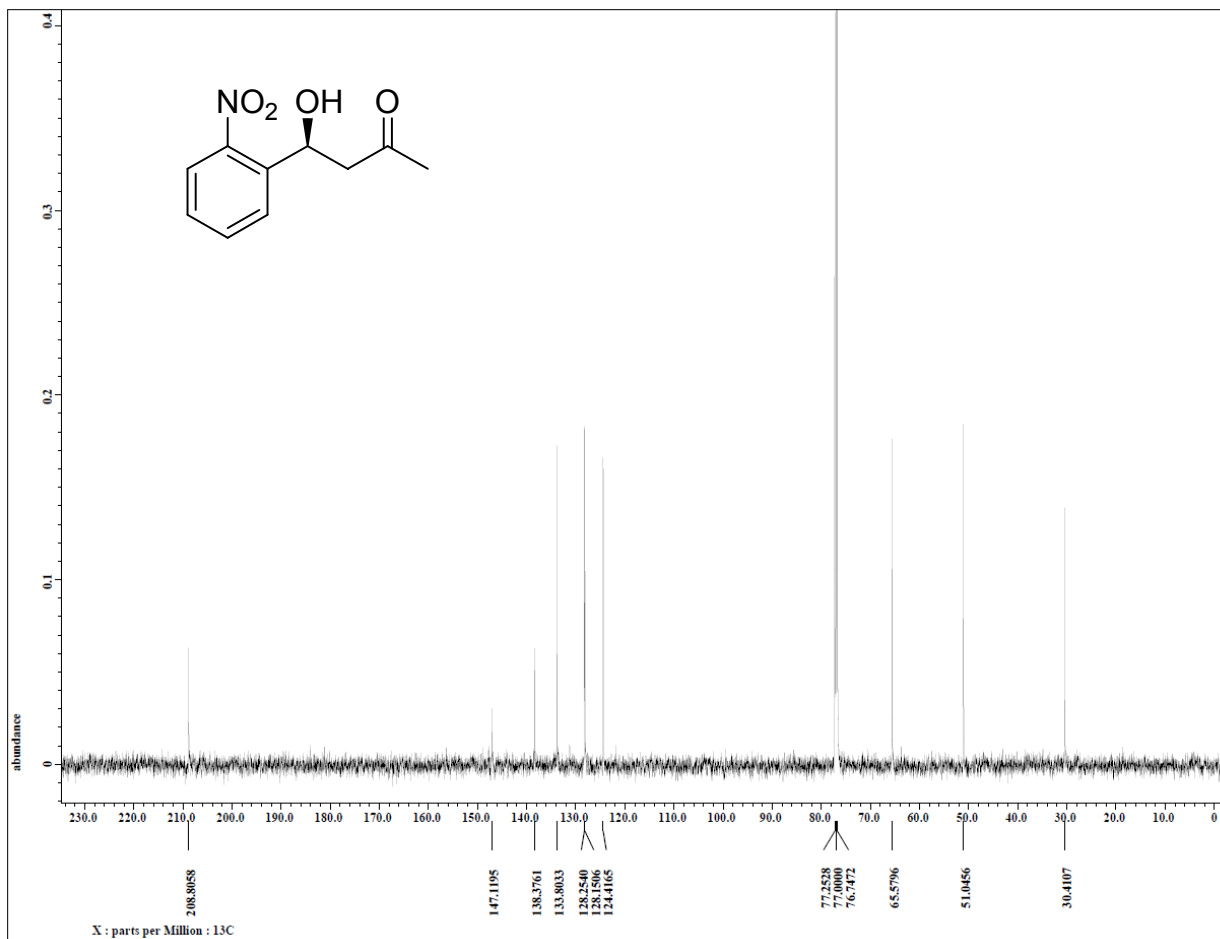

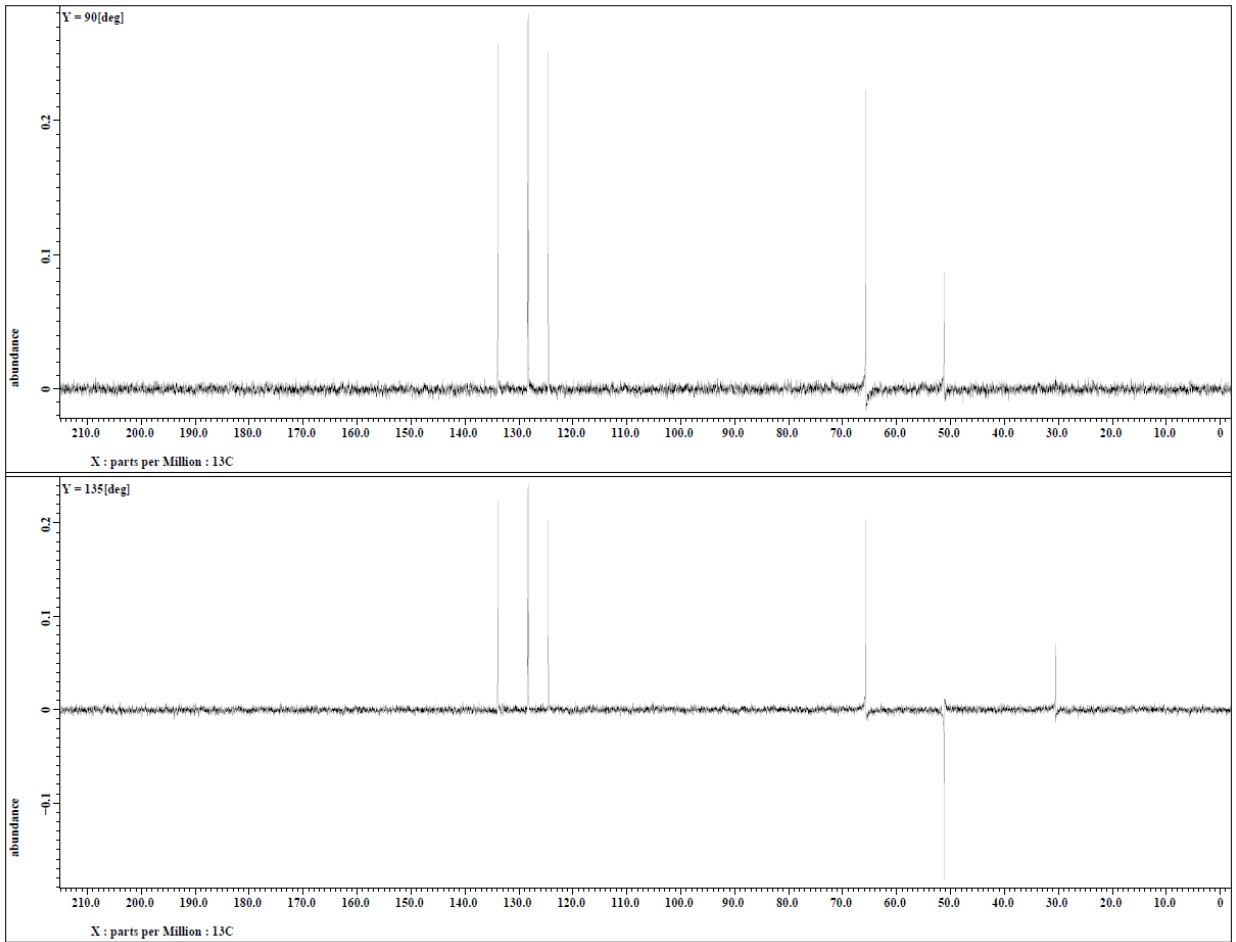

➤ HPLC of corresponding aldol compounds Catalyzed by 8aa taken by chiral column

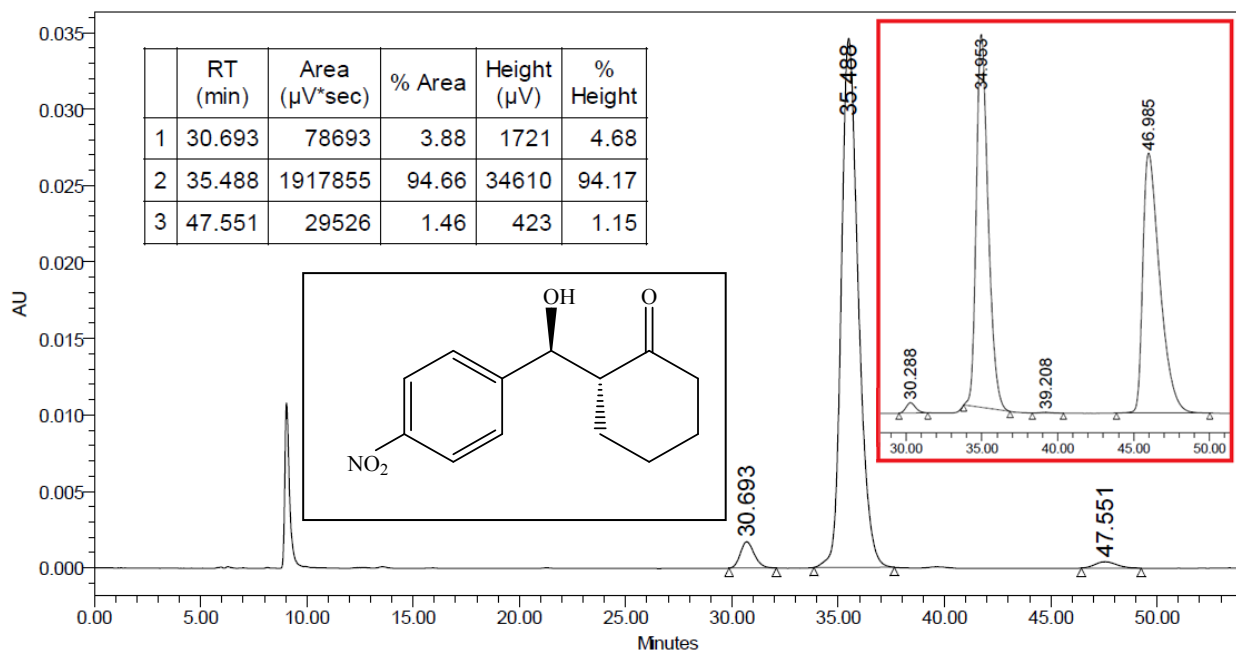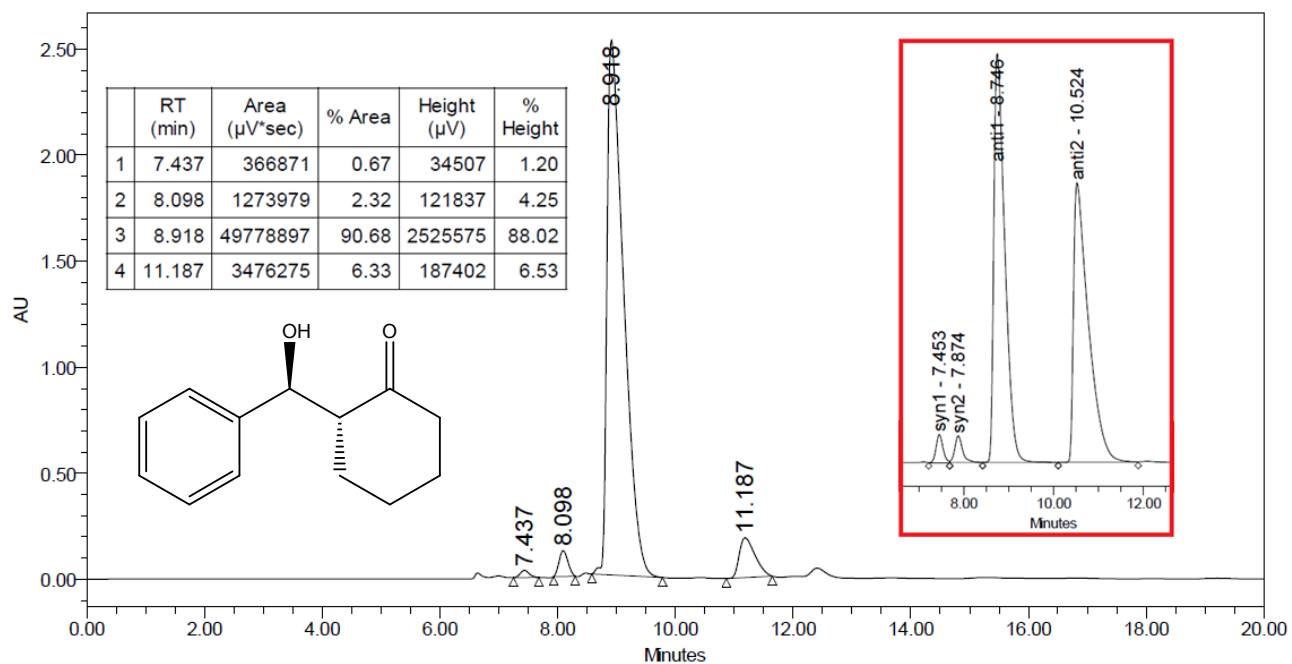

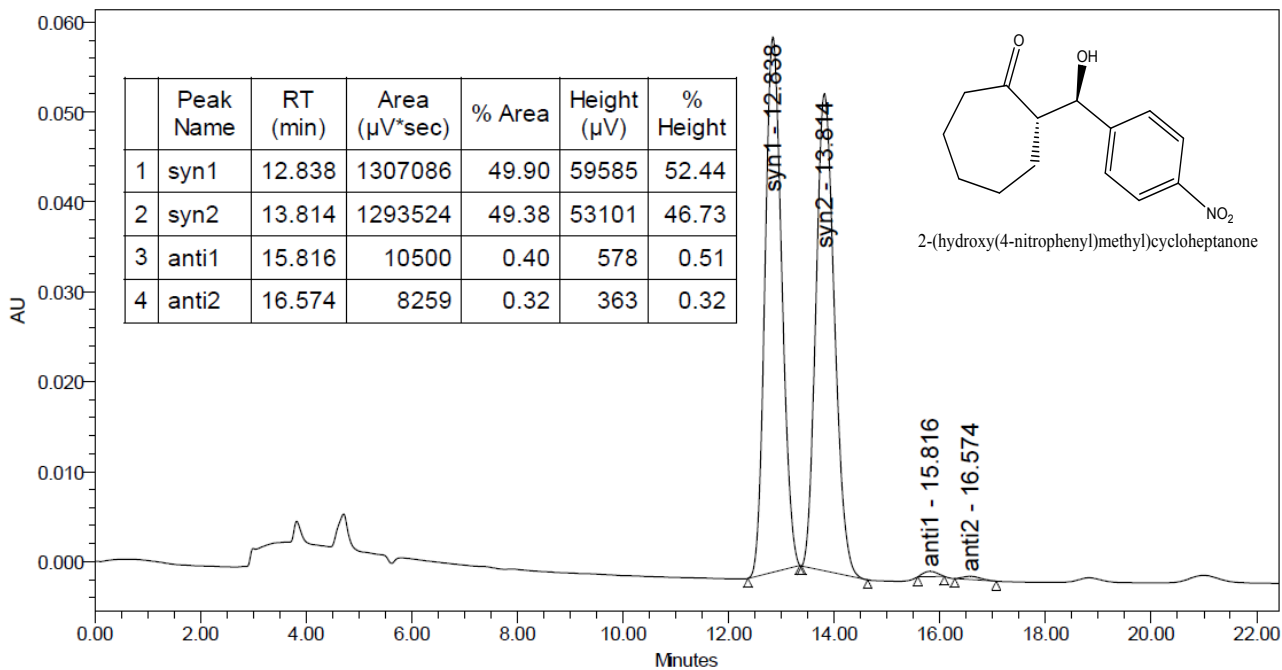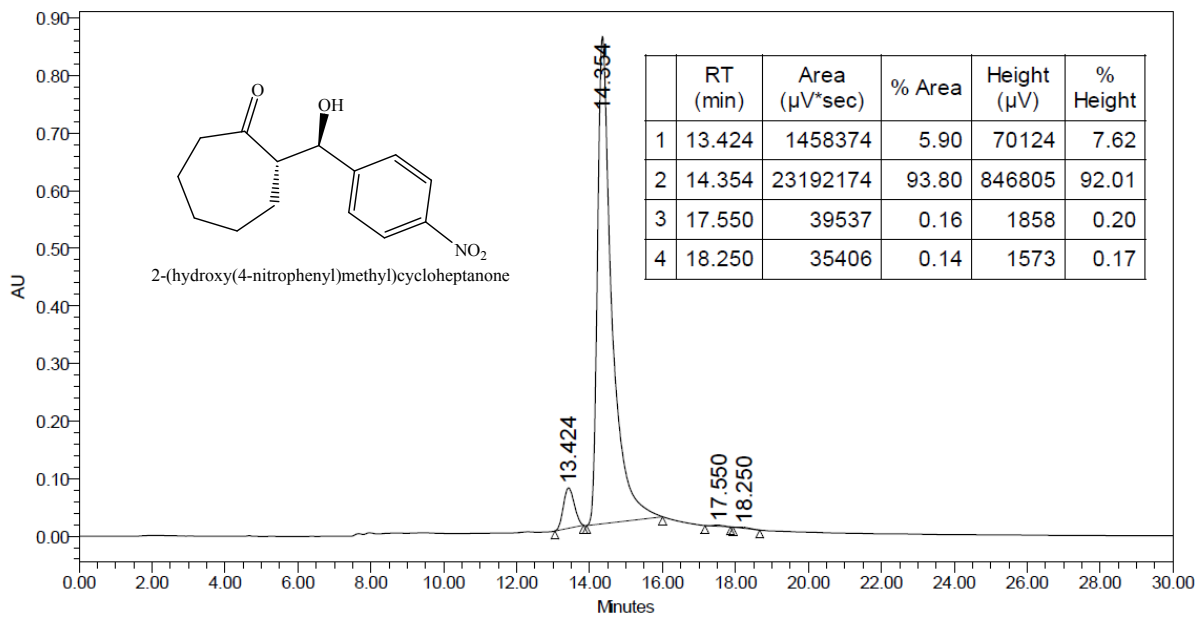

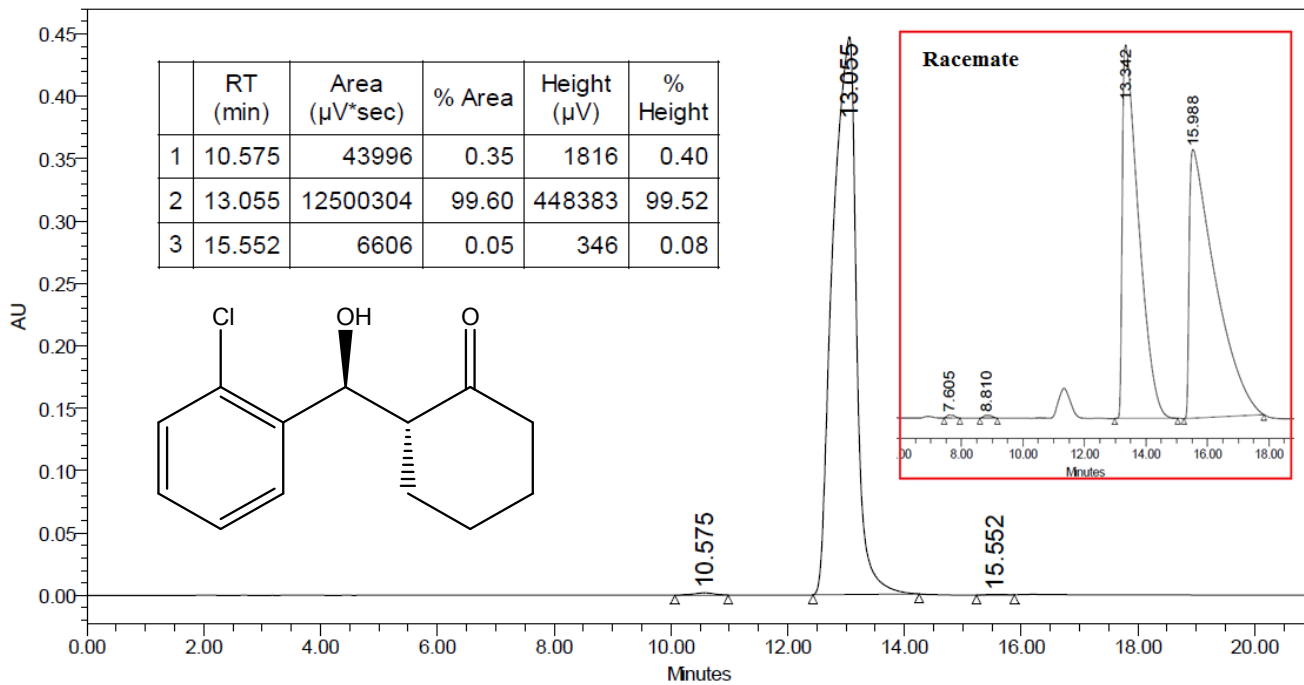

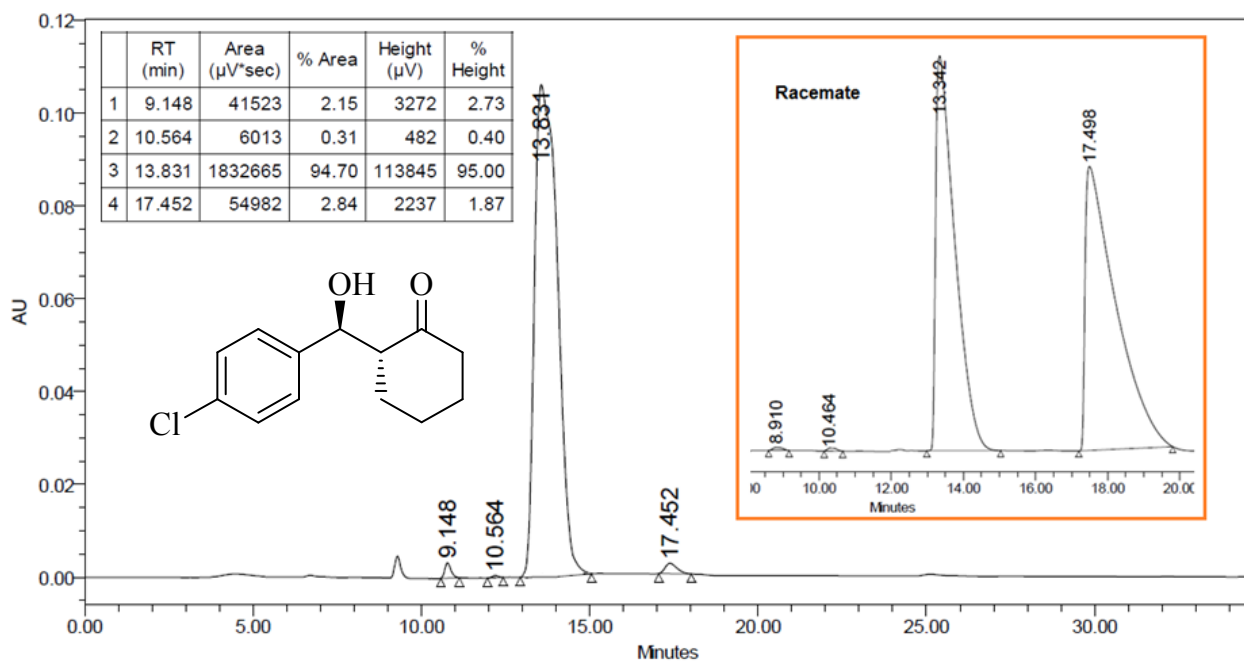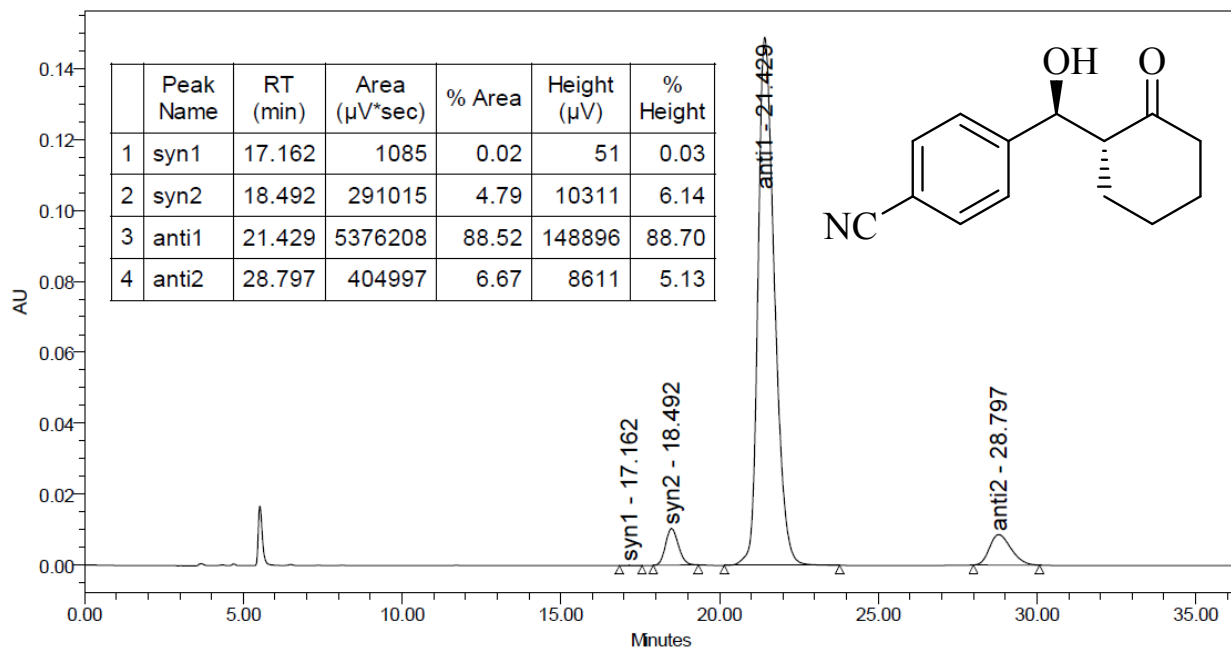



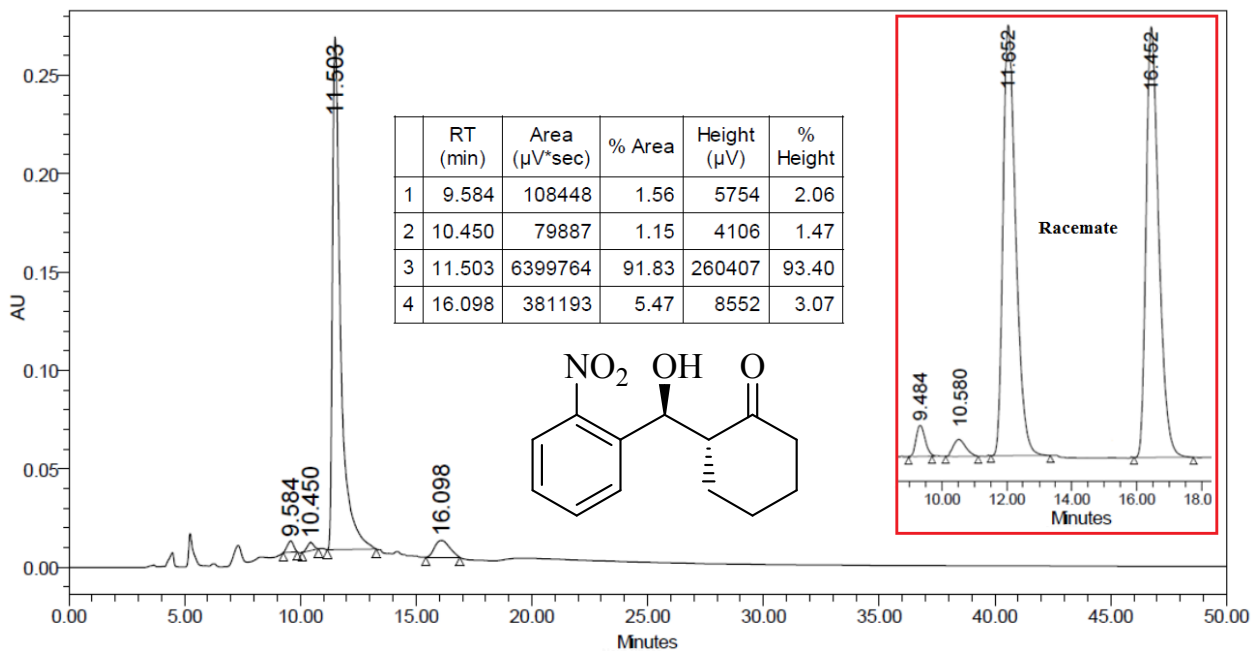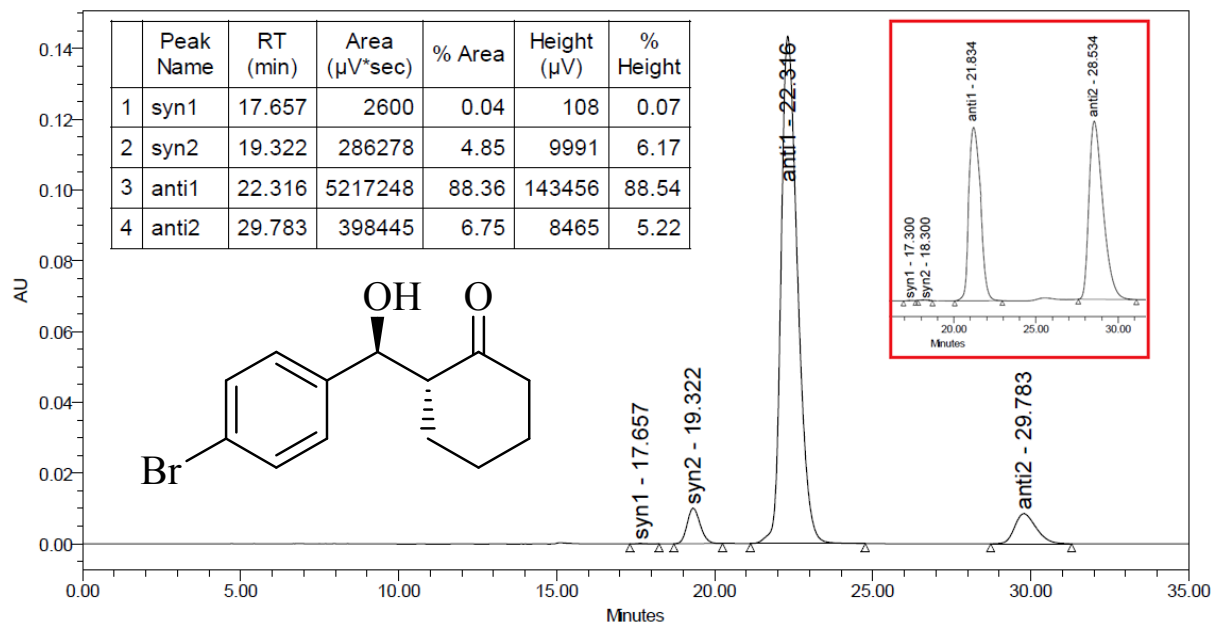

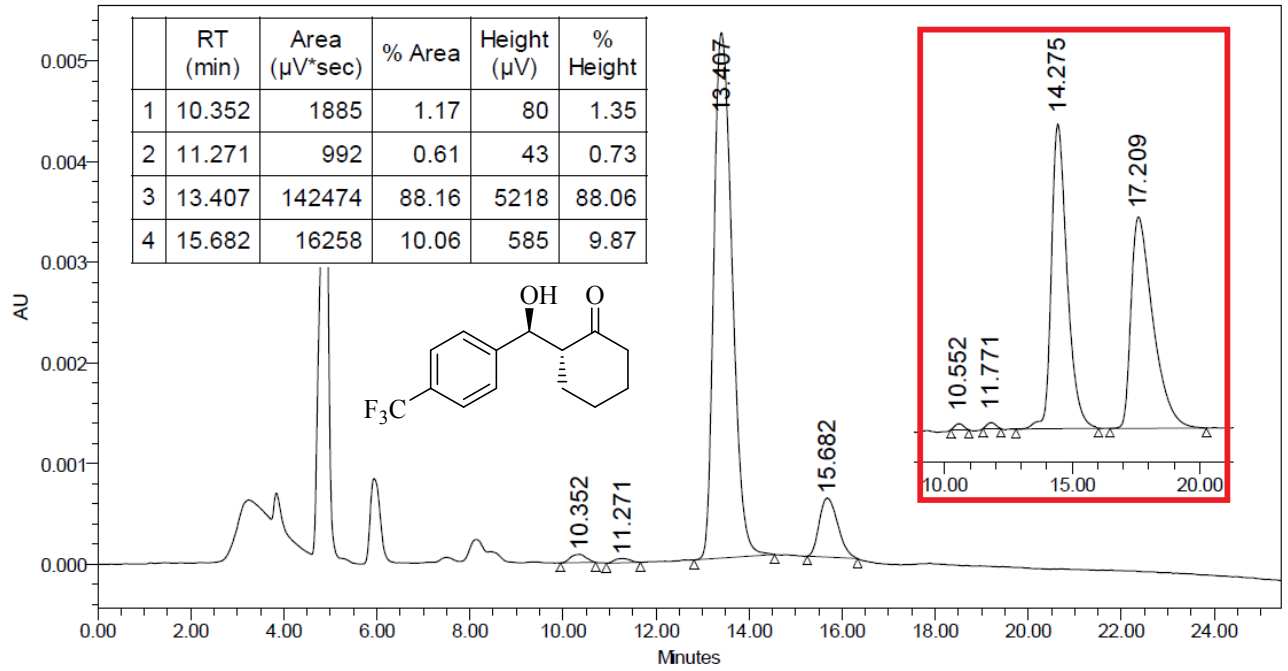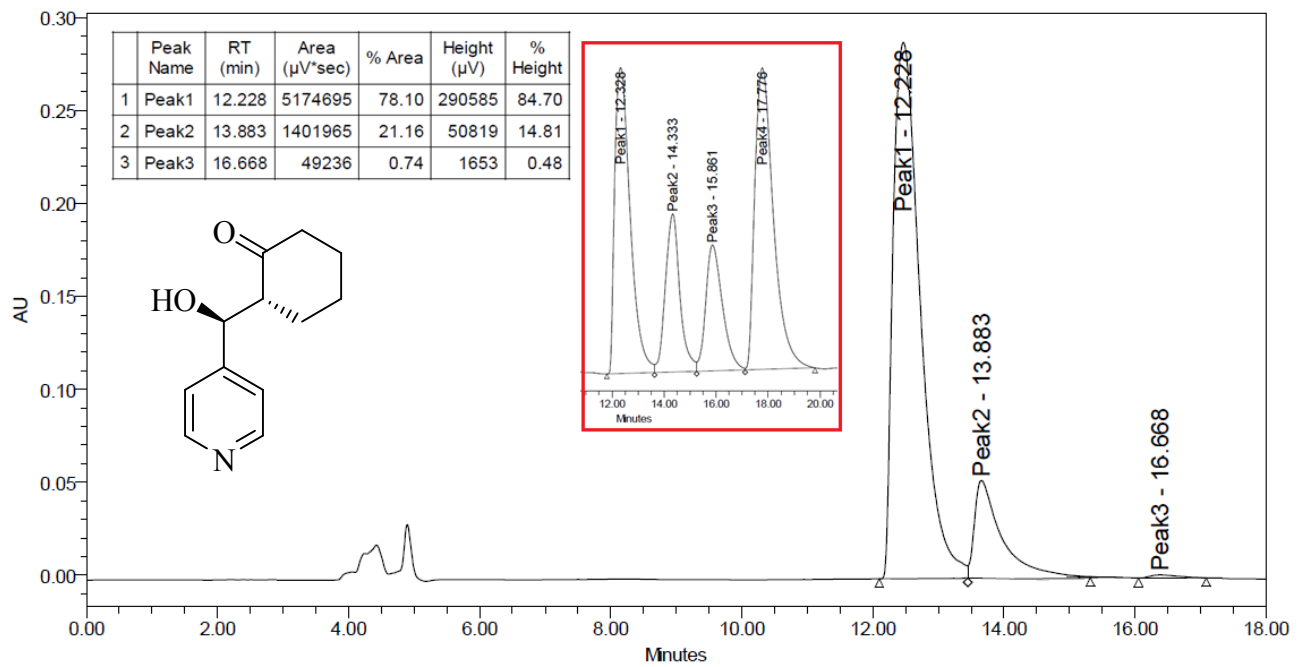



➤ (R)-2-((S)-hydroxy(4-methoxyphenyl)methyl)cyclohexanone cat. 8aa

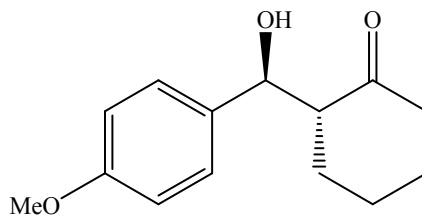

| SAMPLE INFORMATION |                           |                  |                           |
|--------------------|---------------------------|------------------|---------------------------|
| Sample Name:       | p-Anisaldehyde+Cyhex(8aa) | Acquired By:     | Breeze                    |
| Sample Type:       | Unknown                   | Date Acquired:   | 5/21/2013 11:55:13 AM MYT |
| Vial:              | 1                         | Acq. Method:     | Saadi                     |
| Injection #:       | 3                         | Date Processed:  | 5/21/2013 12:43:30 PM MYT |
| Injection Volume:  | 10.00 ul                  | Channel Name:    | W2489 ChB                 |
| Run Time:          | 20.00 Minutes             | Sample Set Name: |                           |

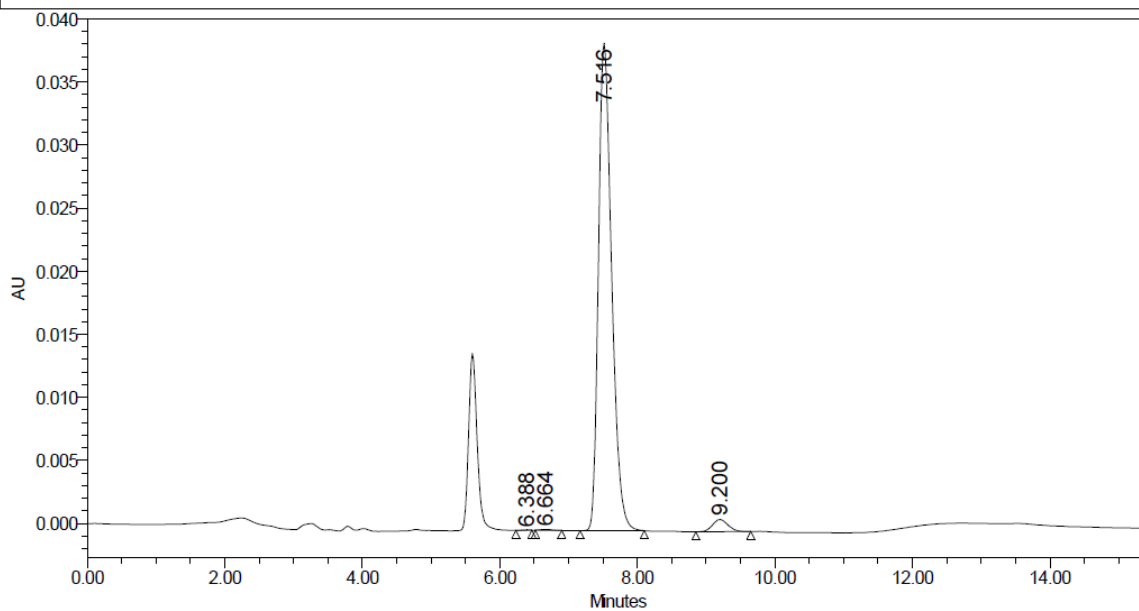

|   | RT (min) | Area (μV*sec) | % Area | Height (μV) | % Height |
|---|----------|---------------|--------|-------------|----------|
| 1 | 6.388    | 163           | 0.03   | 26          | 0.06     |
| 2 | 6.664    | 788           | 0.15   | 66          | 0.17     |
| 3 | 7.516    | 515357        | 97.00  | 38623       | 97.34    |
| 4 | 9.200    | 14995         | 2.82   | 963         | 2.43     |

1) (R)-2-((S)-hydroxy(4-nitrophenyl)methyl)cyclohexanone catalyzed by cat. **8aa(z)**

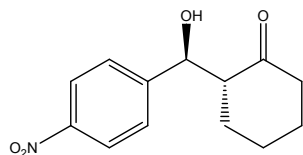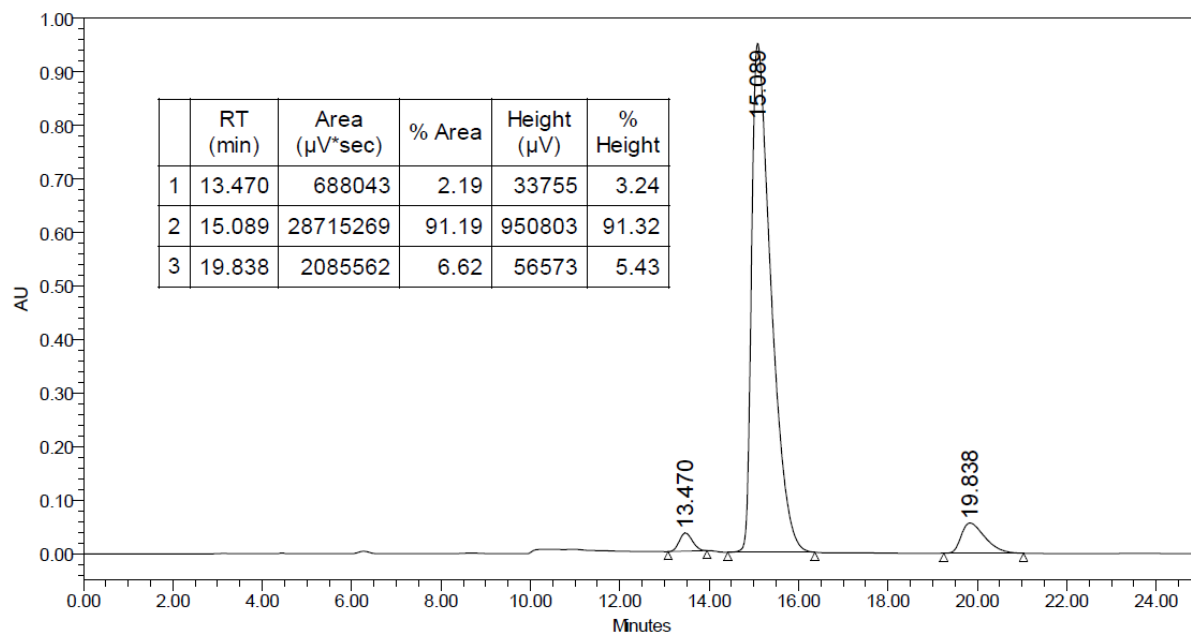

2) (R)-2-((S)-hydroxy(4-nitrophenyl)methyl)cyclohexanone catalyzed by cat.5aa

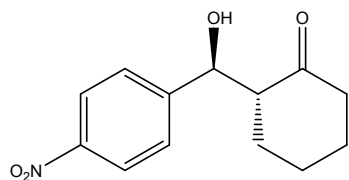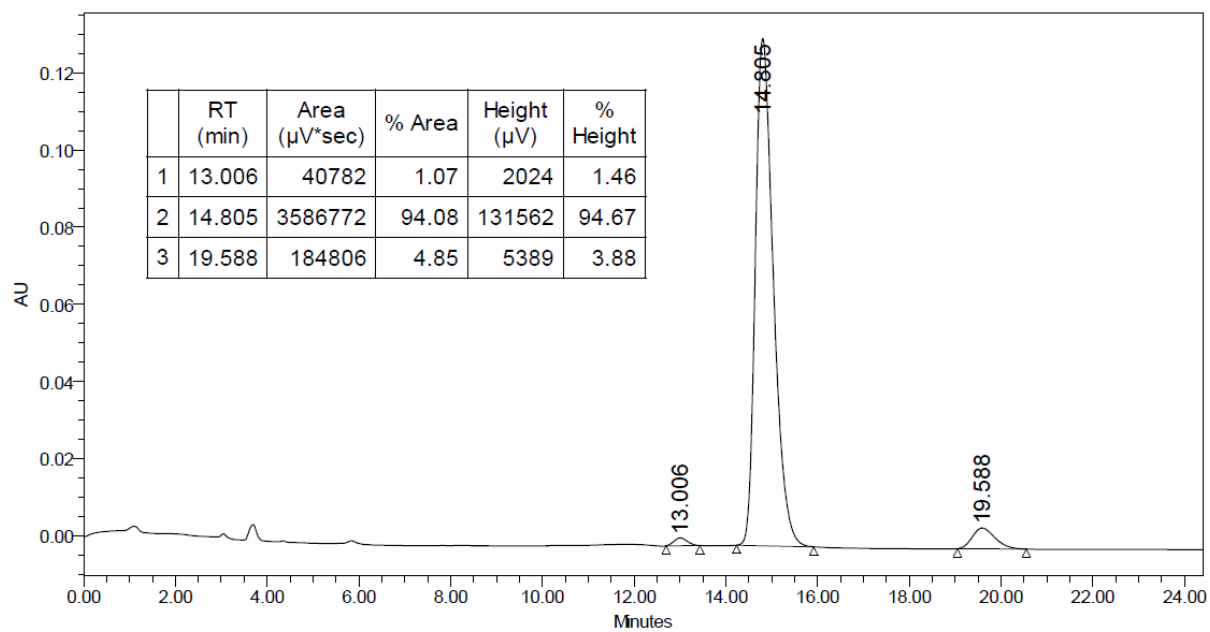

3) (R)-2-((S)-hydroxy(4-nitrophenyl)methyl)cyclohexanone catalyzed by cat.3aa

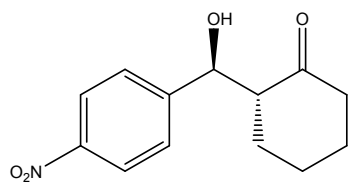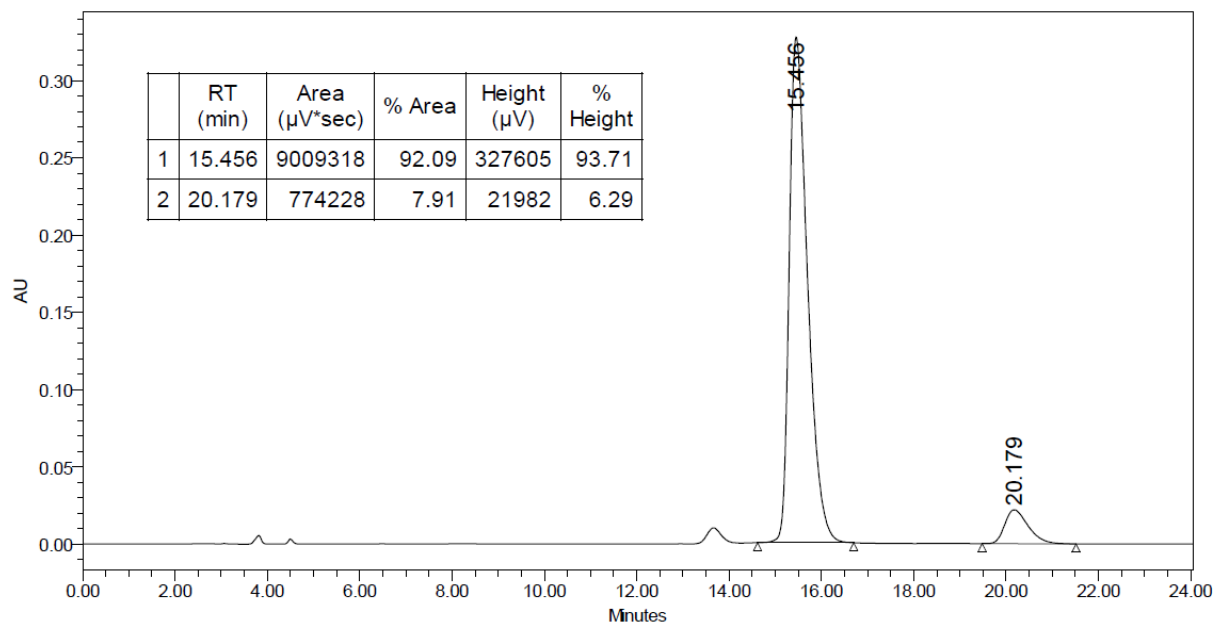

➤ Aldol reaction Catalyzed by Fmoc-3aa-Resin

| SAMPLE INFORMATION |                                |                  |                          |  |  |
|--------------------|--------------------------------|------------------|--------------------------|--|--|
| Sample Name:       | 4Nitro+cyhex(Fmoc-K.L.H-Resin) | Acquired By:     | Breeze                   |  |  |
| Sample Type:       | Unknown                        | Date Acquired:   | 11/9/2012 4:55:38 PM MYT |  |  |
| Vial:              | 1                              | Acq. Method:     | Saadi                    |  |  |
| Injection #:       | 11                             | Date Processed:  | 11/9/2012 5:47:50 PM MYT |  |  |
| Injection Volume:  | 10.00 ul                       | Channel Name:    | W2489 ChB                |  |  |
| Run Time:          | 60.00 Minutes                  | Sample Set Name: |                          |  |  |

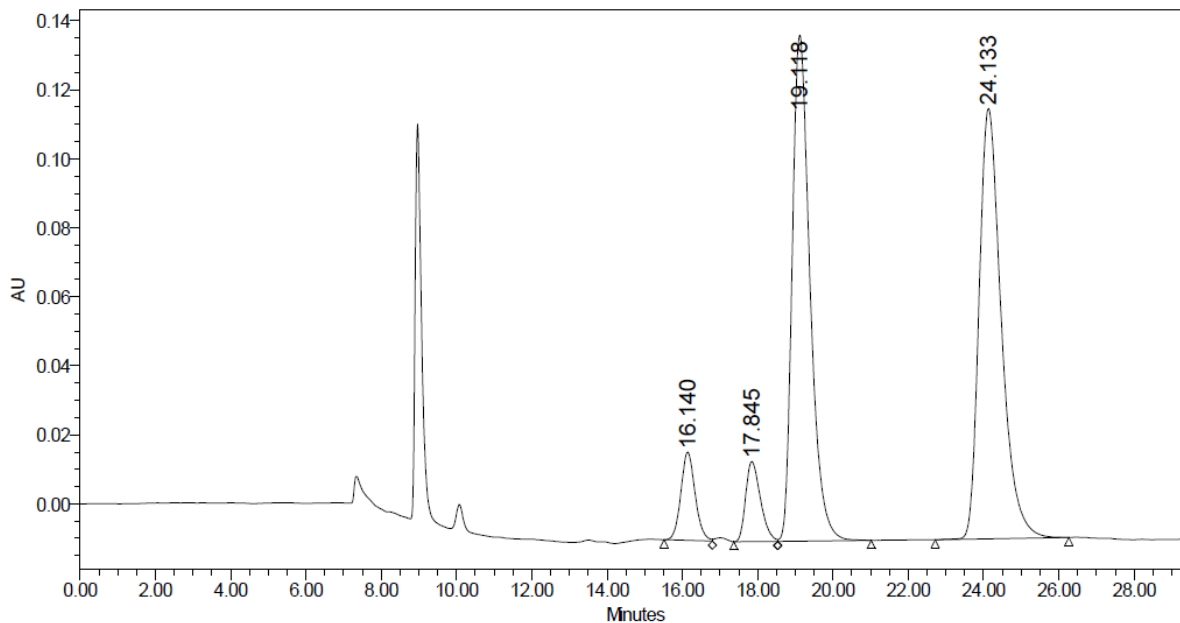

|   | RT (min) | Area ( $\mu\text{V} \cdot \text{sec}$ ) | % Area | Height ( $\mu\text{V}$ ) | % Height |
|---|----------|-----------------------------------------|--------|--------------------------|----------|
| 1 | 16.140   | 673921                                  | 6.00   | 25616                    | 8.00     |
| 2 | 17.845   | 633131                                  | 5.64   | 23222                    | 7.25     |
| 3 | 19.118   | 4813702                                 | 42.84  | 146662                   | 45.79    |
| 4 | 24.133   | 5114696                                 | 45.52  | 124758                   | 38.96    |



## SAMPLE INFORMATION

|                                |                                           |
|--------------------------------|-------------------------------------------|
| Sample Name: 4NitroBen+acetone | Acquired By: Breeze                       |
| Sample Type: Unknown           | Date Acquired: 4/12/2013 11:20:31 AM MYT  |
| Vial: 1                        | Acq. Method: Saadi                        |
| Injection #: 3                 | Date Processed: 4/12/2013 12:08:00 PM MYT |
| Injection Volume: 0.00 ul      | Channel Name: W2489 ChA                   |
| Run Time: 60.00 Minutes        | Sample Set Name:                          |

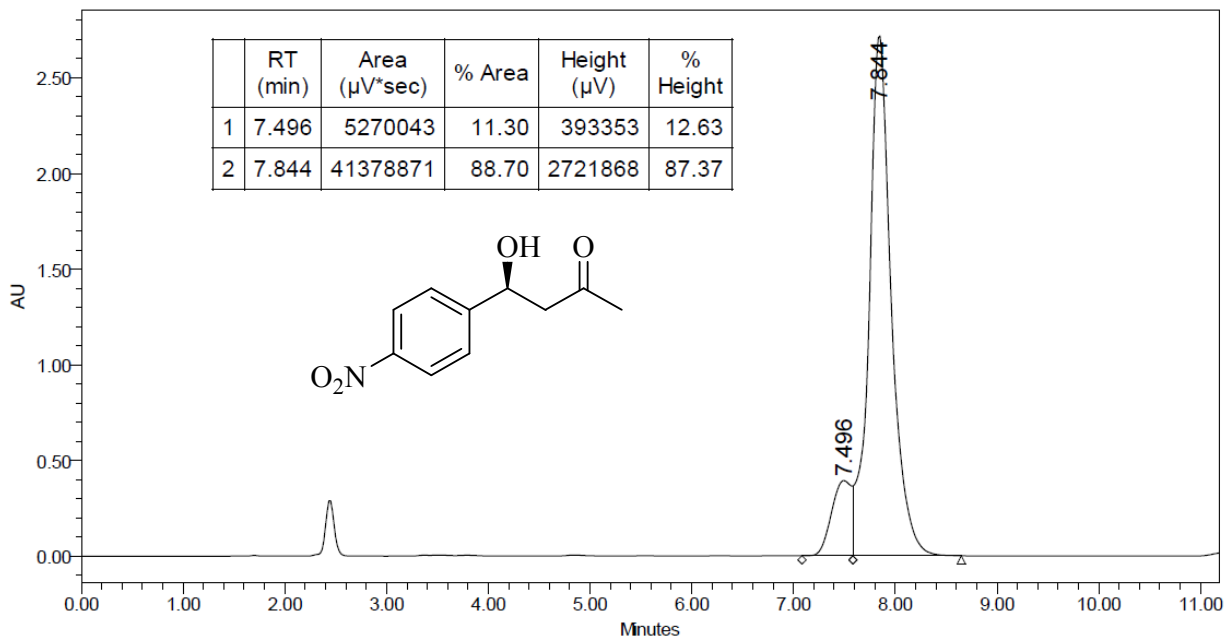

## SAMPLE INFORMATION

|                   |                             |                  |                           |
|-------------------|-----------------------------|------------------|---------------------------|
| Sample Name:      | 2Nitrobenz +acetone(8aa)ADH | Acquired By:     | Breeze                    |
| Sample Type:      | Unknown                     | Date Acquired:   | 3/29/2013 10:12:32 AM MYT |
| Vial:             | 1                           | Acq. Method:     | Saadi                     |
| Injection #:      | 2                           | Date Processed:  | 3/29/2013 12:25:52 PM MYT |
| Injection Volume: | 0.00 ul                     | Channel Name:    | W2489 ChA                 |
| Run Time:         | 60.00 Minutes               | Sample Set Name: |                           |

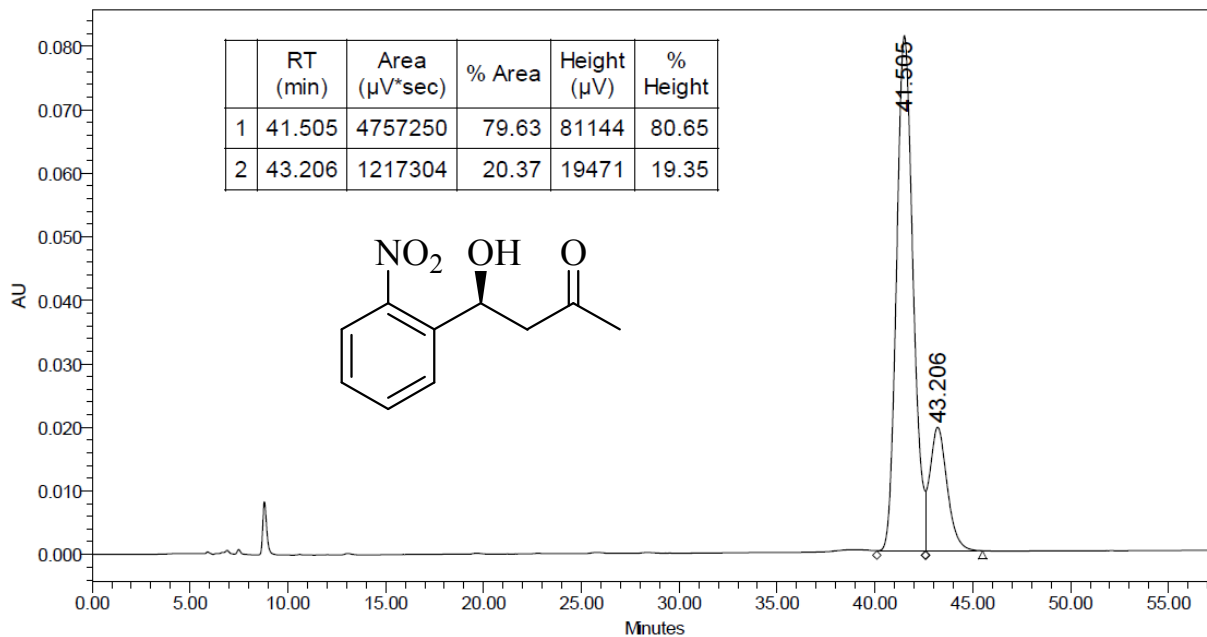

## SAMPLE INFORMATION

|                   |                           |                  |                          |
|-------------------|---------------------------|------------------|--------------------------|
| Sample Name:      | 4Cl-benz +acetone(8aa)ADH | Acquired By:     | Breeze                   |
| Sample Type:      | Unknown                   | Date Acquired:   | 3/29/2013 1:15:31 PM MYT |
| Vial:             | 1                         | Acq. Method:     | Saadi                    |
| Injection #:      | 5                         | Date Processed:  | 3/29/2013 2:09:04 PM MYT |
| Injection Volume: | 0.00 ul                   | Channel Name:    | W2489 ChA                |
| Run Time:         | 60.00 Minutes             | Sample Set Name: |                          |

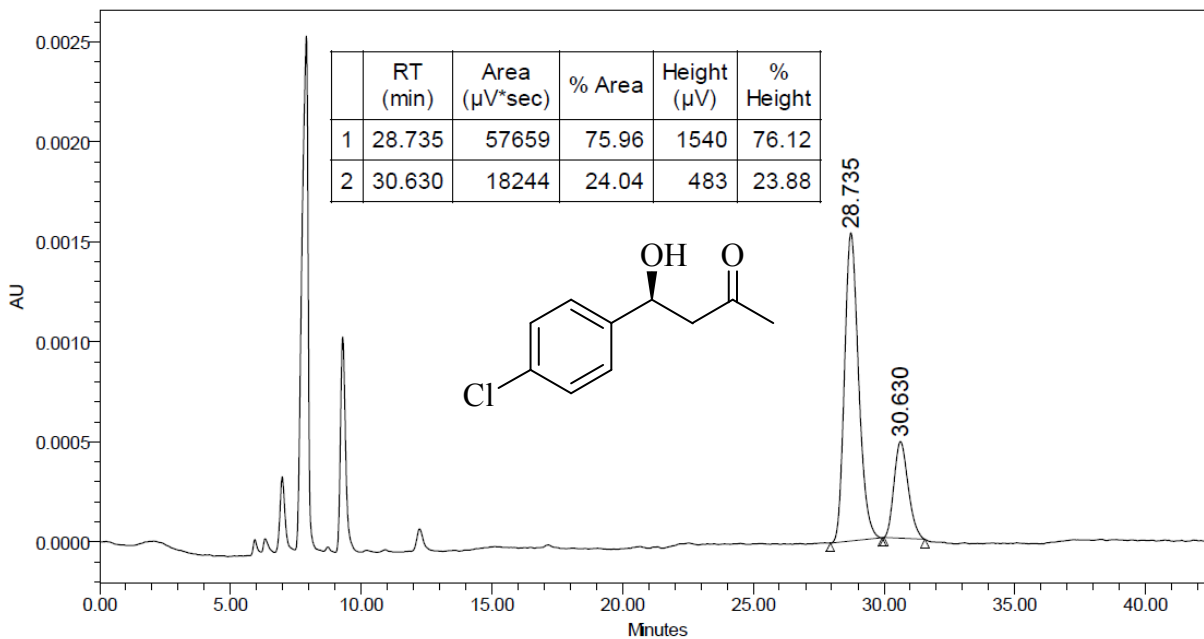

## SAMPLE INFORMATION

Sample Name: 4CF3Ben+acetone  
 Sample Type: Unknown  
 Vial: 1  
 Injection #: 5  
 Injection Volume: 0.00 ul  
 Run Time: 60.00 Minutes

Acquired By: Breeze  
 Date Acquired: 4/1/2013 12:30:28 PM MYT  
 Acq. Method: Saadi  
 Date Processed: 4/1/2013 5:17:38 PM MYT  
 Channel Name: W2489 ChA  
 Sample Set Name:

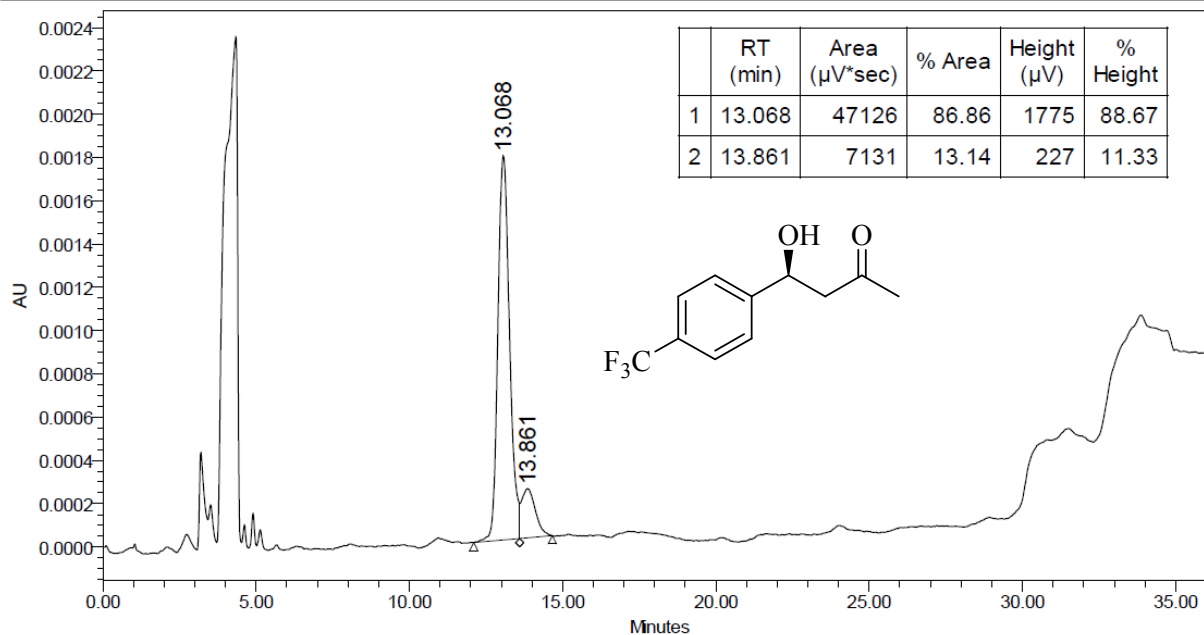

## SAMPLE INFORMATION

Sample Name: 4BrBen+acetone  
 Sample Type: Unknown  
 Vial: 1  
 Injection #: 9  
 Injection Volume: 0.00 ul  
 Run Time: 60.00 Minutes

Acquired By: Breeze  
 Date Acquired: 3/29/2013 3:41:04 PM MYT  
 Acq. Method: Saadi  
 Date Processed: 4/3/2013 6:29:39 PM MYT  
 Channel Name: W2489 ChA  
 Sample Set Name:

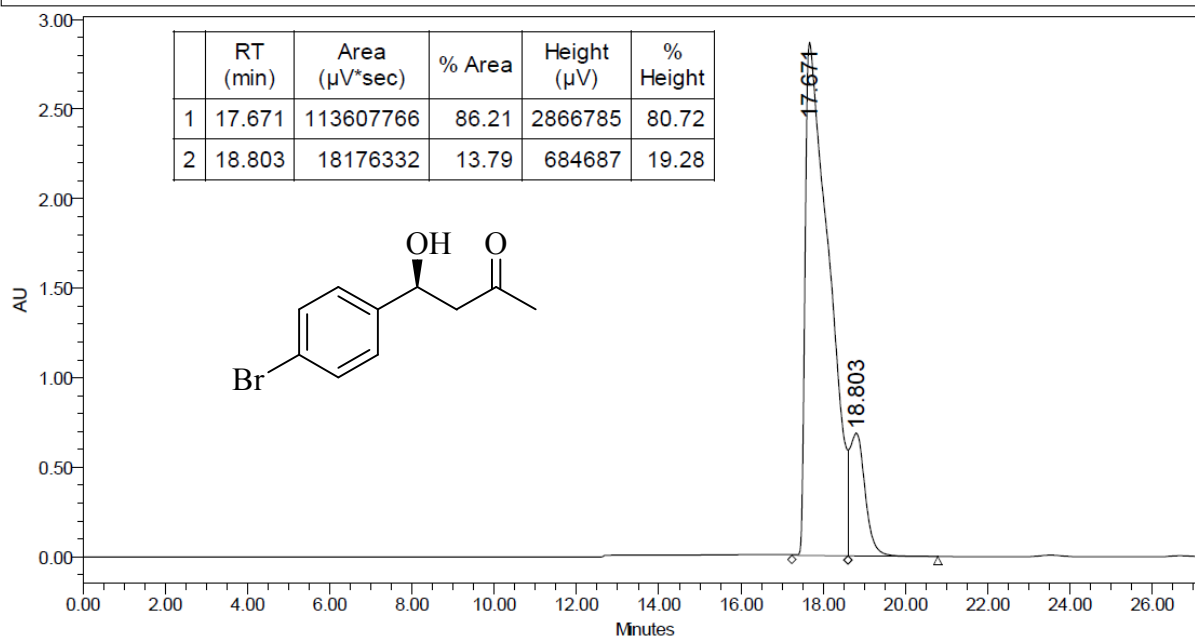

#### 4) Octapeptide purity:

*Pro-Glu-Leu-Phe-Val-Lys-Leu-His-NH<sub>2</sub>*

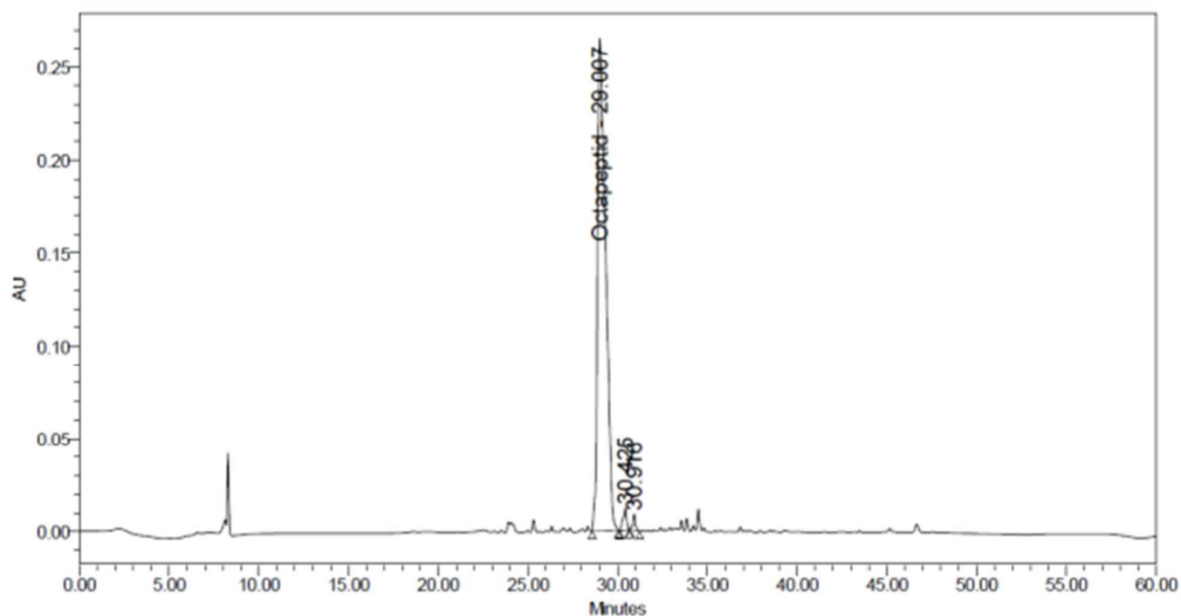

|   | Peak Name  | RT (min) | Area (μV*sec) | % Area | Height (μV) | % Height |
|---|------------|----------|---------------|--------|-------------|----------|
| 1 | Octapeptid | 29.007   | 8319498       | 97.13  | 265520      | 92.84    |
| 2 |            | 30.425   | 158948        | 1.86   | 11822       | 4.13     |
| 3 |            | 30.916   | 86726         | 1.01   | 8662        | 3.03     |

Octapeptide Mass:

$$[\alpha]_{\text{Na589}}^{20} = + 2.86 \text{ (c= 5 mg/25ml H}_2\text{O)}$$

*Pro-Glu-Leu-Phe-Val-Lys-Leu-His-NH<sub>2</sub>*

Theory Mol. Wt. calculated by Chemoffice software:

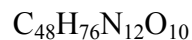

Exact Mass: 980.58

Mol. Wt.: 981.19

m/e: 980.58 (100.0%), 981.58 (56.7%), 982.59 (13.9%), 982.58 (4.4%), 983.59 (3.5%)

And experimental LC- Mass:

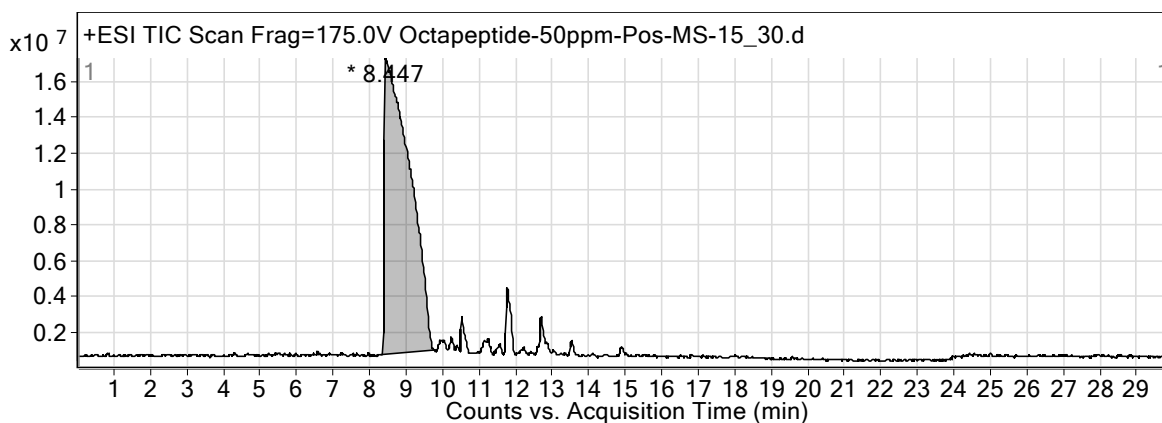

Integration Peak List

| Peak | Start | RT    | End   | Height   | Area      | Area % |
|------|-------|-------|-------|----------|-----------|--------|
| 1    | 8.302 | 8.447 | 9.845 | 16515438 | 793998057 | 100    |

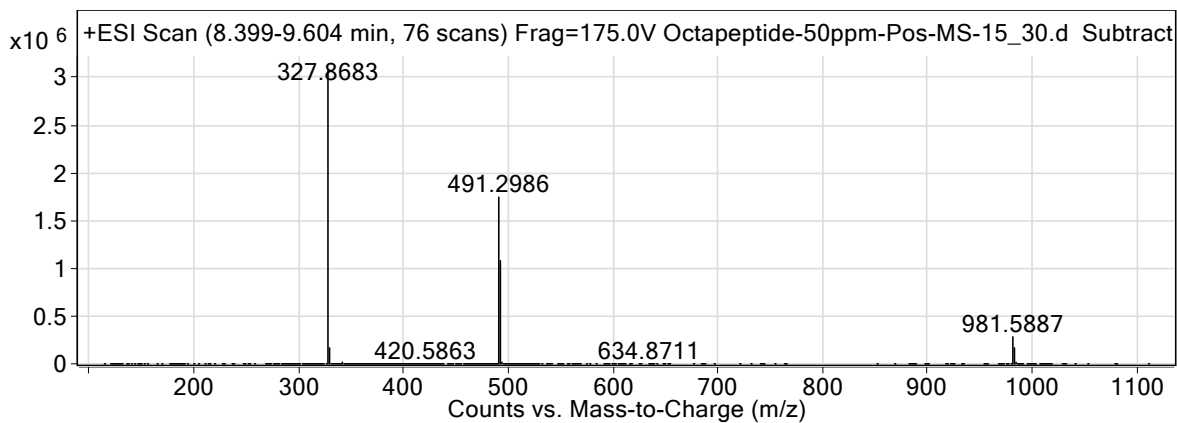

| <i>m/z</i> | <i>z</i> | Abund   |
|------------|----------|---------|
| 327.8683   | 3        | 3069294 |
| 328.0218   | 3        | 201133  |
| 328.2025   | 3        | 1918582 |
| 328.5367   | 3        | 680737  |
| 328.8709   | 3        | 168530  |
| 491.2986   | 2        | 1749495 |
| 491.8      | 2        | 1076452 |
| 492.3018   | 2        | 336858  |
| 981.5887   | 1        | 290675  |
| 982.5915   | 1        | 172135  |

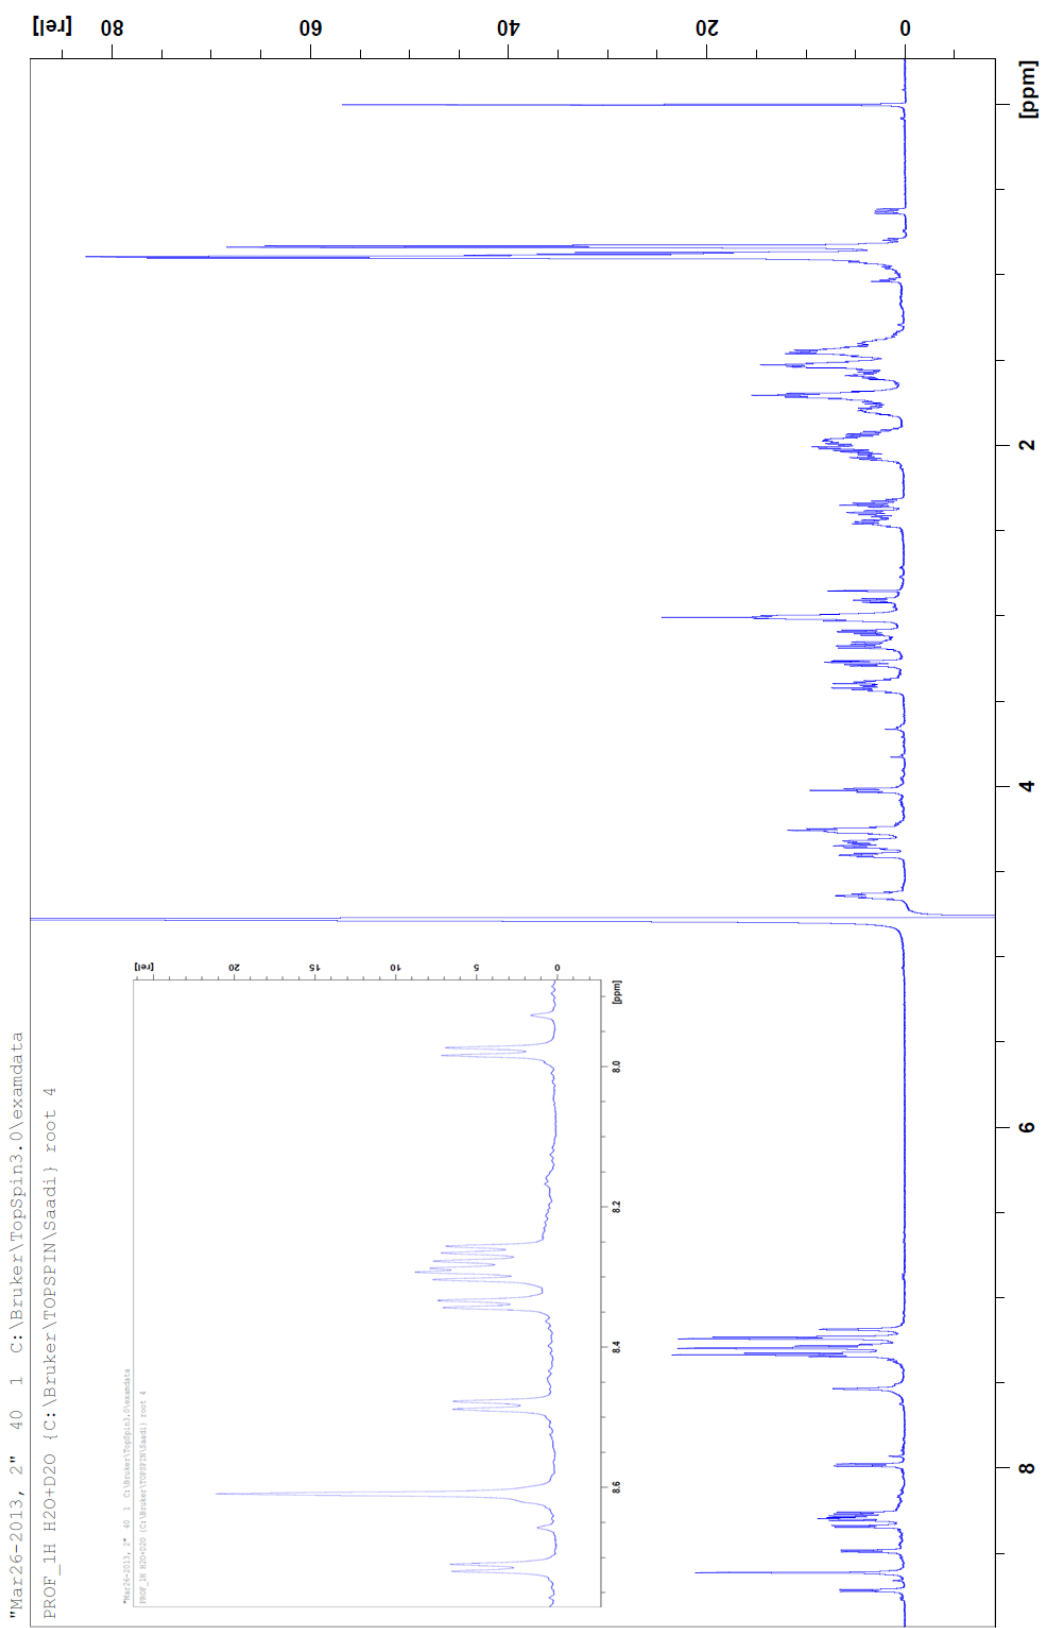



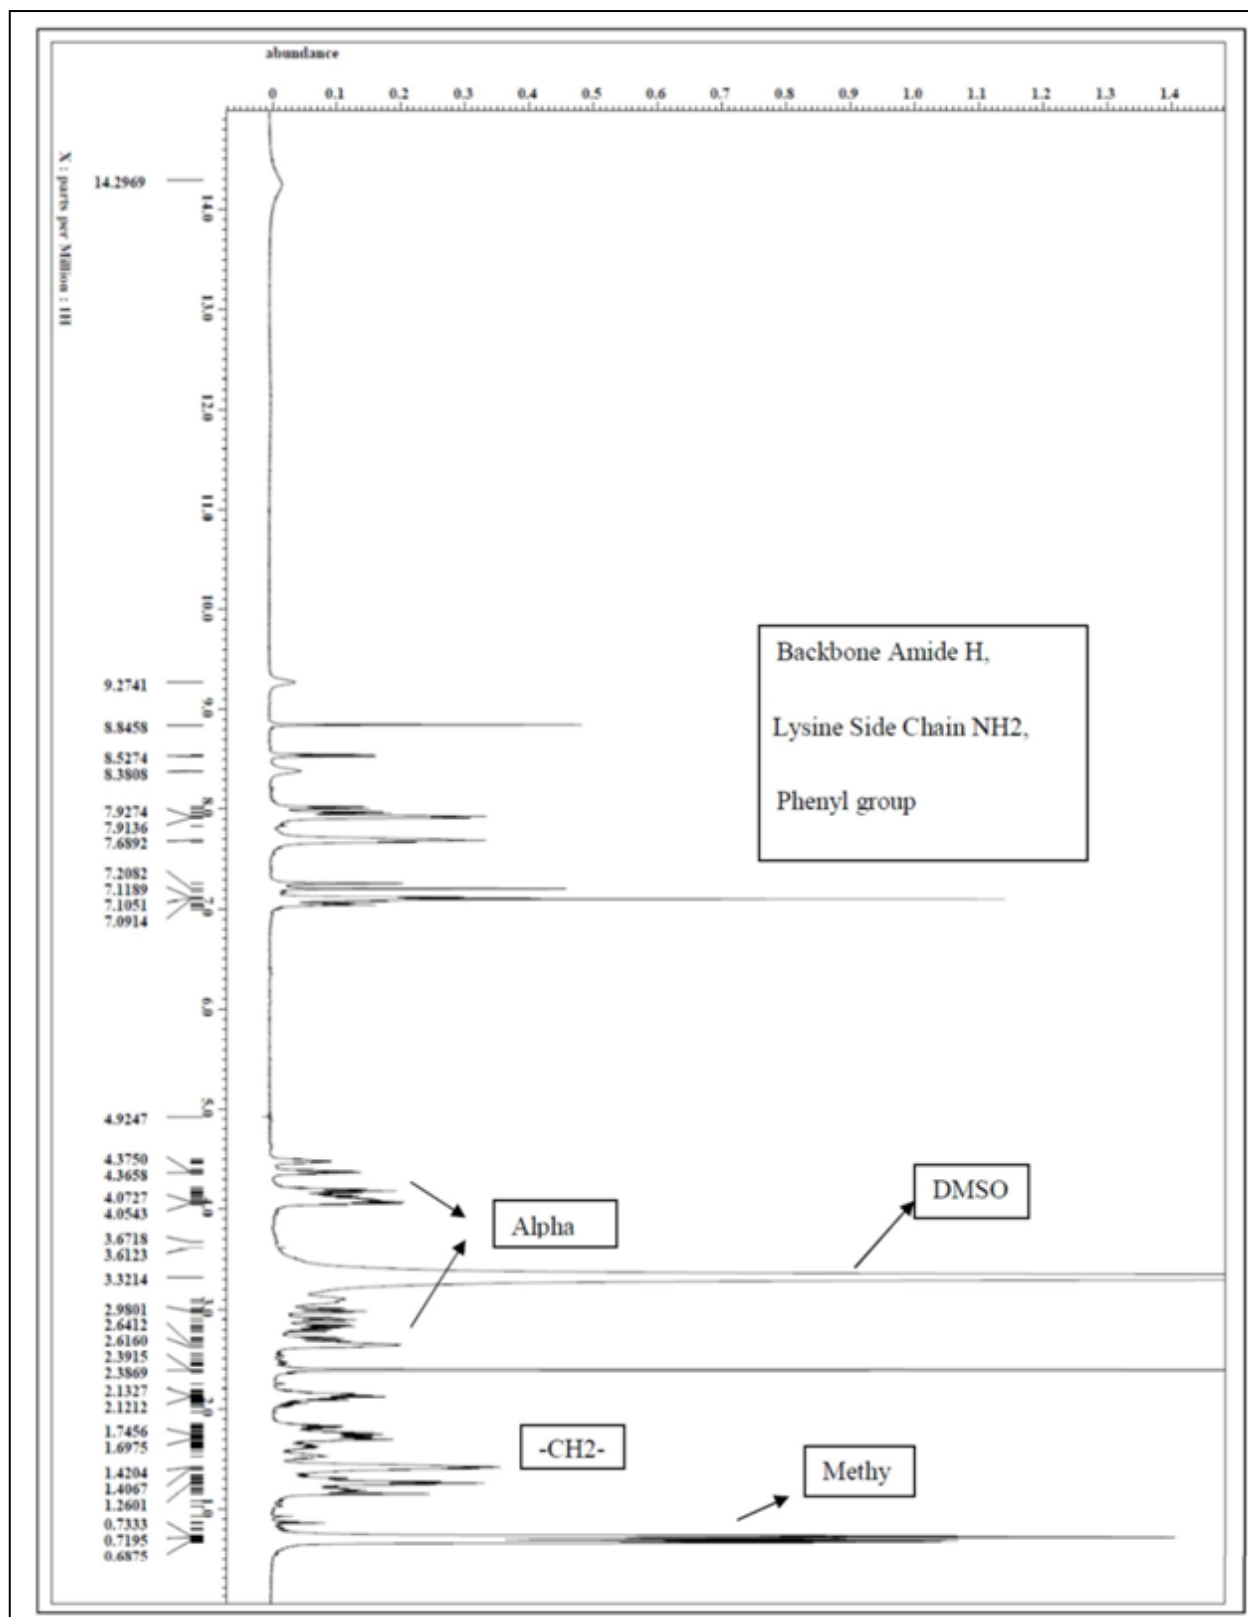

## 2- Aldol reaction catalyzed by PE-16aa

### 1-1 (R)-2-((S)-hydroxy(4-nitrophenyl)methyl)cyclohexanone Catalyzed by PE-16aa

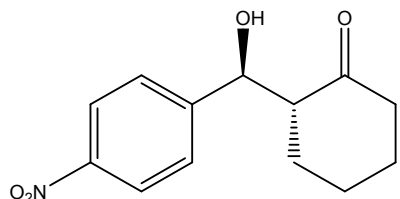

#### SAMPLE INFORMATION

|                   |                 |                  |                           |
|-------------------|-----------------|------------------|---------------------------|
| Sample Name:      | 4.NitroBe+Cyhex | Acquired By:     | Breeze                    |
| Sample Type:      | Unknown         | Date Acquired:   | 8/30/2012 2:04:55 PM MYT  |
| Vial:             | 1               | Acq. Method:     | Saadi                     |
| Injection #:      | 9               | Date Processed:  | 9/11/2012 10:22:37 AM MYT |
| Injection Volume: | 10.00 ul        | Channel Name:    | W2489 ChA                 |
| Run Time:         | 50.10 Minutes   | Sample Set Name: |                           |

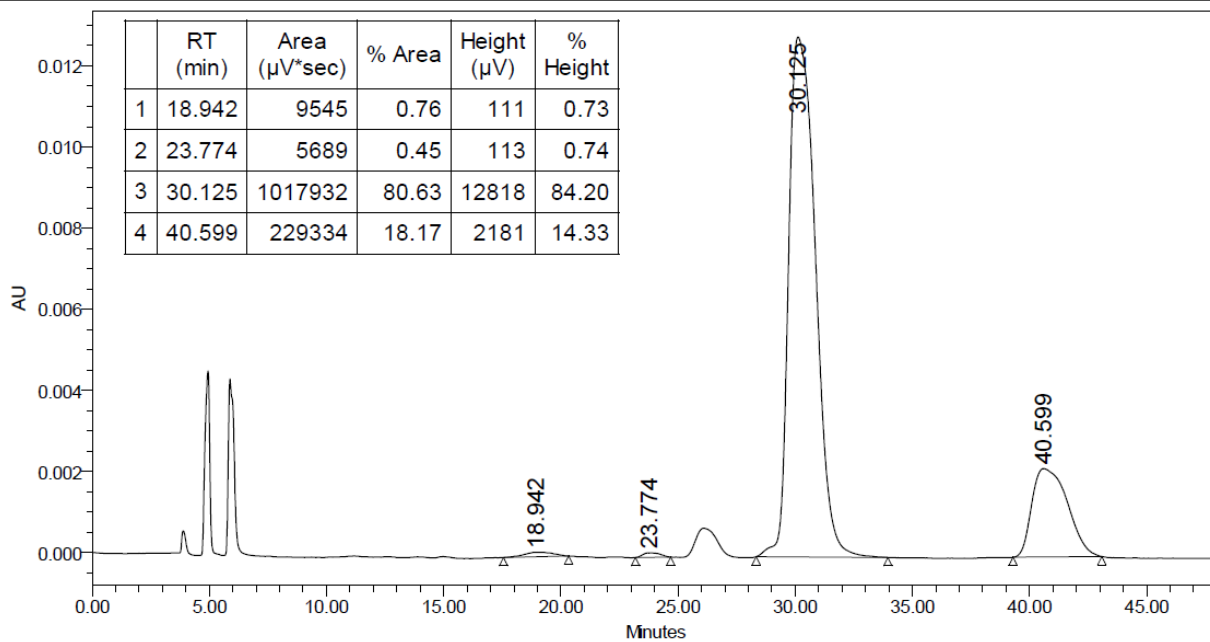

1-2 (S)-2-((S)-(4-chlorophenyl)(XXXydroxyl)methyl)cyclohexanone

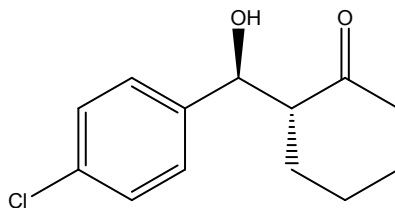

SAMPLE INFORMATION

|                   |                |                  |                          |
|-------------------|----------------|------------------|--------------------------|
| Sample Name:      | 4Cl-benz+Cyhex | Acquired By:     | Breeze                   |
| Sample Type:      | Unknown        | Date Acquired:   | 7/11/2012 1:48:35 PM MYT |
| Vial:             | 1              | Acq. Method:     | Saadi                    |
| Injection #:      | 5              | Date Processed:  | 7/27/2012 5:48:53 PM MYT |
| Injection Volume: | 10.00 ul       | Channel Name:    | W2489 ChA                |
| Run Time:         | 50.00 Minutes  | Sample Set Name: |                          |

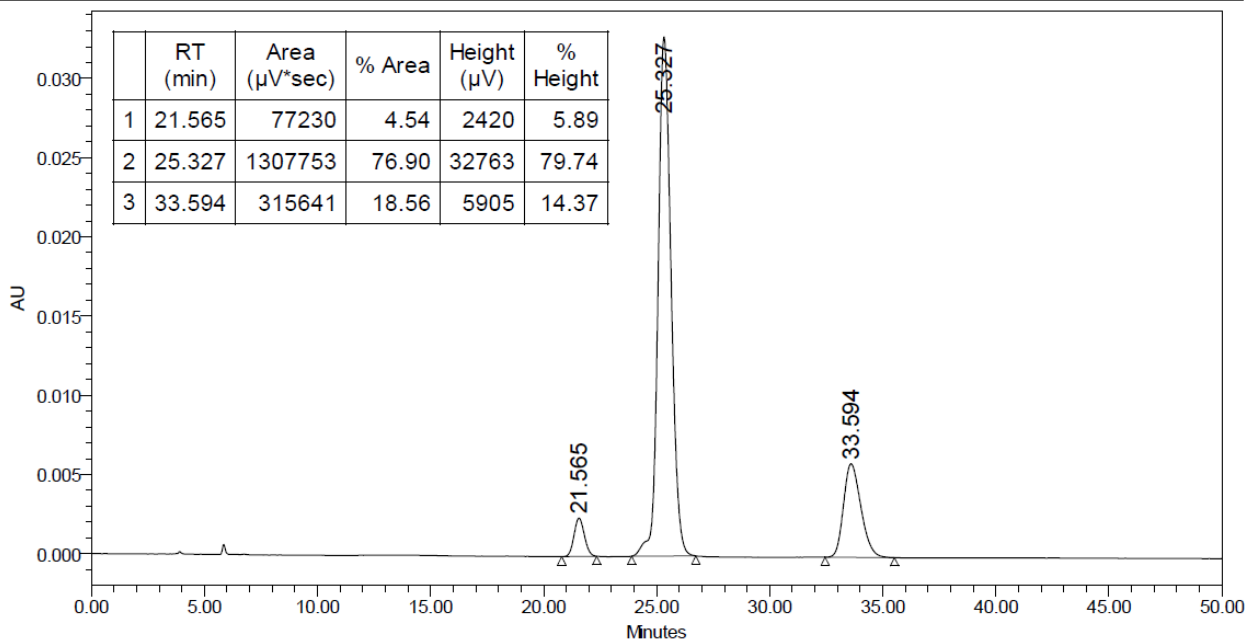

1-3 2-[Hydroxy-(4-cyano-phenyl)-methyl]-cyclohexanone

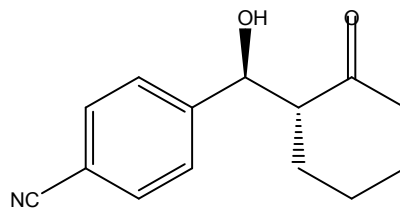

| SAMPLE INFORMATION |               |                  |                          |  |  |
|--------------------|---------------|------------------|--------------------------|--|--|
| Sample Name:       | 4.CN-Be+Cyhex | Acquired By:     | Breeze                   |  |  |
| Sample Type:       | Unknown       | Date Acquired:   | 8/30/2012 2:54:24 PM MYT |  |  |
| Vial:              | 1             | Acq. Method:     | Saadi                    |  |  |
| Injection #:       | 10            | Date Processed:  | 8/30/2012 4:29:15 PM MYT |  |  |
| Injection Volume:  | 10.00 ul      | Channel Name:    | W2489 ChA                |  |  |
| Run Time:          | 50.10 Minutes | Sample Set Name: |                          |  |  |

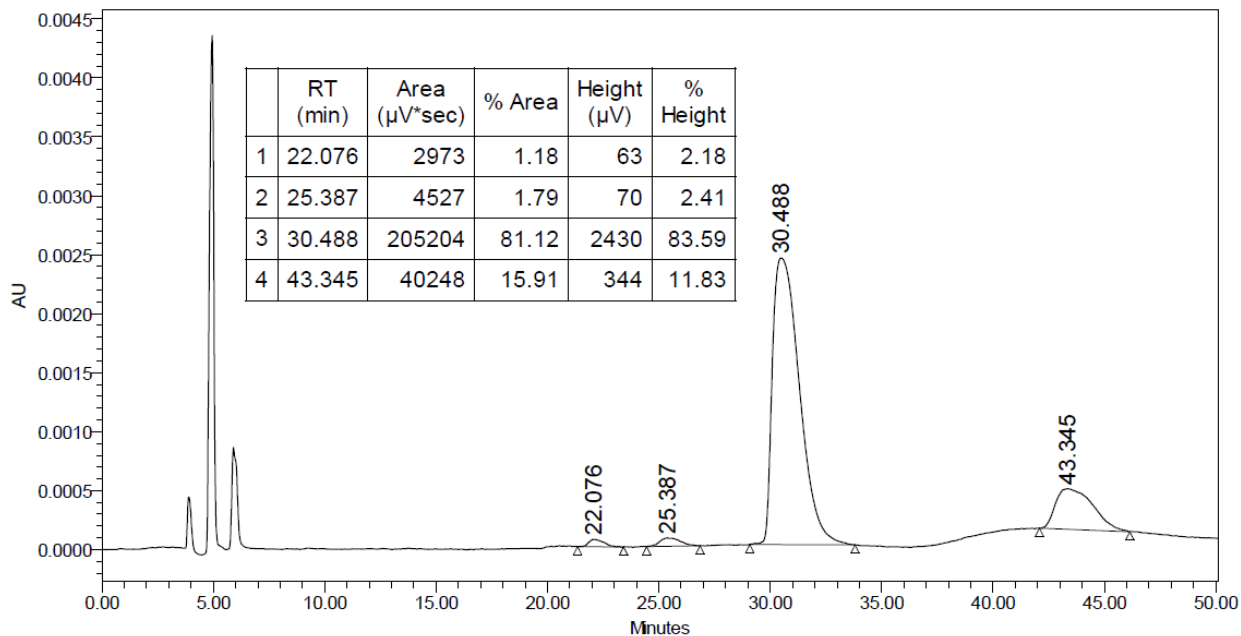

1-4 (R)-2-((S)-hydroxy(2-nitrophenyl)methyl)cyclohexanone

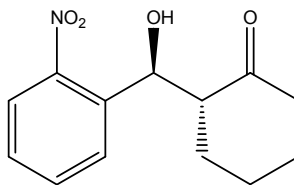

SAMPLE INFORMATION

|                   |                   |                  |                           |
|-------------------|-------------------|------------------|---------------------------|
| Sample Name:      | 2.NitroBenz+Cyhex | Acquired By:     | Breeze                    |
| Sample Type:      | Unknown           | Date Acquired:   | 9/11/2012 4:37:25 PM MYT  |
| Vial:             | 1                 | Acq. Method:     | Saadi                     |
| Injection #:      | 5                 | Date Processed:  | 9/12/2012 12:59:33 PM MYT |
| Injection Volume: | 10.00 ul          | Channel Name:    | W2489 ChA                 |
| Run Time:         | 50.00 Minutes     | Sample Set Name: |                           |

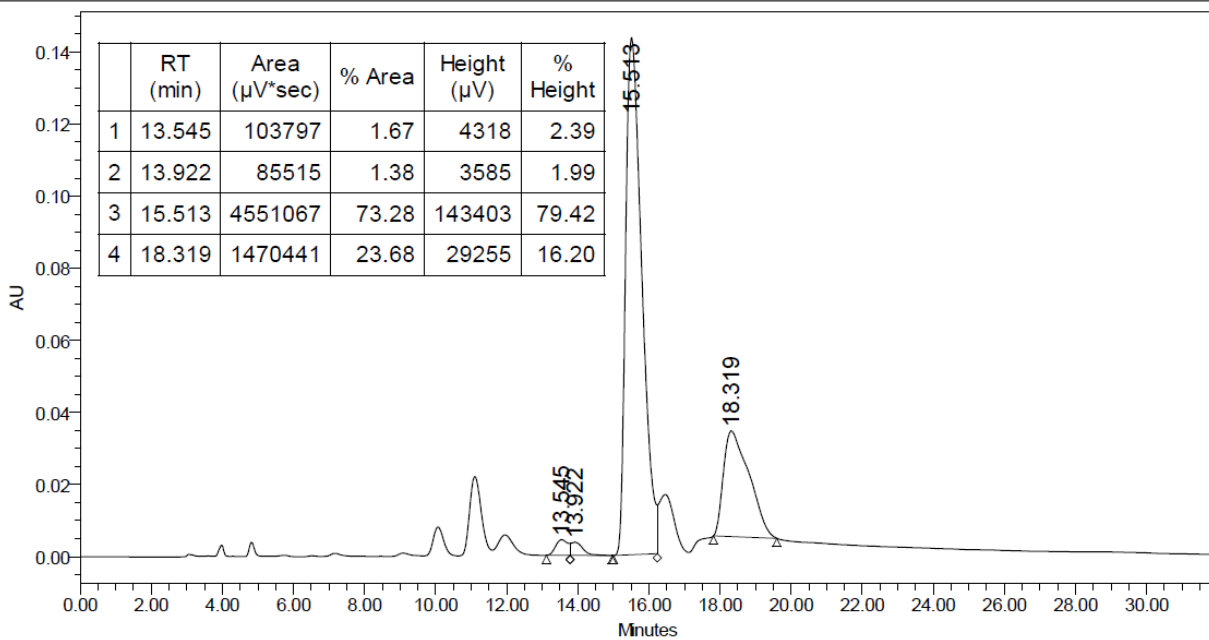

1-5 (R)-2-((S)-(4-bromophenyl)(hydroxy)methyl)cyclohexanone

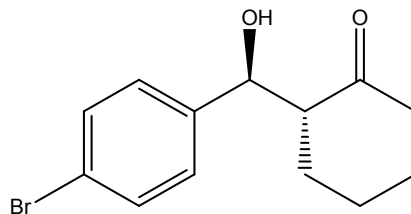

SAMPLE INFORMATION

|                   |               |                  |                           |
|-------------------|---------------|------------------|---------------------------|
| Sample Name:      | 4Brbenz+Cyhex | Acquired By:     | Breeze                    |
| Sample Type:      | Unknown       | Date Acquired:   | 8/30/2012 11:52:41 AM MYT |
| Vial:             | 1             | Acq. Method:     | Saadi                     |
| Injection #:      | 5             | Date Processed:  | 8/30/2012 1:08:58 PM MYT  |
| Injection Volume: | 10.00 ul      | Channel Name:    | W2489 ChA                 |
| Run Time:         | 45.00 Minutes | Sample Set Name: |                           |

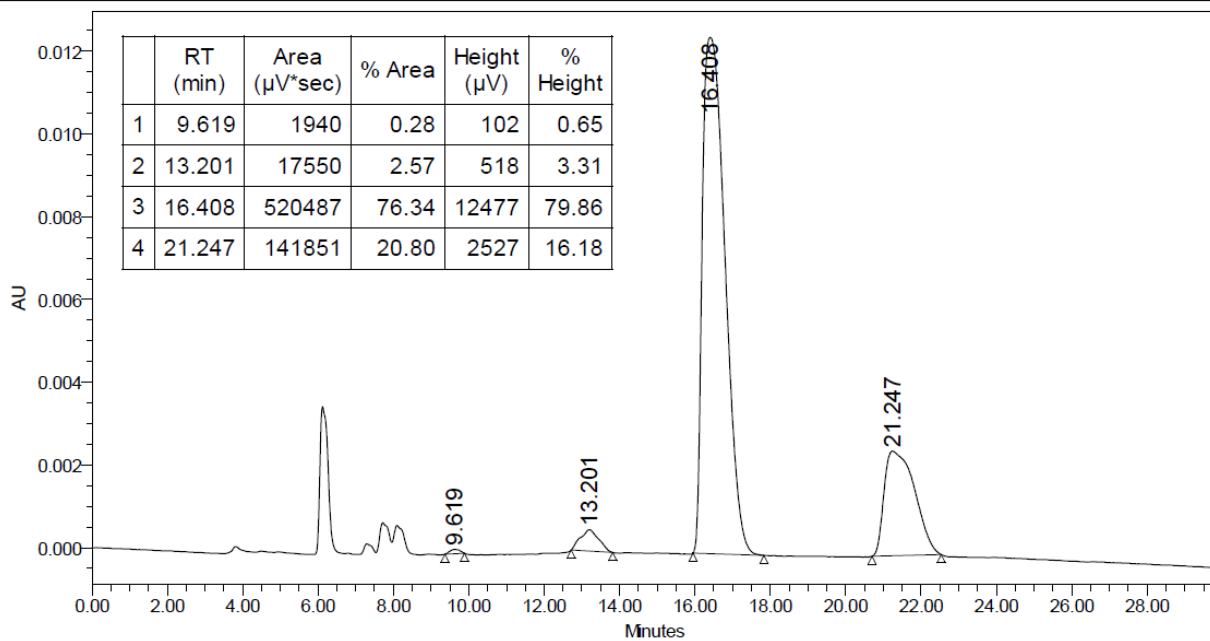

1-6 (R)-2-((S)-4-(trifluoromethyl)phenyl)(hydroxy)methyl)cyclohexanone

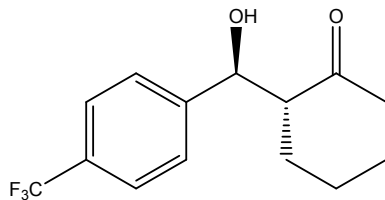

| SAMPLE INFORMATION |                |                  |                            |  |  |
|--------------------|----------------|------------------|----------------------------|--|--|
| Sample Name:       | p.CF3Ben+Cyhex | Acquired By:     | Breeze                     |  |  |
| Sample Type:       | Unknown        | Date Acquired:   | 10/16/2012 10:44:26 AM MYT |  |  |
| Vial:              | 1              | Acq. Method:     | Saadi                      |  |  |
| Injection #:       | 2              | Date Processed:  | 10/16/2012 3:03:42 PM MYT  |  |  |
| Injection Volume:  | 10.00 ul       | Channel Name:    | W2489 ChA                  |  |  |
| Run Time:          | 30.00 Minutes  | Sample Set Name: |                            |  |  |

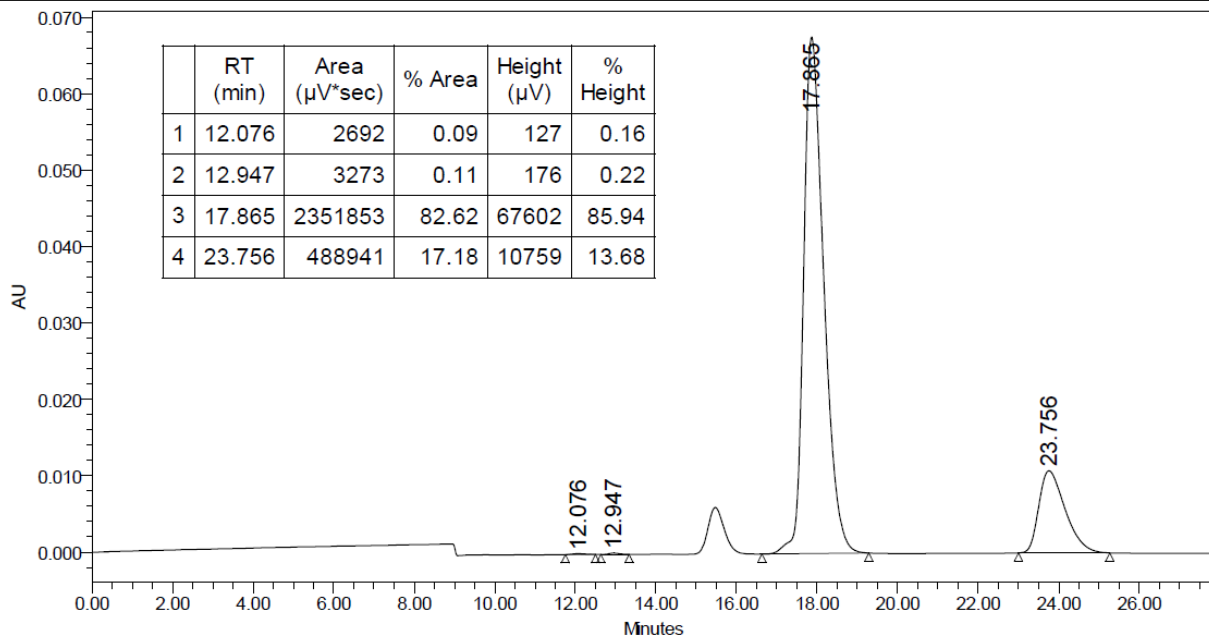

## 2 - Aldol reaction catalyzed by PH-18aa

### 2-1 (R)-2-((S)-hydroxy(4-nitrophenyl)methyl)cyclohexanone

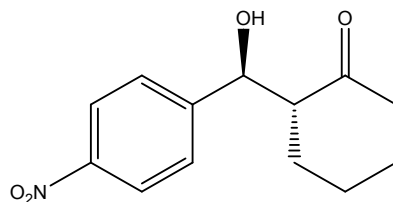

#### SAMPLE INFORMATION

|                   |                  |                  |                          |
|-------------------|------------------|------------------|--------------------------|
| Sample Name:      | 4Nitro.Ben-Cyhex | Acquired By:     | Breeze                   |
| Sample Type:      | Unknown          | Date Acquired:   | 7/17/2012 2:21:18 PM MYT |
| Vial:             | 1                | Acq. Method:     | Saadi                    |
| Injection #:      | 2                | Date Processed:  | 7/17/2012 3:15:08 PM MYT |
| Injection Volume: | 10.00 ul         | Channel Name:    | W2489 ChA                |
| Run Time:         | 35.00 Minutes    | Sample Set Name: |                          |

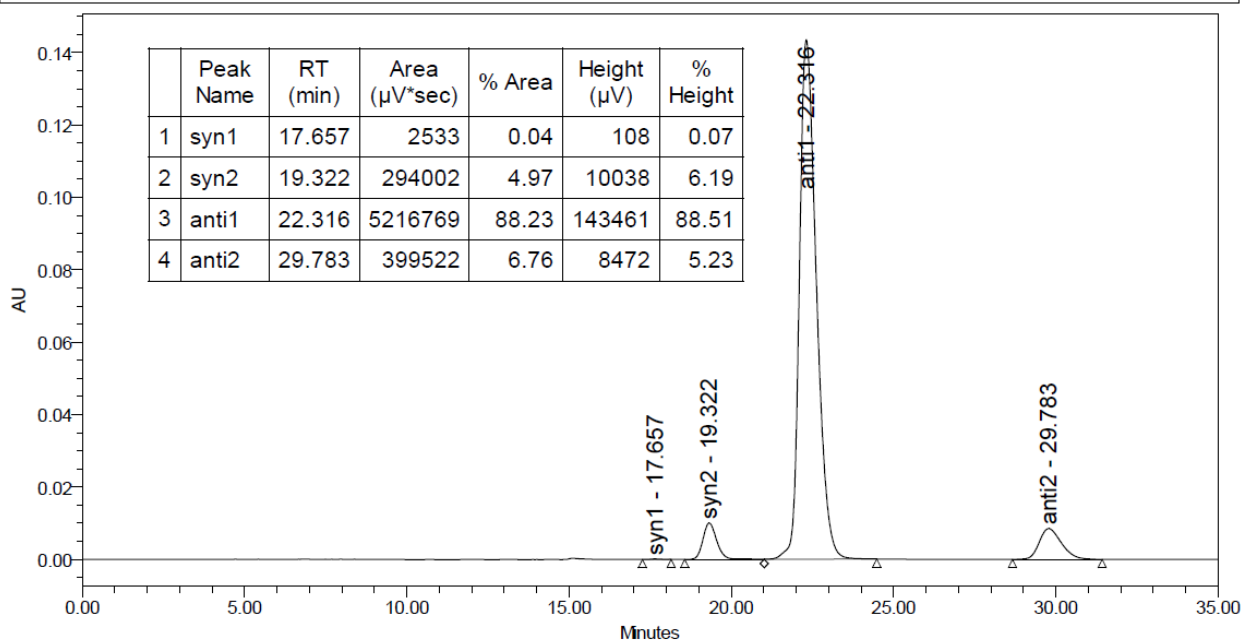



2-2 (R)-2-((S)-hydroxy(4-nitrophenyl)methyl)cyclohexanone (in 1%SDS/iPrOH)

| SAMPLE INFORMATION |                            |                  |                           |  |  |
|--------------------|----------------------------|------------------|---------------------------|--|--|
| Sample Name:       | 4-nitroben+Chex(8aa.1%SDS) | Acquired By:     | Breeze                    |  |  |
| Sample Type:       | Unknown                    | Date Acquired:   | 10/19/2012 5:09:53 PM MYT |  |  |
| Vial:              | 1                          | Acq. Method:     | Saadi                     |  |  |
| Injection #:       | 5                          | Date Processed:  | 10/22/2012 5:42:43 PM MYT |  |  |
| Injection Volume:  | 10.00 ul                   | Channel Name:    | W2489 ChB                 |  |  |
| Run Time:          | 24.00 Minutes              | Sample Set Name: |                           |  |  |

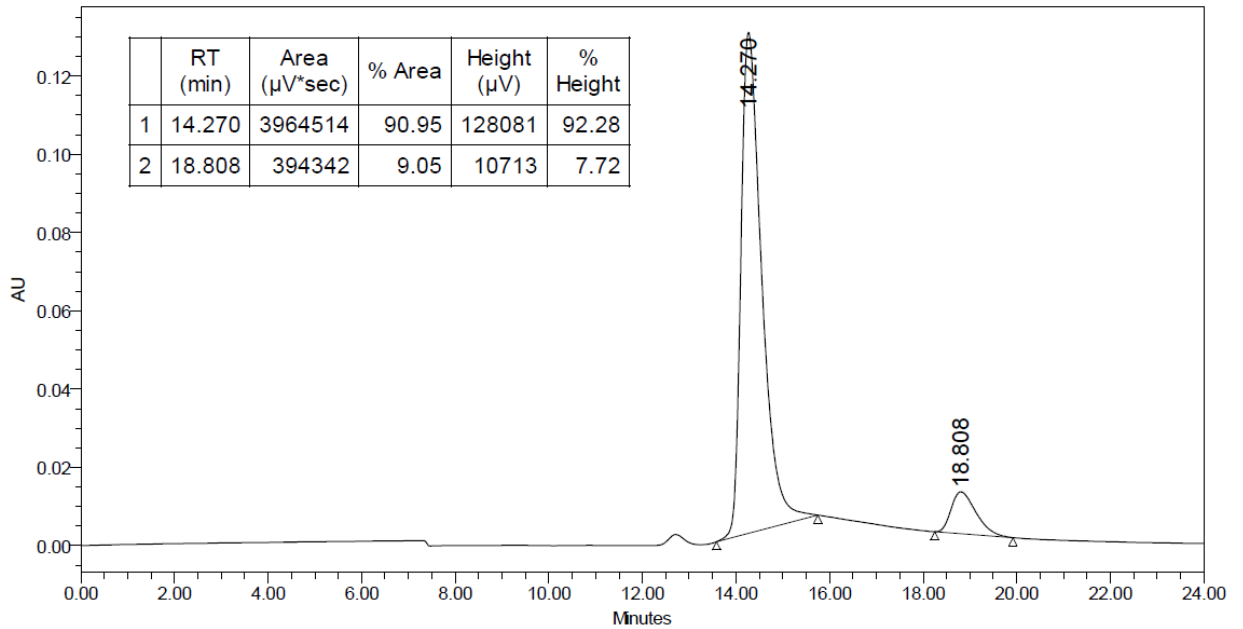

2-3 (S)-2-((S)-(4-chlorophenyl)(XXXhydroxyl)methyl)cyclohexanone

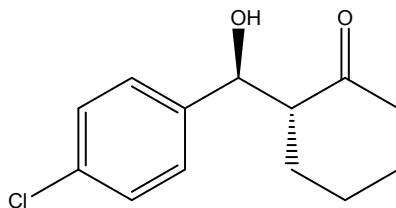

SAMPLE INFORMATION

|                   |                            |                  |                           |
|-------------------|----------------------------|------------------|---------------------------|
| Sample Name:      | 4Cl.Ben-Cyhex(P.H-16aa,aq) | Acquired By:     | Breeze                    |
| Sample Type:      | Unknown                    | Date Acquired:   | 10/12/2012 4:16:29 PM MYT |
| Vial:             | 1                          | Acq. Method:     | Saadi                     |
| Injection #:      | 7                          | Date Processed:  | 10/15/2012 2:52:05 PM MYT |
| Injection Volume: | 10.00 ul                   | Channel Name:    | W2489 ChB                 |
| Run Time:         | 30.00 Minutes              | Sample Set Name: |                           |

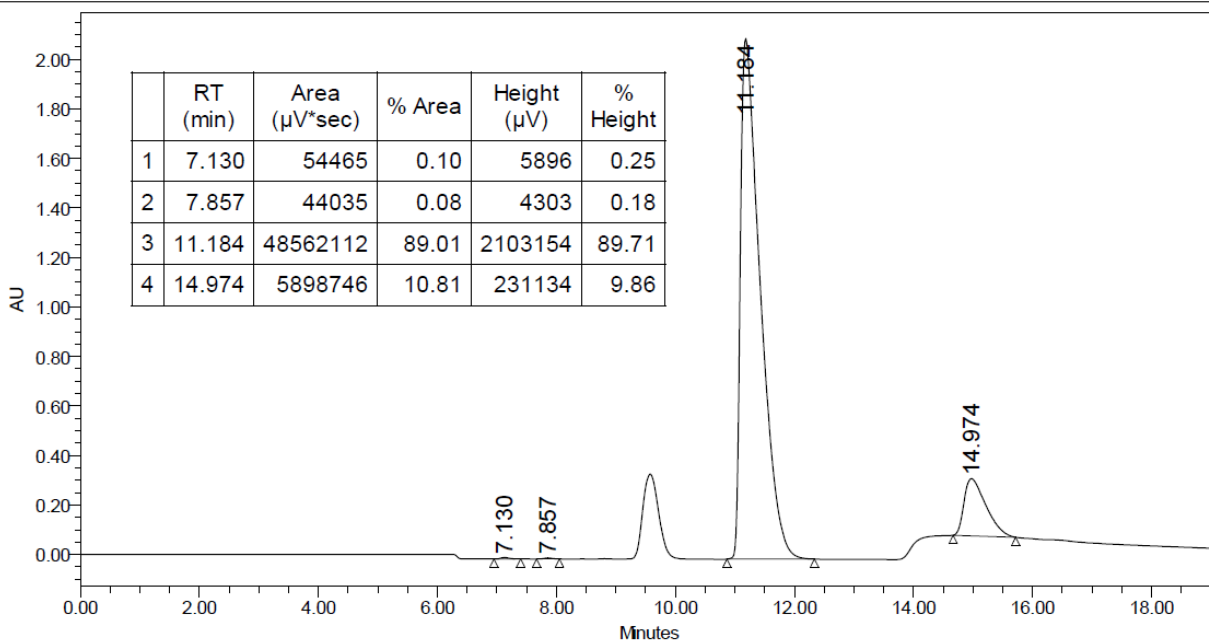

2-4 (S)-2-((S)-(2-chlorophenyl)(XXXhydroxyl)methyl)cyclohexanone

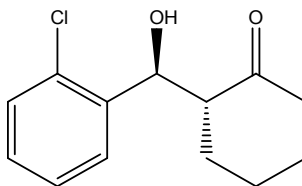

SAMPLE INFORMATION

|                   |                          |                  |                           |
|-------------------|--------------------------|------------------|---------------------------|
| Sample Name:      | 2-Clbenz+Cyhex(P.H-16aa) | Acquired By:     | Breeze                    |
| Sample Type:      | Unknown                  | Date Acquired:   | 10/17/2012 2:31:46 PM MYT |
| Vial:             | 1                        | Acq. Method:     | Saadi                     |
| Injection #:      | 3                        | Date Processed:  | 10/17/2012 2:53:44 PM MYT |
| Injection Volume: | 10.00 ul                 | Channel Name:    | W2489 ChB                 |
| Run Time:         | 20.00 Minutes            | Sample Set Name: |                           |

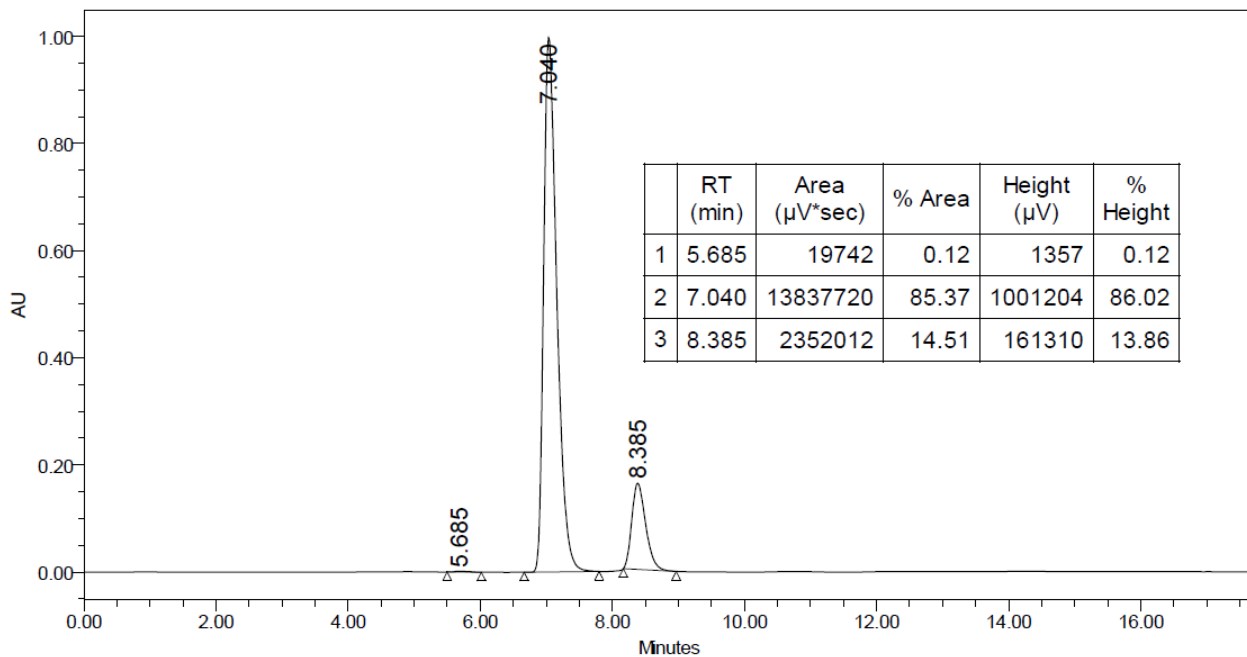

2-5 2-[Hydroxy-(4-cyano-phenyl)-methyl]-cyclohexanone



| SAMPLE INFORMATION |                            |                  |                           |  |  |
|--------------------|----------------------------|------------------|---------------------------|--|--|
| Sample Name:       | 4CN.Ben-Cyhex(P.H-16aa,aq) | Acquired By:     | Breeze                    |  |  |
| Sample Type:       | Unknown                    | Date Acquired:   | 10/12/2012 5:29:09 PM MYT |  |  |
| Vial:              | 1                          | Acq. Method:     | Saadi                     |  |  |
| Injection #:       | 9                          | Date Processed:  | 10/15/2012 2:55:34 PM MYT |  |  |
| Injection Volume:  | 10.00 ul                   | Channel Name:    | W2489 ChA                 |  |  |
| Run Time:          | 40.00 Minutes              | Sample Set Name: |                           |  |  |

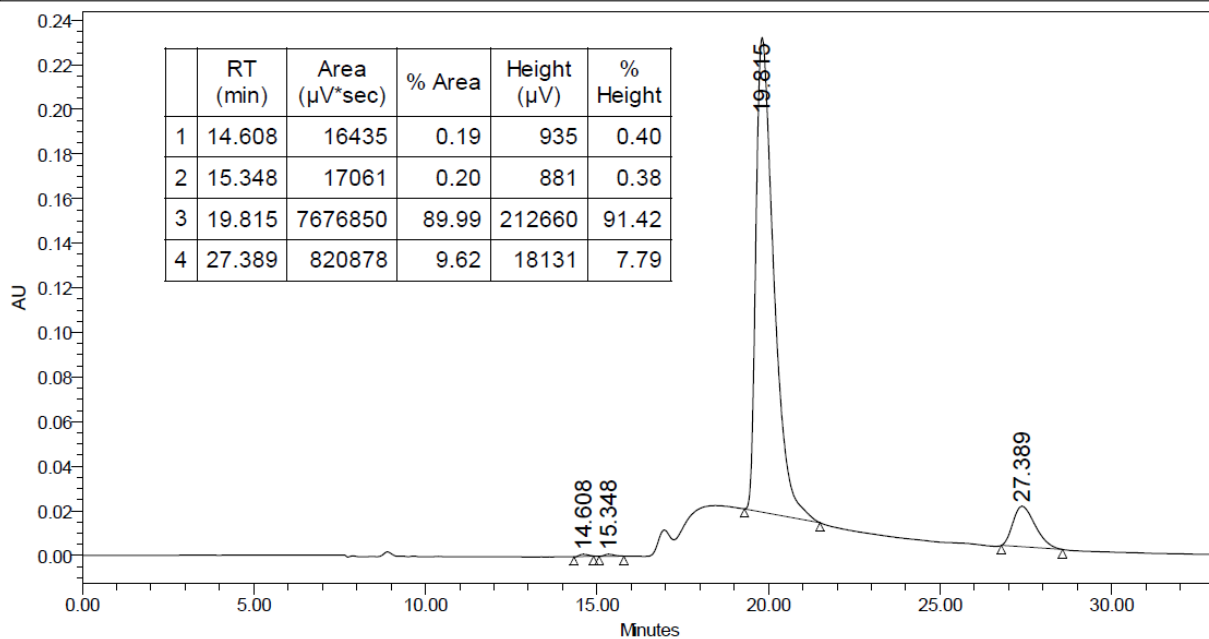

2-6 (R)-2-((S)-hydroxy(2-nitrophenyl)methyl)cyclohexanone



SAMPLE INFORMATION

|                   |                               |                  |                           |
|-------------------|-------------------------------|------------------|---------------------------|
| Sample Name:      | 2Nitro.Ben-Cyhex(P.H-16aa,aq) | Acquired By:     | Breeze                    |
| Sample Type:      | Unknown                       | Date Acquired:   | 10/15/2012 4:26:01 PM MYT |
| Vial:             | 1                             | Acq. Method:     | Saadi                     |
| Injection #:      | 6                             | Date Processed:  | 10/15/2012 4:55:48 PM MYT |
| Injection Volume: | 10.00 ul                      | Channel Name:    | W2489 ChA                 |
| Run Time:         | 30.00 Minutes                 | Sample Set Name: |                           |

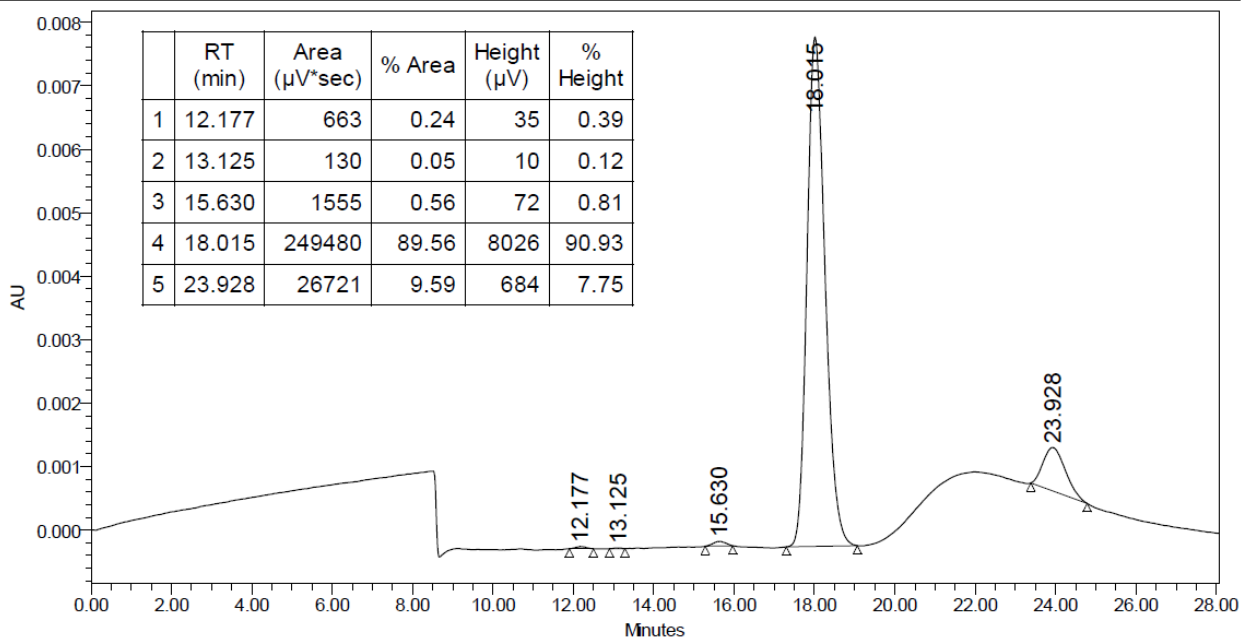

2-7 (R)-2-((S)-(4-bromophenyl)(hydroxy)methyl)cyclohexanone

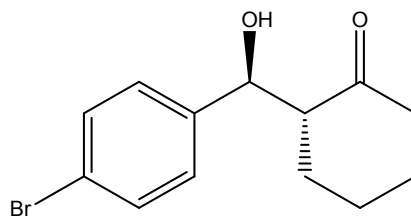

SAMPLE INFORMATION

|                   |                            |                  |                           |
|-------------------|----------------------------|------------------|---------------------------|
| Sample Name:      | 4Br.Ben-Cyhex(P.H-16aa,aq) | Acquired By:     | Breeze                    |
| Sample Type:      | Unknown                    | Date Acquired:   | 10/12/2012 3:29:47 PM MYT |
| Vial:             | 1                          | Acq. Method:     | Saadi                     |
| Injection #:      | 4                          | Date Processed:  | 10/15/2012 2:48:10 PM MYT |
| Injection Volume: | 10.00 ul                   | Channel Name:    | W2489 ChB                 |
| Run Time:         | 17.00 Minutes              | Sample Set Name: |                           |

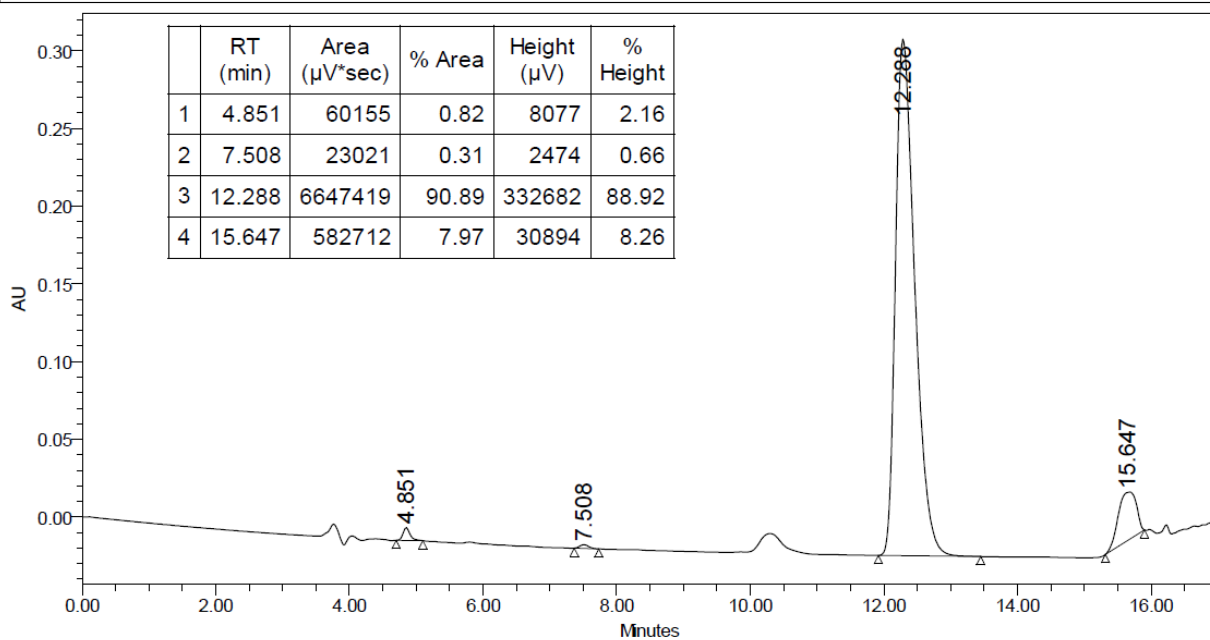

2-8 (R)-2-((S)-4-(trifluoromethyl)phenyl)(hydroxy)methyl)cyclohexanone

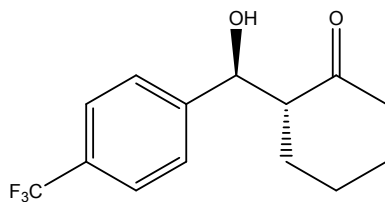

| SAMPLE INFORMATION |                              |                  |                          |  |  |
|--------------------|------------------------------|------------------|--------------------------|--|--|
| Sample Name:       | 4-CF3Benz+Cyhex(P.H-16aa,aq) | Acquired By:     | Breeze                   |  |  |
| Sample Type:       | Unknown                      | Date Acquired:   | 9/13/2012 1:18:26 PM MYT |  |  |
| Vial:              | 1                            | Acq. Method:     | Saadi                    |  |  |
| Injection #:       | 7                            | Date Processed:  | 9/13/2012 2:17:05 PM MYT |  |  |
| Injection Volume:  | 10.00 ul                     | Channel Name:    | W2489 ChA                |  |  |
| Run Time:          | 50.00 Minutes                | Sample Set Name: |                          |  |  |

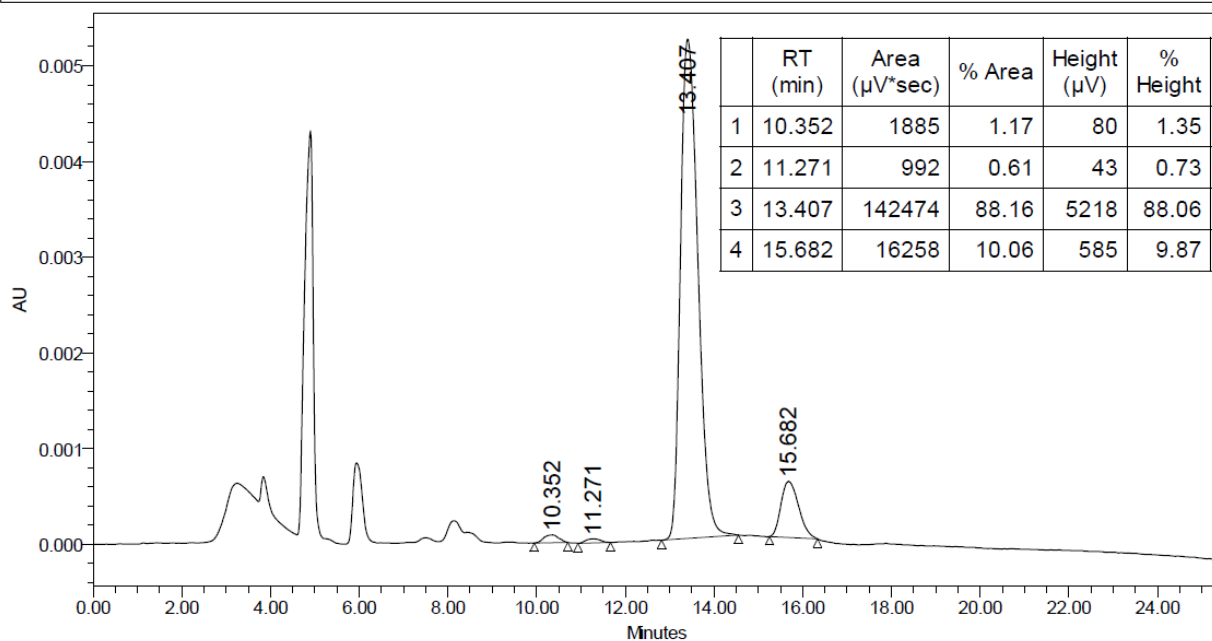

2-9 (R)-2-((S)-hydroxy(phenyl)methyl)cyclohexanone

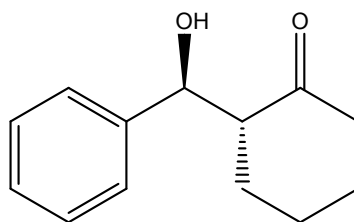

SAMPLE INFORMATION

|                   |                      |                  |                            |
|-------------------|----------------------|------------------|----------------------------|
| Sample Name:      | Benz+Cyhex(P.H-16aa) | Acquired By:     | Breeze                     |
| Sample Type:      | Unknown              | Date Acquired:   | 10/18/2012 12:20:42 PM MYT |
| Vial:             | 1                    | Acq. Method:     | Saadi                      |
| Injection #:      | 4                    | Date Processed:  | 10/18/2012 1:10:34 PM MYT  |
| Injection Volume: | 10.00 ul             | Channel Name:    | W2489 ChB                  |
| Run Time:         | 17.00 Minutes        | Sample Set Name: |                            |

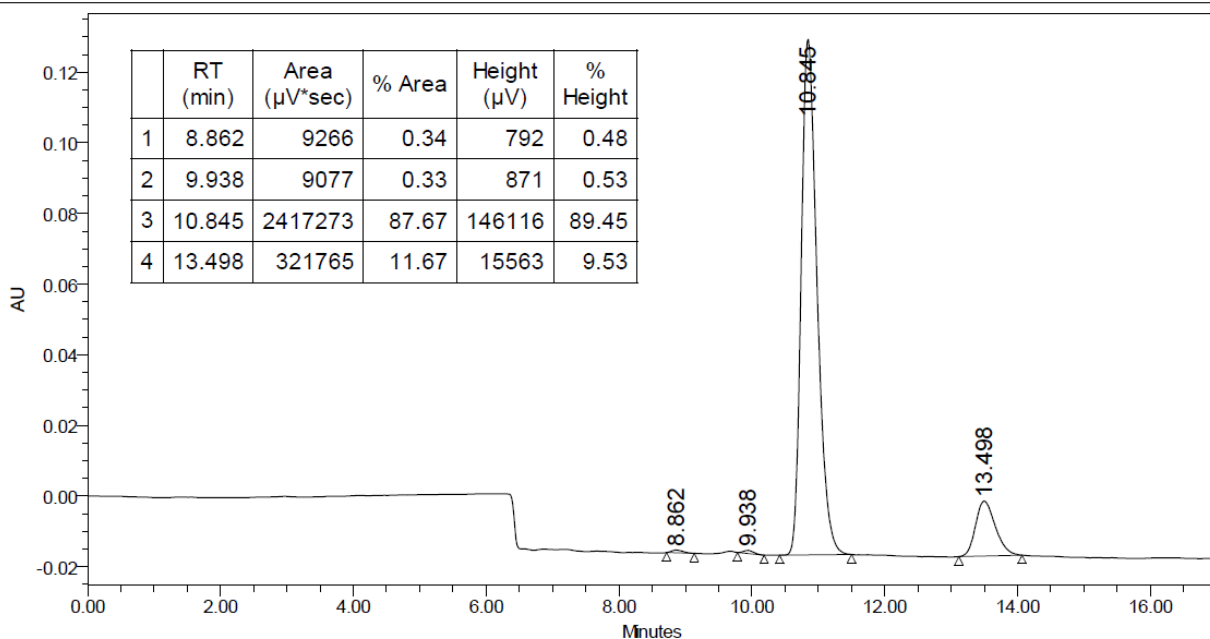



2-10 (S)-4-hydroxy-4-(4-nitrophenyl)butan-2-one

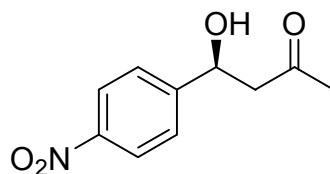

SAMPLE INFORMATION

|                   |                            |                  |                           |
|-------------------|----------------------------|------------------|---------------------------|
| Sample Name:      | 4NitroBen+acetone (PH16aa) | Acquired By:     | Breeze                    |
| Sample Type:      | Unknown                    | Date Acquired:   | 4/15/2013 10:12:28 AM MYT |
| Vial:             | 1                          | Acq. Method:     | Saadi                     |
| Injection #:      | 1                          | Date Processed:  | 4/15/2013 11:43:59 AM MYT |
| Injection Volume: | 0.00 ul                    | Channel Name:    | W2489 ChA                 |
| Run Time:         | 60.00 Minutes              | Sample Set Name: |                           |

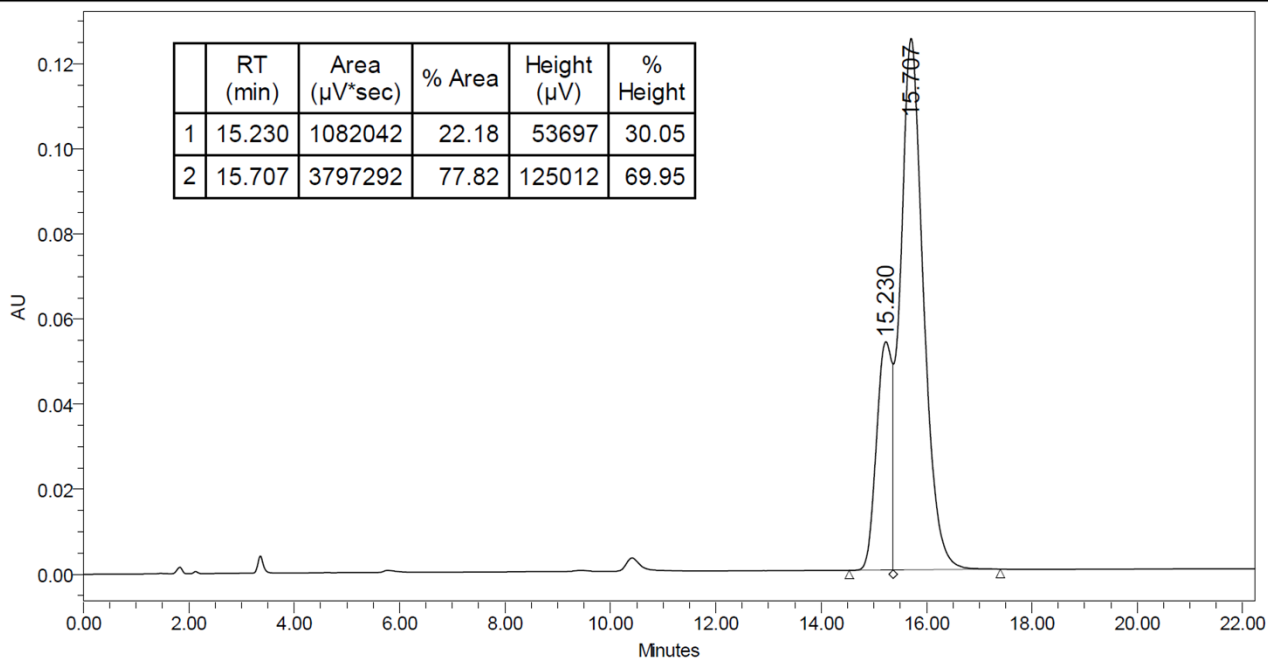

2-11 (S)-4-(4-chlorophenyl)-4-hydroxybutan-2-one

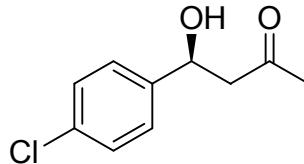

SAMPLE INFORMATION

|                   |                         |                  |                          |
|-------------------|-------------------------|------------------|--------------------------|
| Sample Name:      | 4ClBen+acetone (PH16aa) | Acquired By:     | Breeze                   |
| Sample Type:      | Unknown                 | Date Acquired:   | 4/15/2013 1:20:30 PM MYT |
| Vial:             | 1                       | Acq. Method:     | Saadi                    |
| Injection #:      | 10                      | Date Processed:  | 4/15/2013 1:36:36 PM MYT |
| Injection Volume: | 0.00 ul                 | Channel Name:    | W2489 ChB                |
| Run Time:         | 60.00 Minutes           | Sample Set Name: |                          |

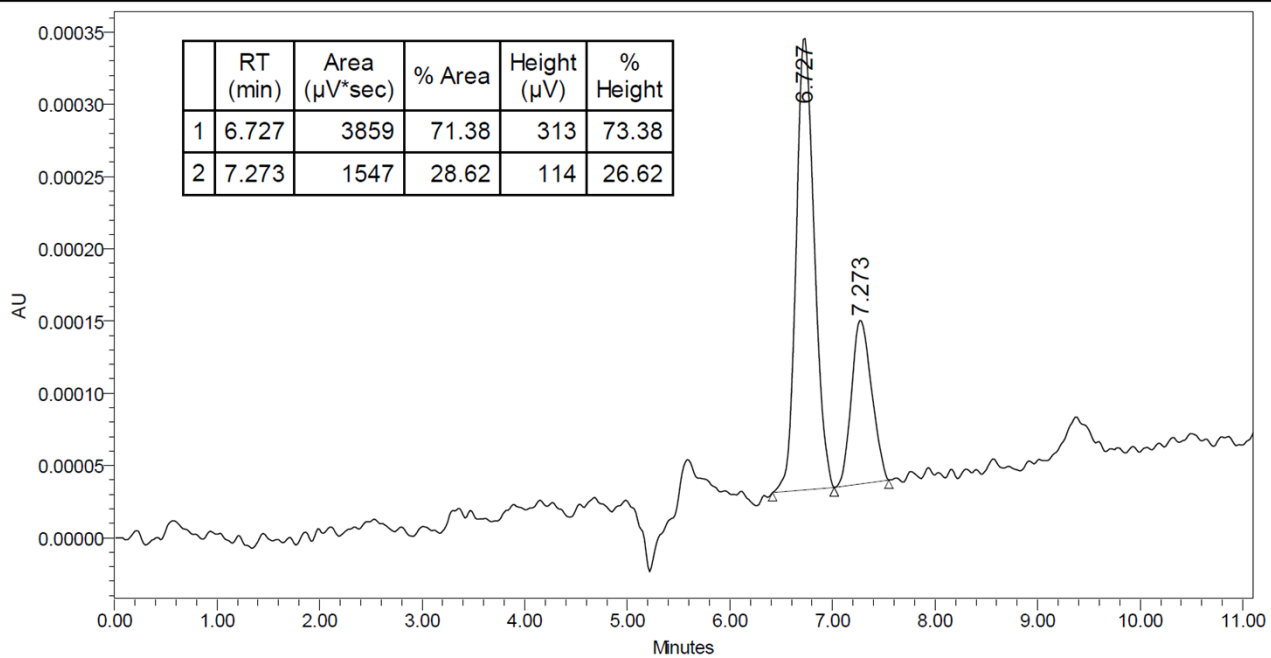

2-12 (S)-4-(4-(trifluoromethyl)phenyl)-4-hydroxybutan-2-one

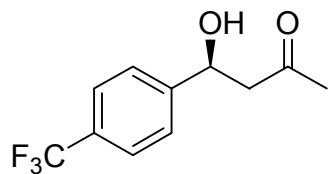

| SAMPLE INFORMATION |                 |                  |                           |  |  |
|--------------------|-----------------|------------------|---------------------------|--|--|
| Sample Name:       | 4CF3Ben+acetone | Acquired By:     | Breeze                    |  |  |
| Sample Type:       | Unknown         | Date Acquired:   | 4/15/2013 10:57:19 AM MYT |  |  |
| Vial:              | 1               | Acq. Method:     | Saadi                     |  |  |
| Injection #:       | 3               | Date Processed:  | 4/15/2013 11:44:37 AM MYT |  |  |
| Injection Volume:  | 0.00 ul         | Channel Name:    | W2489 ChB                 |  |  |
| Run Time:          | 60.00 Minutes   | Sample Set Name: |                           |  |  |

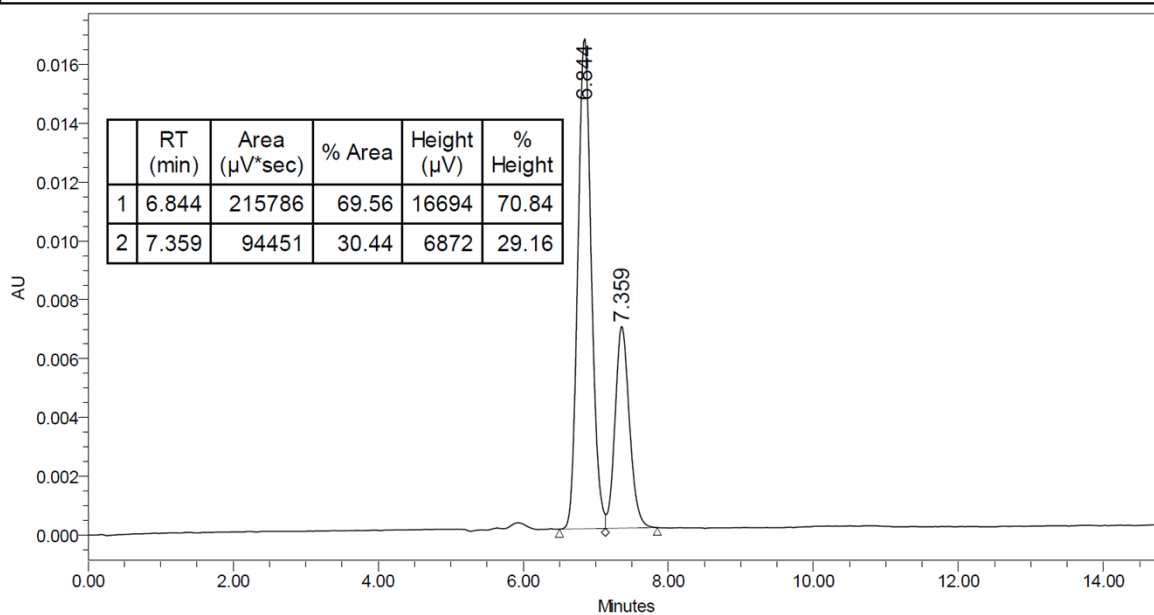

2-13 (S)-4-(4-bromophenyl)-4-hydroxybutan-2-one

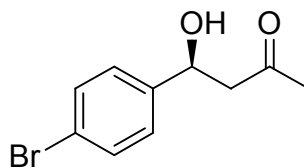

| SAMPLE INFORMATION |                         |                  |                          |  |  |
|--------------------|-------------------------|------------------|--------------------------|--|--|
| Sample Name:       | 4BrBen+acetone (PH16aa) | Acquired By:     | Breeze                   |  |  |
| Sample Type:       | Unknown                 | Date Acquired:   | 4/15/2013 3:18:22 PM MYT |  |  |
| Vial:              | 1                       | Acq. Method:     | Saadi                    |  |  |
| Injection #:       | 15                      | Date Processed:  | 4/15/2013 3:31:52 PM MYT |  |  |
| Injection Volume:  | 0.00 ul                 | Channel Name:    | W2489 ChB                |  |  |
| Run Time:          | 60.00 Minutes           | Sample Set Name: |                          |  |  |

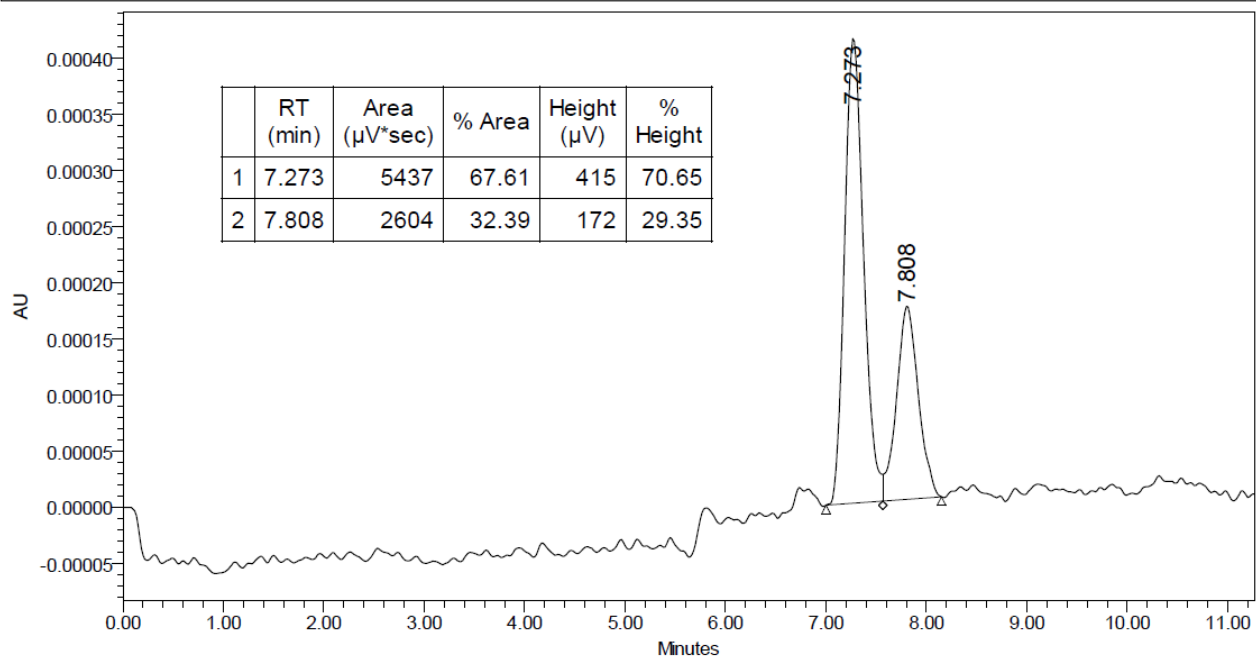

2-14 (S)-4-hydroxy-4-(2-nitrophenyl)butan-2-one

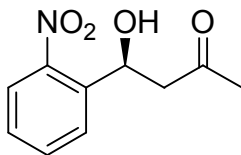

SAMPLE INFORMATION

|                   |                            |                  |                           |
|-------------------|----------------------------|------------------|---------------------------|
| Sample Name:      | 2NitroBen+acetone (PH16aa) | Acquired By:     | Breeze                    |
| Sample Type:      | Unknown                    | Date Acquired:   | 4/15/2013 11:12:45 AM MYT |
| Vial:             | 1                          | Acq. Method:     | Saadi                     |
| Injection #:      | 4                          | Date Processed:  | 4/15/2013 11:46:57 AM MYT |
| Injection Volume: | 0.00 ul                    | Channel Name:    | W2489 ChA                 |
| Run Time:         | 60.00 Minutes              | Sample Set Name: |                           |

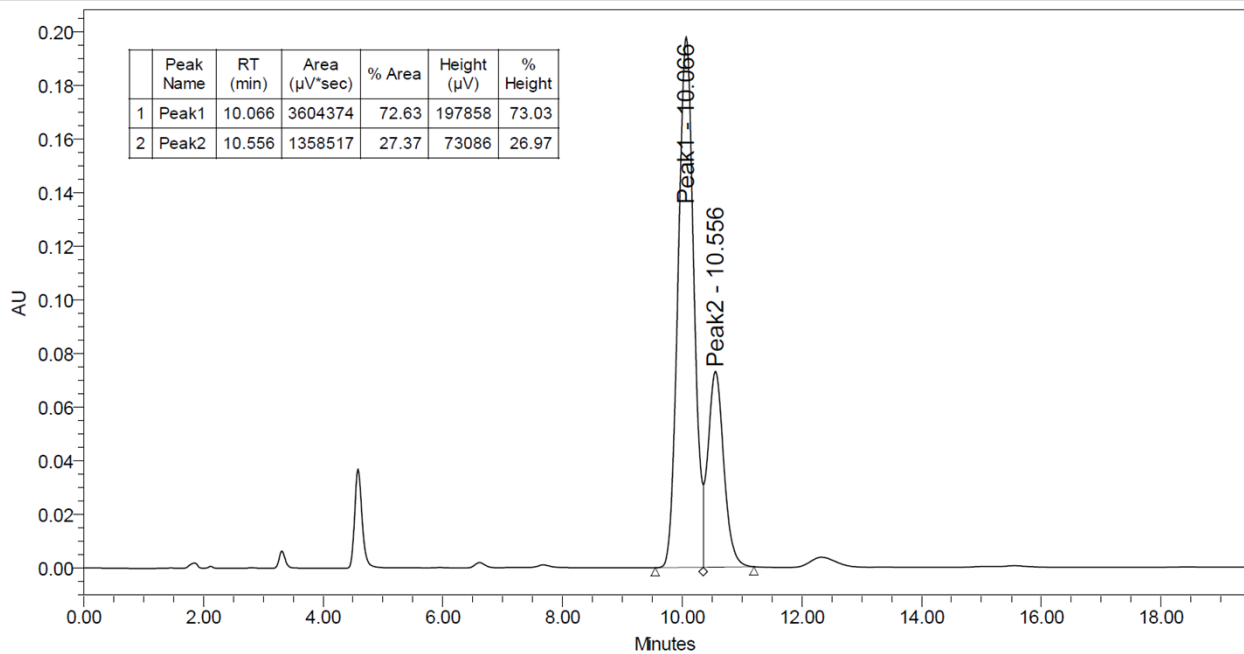

➤ HPLC of peptide (PH16aa)

| SAMPLE INFORMATION |                             |                  |                           |  |  |
|--------------------|-----------------------------|------------------|---------------------------|--|--|
| Sample Name:       | P-H-16aa (0.5mmol/gr resin) | Acquired By:     | Breeze                    |  |  |
| Sample Type:       | Unknown                     | Date Acquired:   | 9/10/2012 4:03:07 PM MYT  |  |  |
| Vial:              | 1                           | Acq. Method:     | Saadi RP                  |  |  |
| Injection #:       | 4                           | Date Processed:  | 9/18/2012 12:39:52 PM MYT |  |  |
| Injection Volume:  | 10.00 ul                    | Channel Name:    | W2489 ChB                 |  |  |
| Run Time:          | 70.00 Minutes               | Sample Set Name: |                           |  |  |

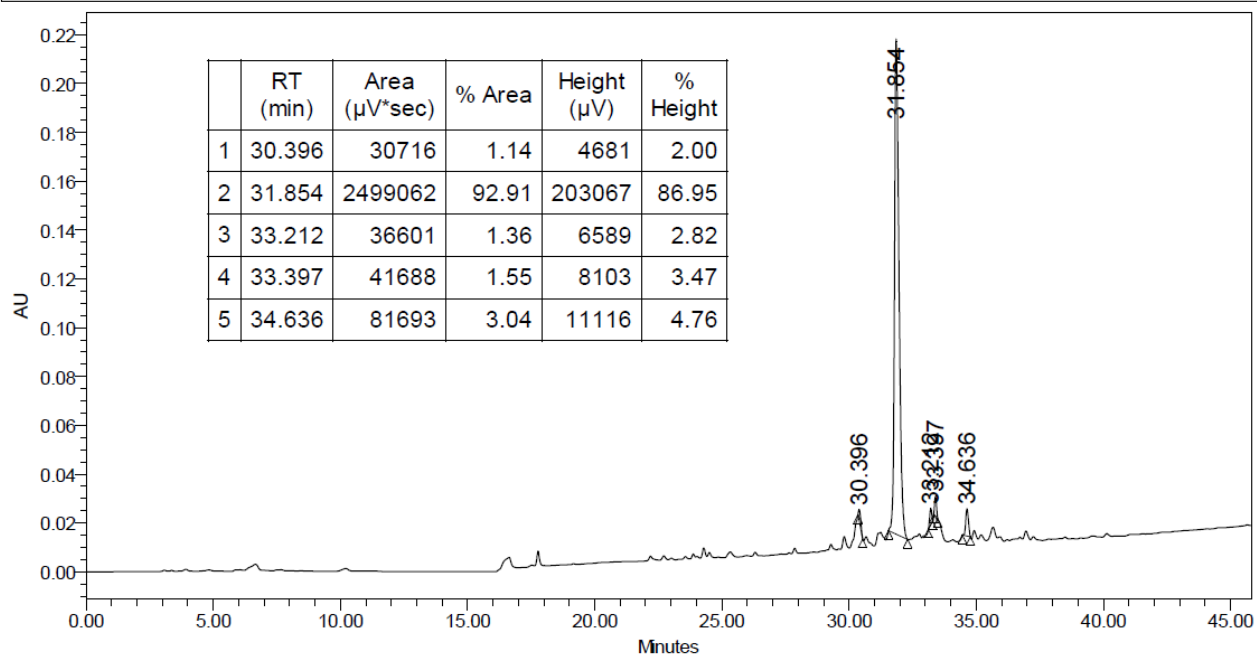

➤ LC-Mass spectra of PH16aa

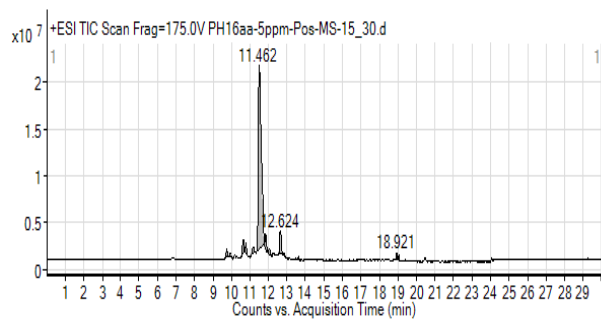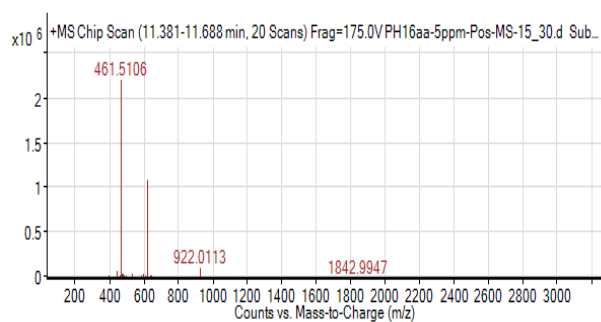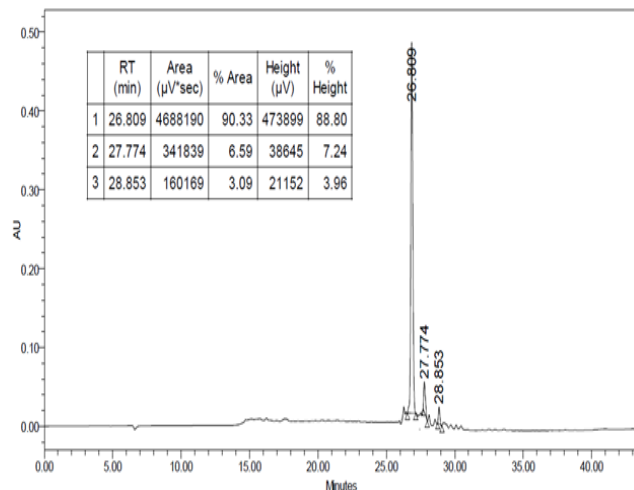

➤ FT-IR and CD spectrum of PH16aa

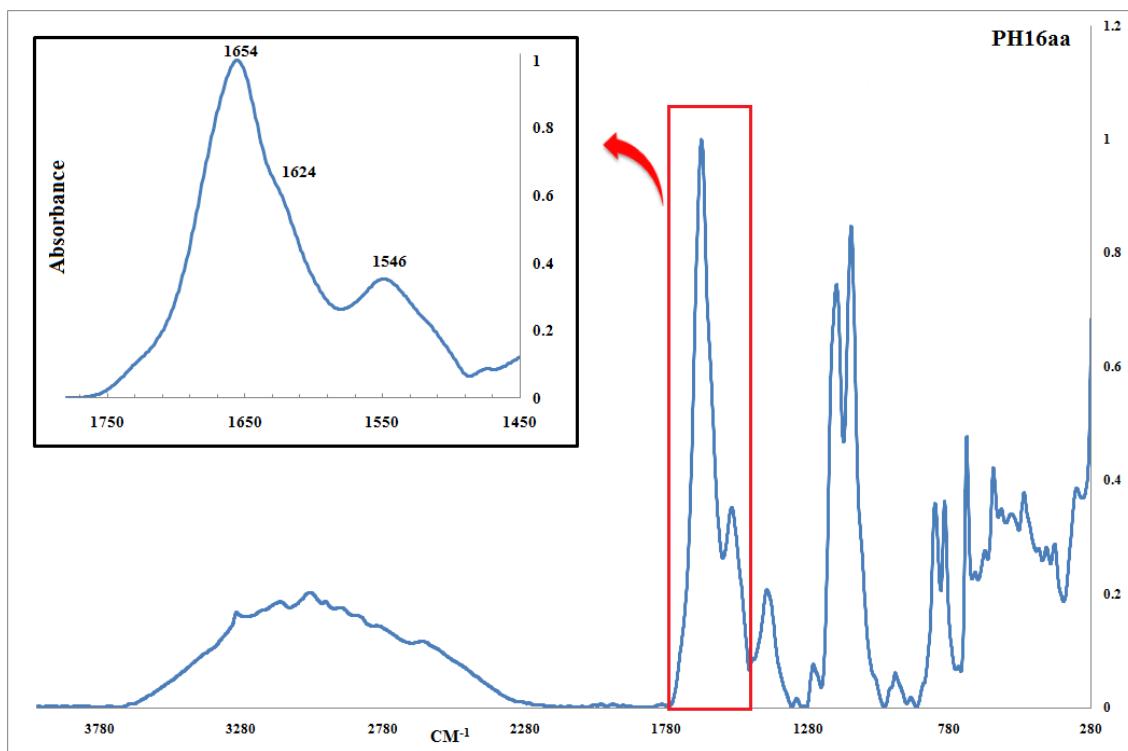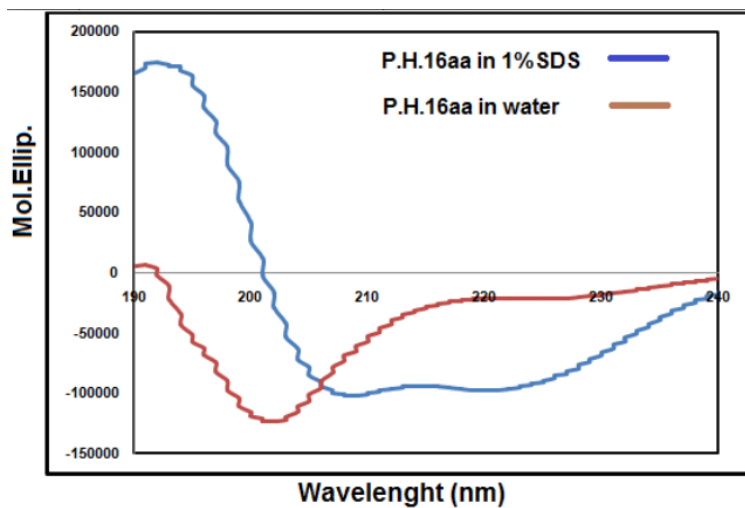

CD spectra in SDS (1%)

- Helix (%): 38.0
- Beta (%): 12.3
- Turn (%): 12.5
- Random (%): 31.6

CD spectra in water

- Helix (%): 15.2
- Beta (%): 28.1
- Turn (%): 12.5
- Random (%): 39.7



➤ FT-IR and CD spectrum of 16aa

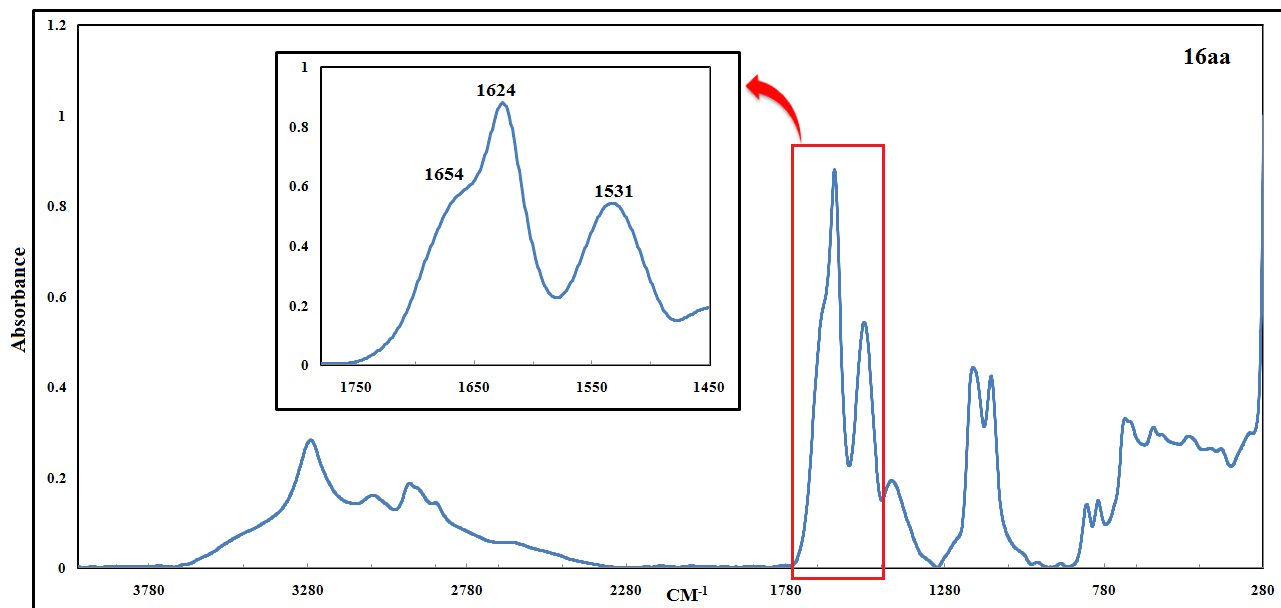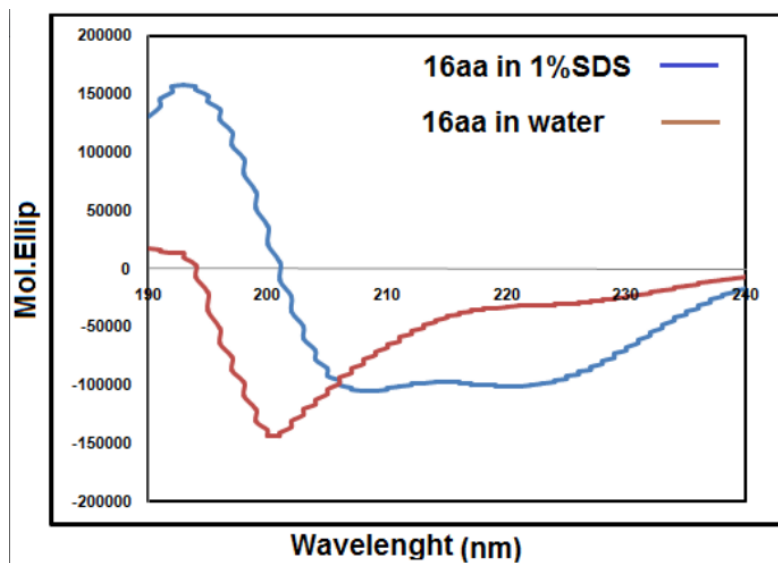

CD spectra in 1% SDS

|   |            |        |
|---|------------|--------|
| { | Helix (%)  | : 34.1 |
| { | Beta (%)   | : 13.8 |
| { | Turn (%)   | : 12.5 |
| { | Random (%) | : 32.7 |
| { | -----      |        |
| { | Sum (%)    | : 93.2 |

CD spectra in water

|   |            |        |
|---|------------|--------|
| { | Helix (%)  | : 18.5 |
| { | Beta (%)   | : 29.5 |
| { | Turn (%)   | : 12.5 |
| { | Random (%) | : 38.5 |
| { | -----      |        |
| { | Sum (%)    | : 99.0 |

➤ **Characterization of PE16aa**

- **HPLC of PE16aa**

UPM

Project Name: Saadi RP.

Reported by User: Breeze user (Breeze)

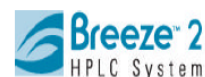

**SAMPLE INFORMATION**

|                   |                    |                  |                           |
|-------------------|--------------------|------------------|---------------------------|
| Sample Name:      | Pro-Glu-16AA. HPLC | Acquired By:     | Breeze                    |
| Sample Type:      | Unknown            | Date Acquired:   | 7/5/2012 4:28:55 PM MYT   |
| Vial:             | 1                  | Acq. Method:     | Saadi RP                  |
| Injection #:      | 2                  | Date Processed:  | 9/18/2012 12:28:44 PM MYT |
| Injection Volume: | 10.00 ul           | Channel Name:    | W2489 ChB                 |
| Run Time:         | 90.00 Minutes      | Sample Set Name: |                           |

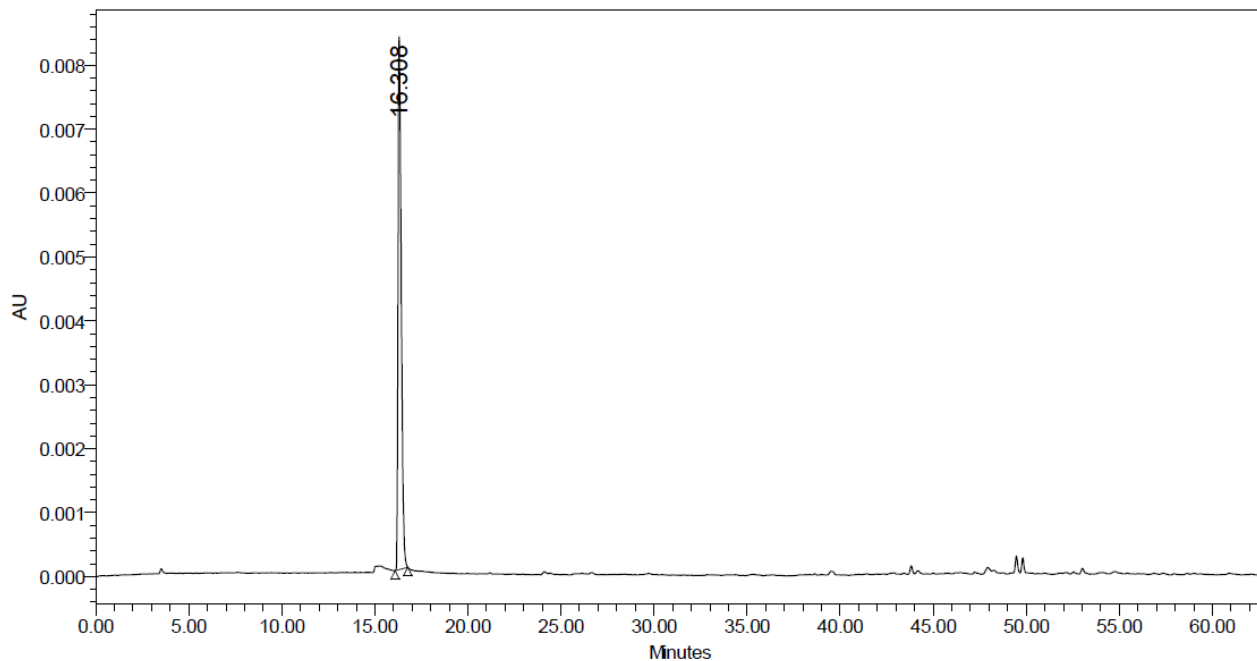

|   | RT<br>(min) | Area<br>( $\mu\text{V}\cdot\text{sec}$ ) | % Area | Height<br>( $\mu\text{V}$ ) | %<br>Height |
|---|-------------|------------------------------------------|--------|-----------------------------|-------------|
| 1 | 16.308      | 100019                                   | 100.00 | 8391                        | 100.00      |

- Spectroscopics data of PE-16aa

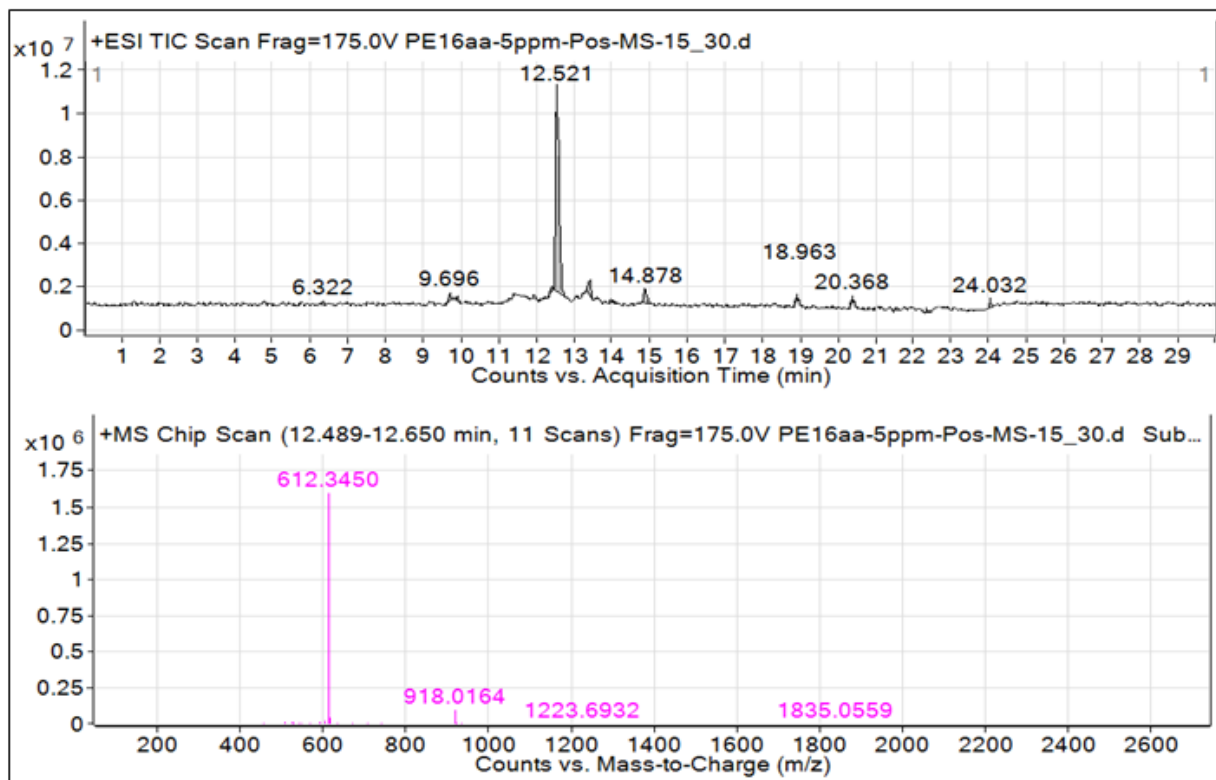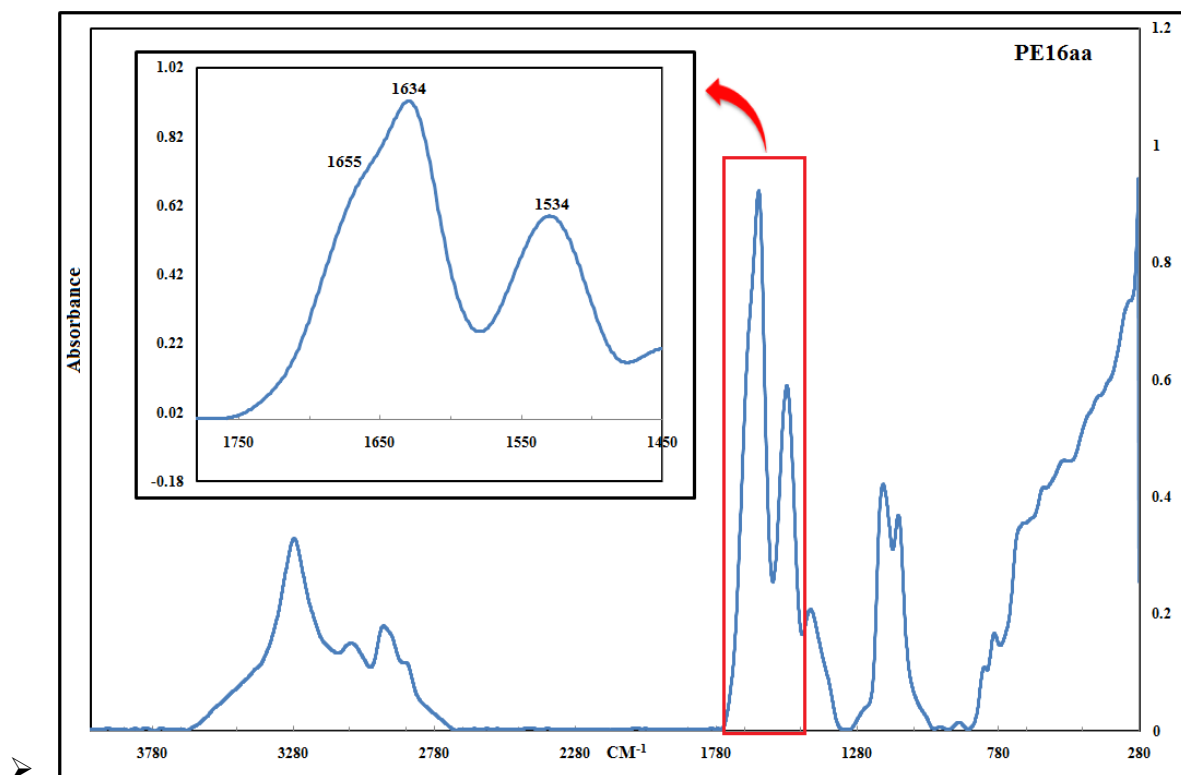

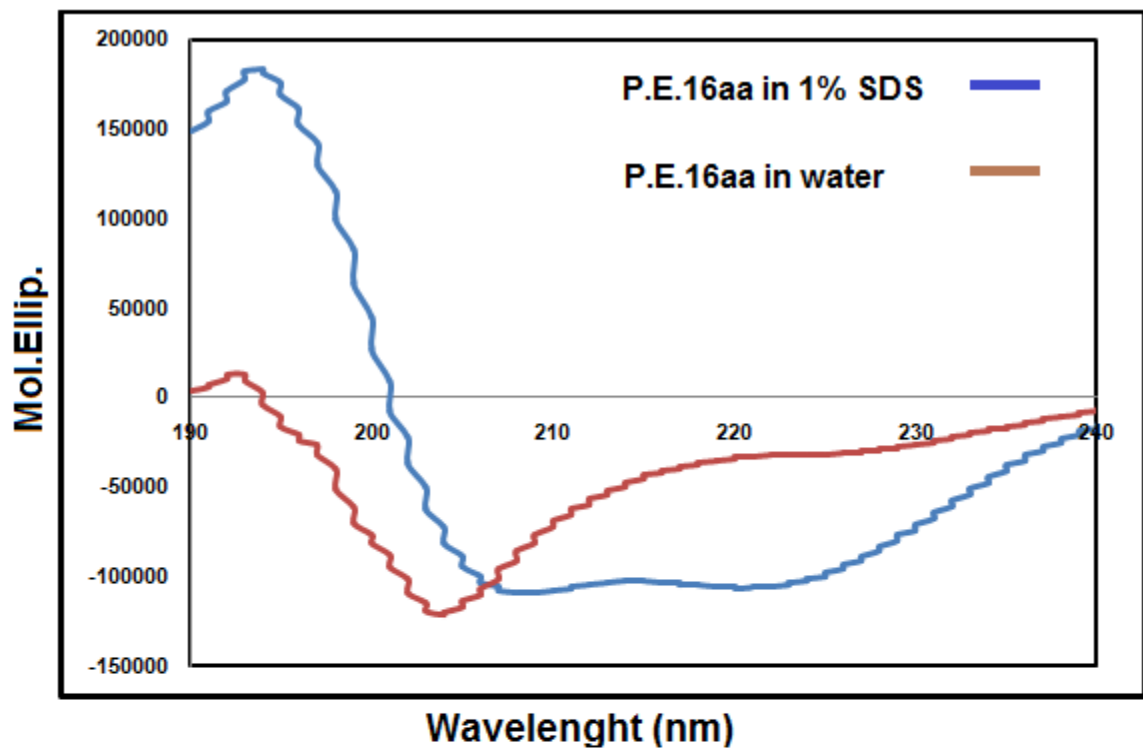

|                      |   |             |      |
|----------------------|---|-------------|------|
| CD spectra in 1% SDS | { | Helix (%):  | 36.5 |
|                      |   | Beta (%):   | 11.5 |
|                      |   | Turn (%):   | 12.5 |
|                      |   | Random (%): | 32.1 |
| CD spectra in water  | { | Helix (%):  | 19.1 |
|                      |   | Beta (%):   | 22.9 |
|                      |   | Turn (%):   | 12.5 |
|                      |   | Random (%): | 38.6 |

➤ HPLC analysis of 5aa

SAMPLE INFORMATION

|                   |               |                  |                         |
|-------------------|---------------|------------------|-------------------------|
| Sample Name:      | PELFV.NH2     | Acquired By:     | Breeze                  |
| Sample Type:      | Unknown       | Date Acquired:   | 2/6/2013 2:44:03 PM MYT |
| Vial:             | 1             | Acq. Method:     | Saadi                   |
| Injection #:      | 2             | Date Processed:  | 2/7/2013 1:27:59 PM MYT |
| Injection Volume: | 20.00 ul      | Channel Name:    | W2489 ChA               |
| Run Time:         | 66.00 Minutes | Sample Set Name: |                         |

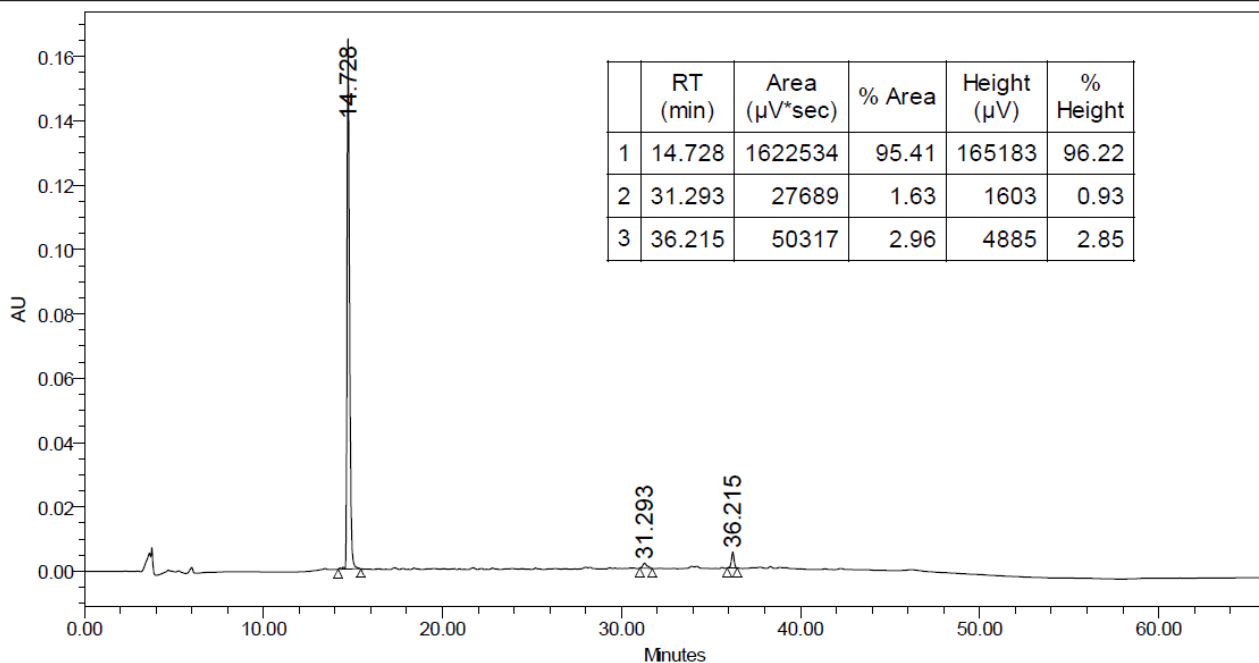

## ➤ HPLC analysis of 8aa(z)

UPM

Project Name: Saadi  
Reported by User: Breeze user (Breeze)

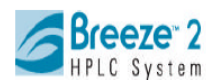

### SAMPLE INFORMATION

|                   |               |                  |                         |
|-------------------|---------------|------------------|-------------------------|
| Sample Name:      | 8aa (Lys-Z)   | Acquired By:     | Breeze                  |
| Sample Type:      | Unknown       | Date Acquired:   | 2/5/2013 4:58:26 PM MYT |
| Vial:             | 1             | Acq. Method:     | Test                    |
| Injection #:      | 18            | Date Processed:  | 2/5/2013 5:18:08 PM MYT |
| Injection Volume: | 0.00 ul       | Channel Name:    | W2489 ChA               |
| Run Time:         | 20.00 Minutes | Sample Set Name: |                         |

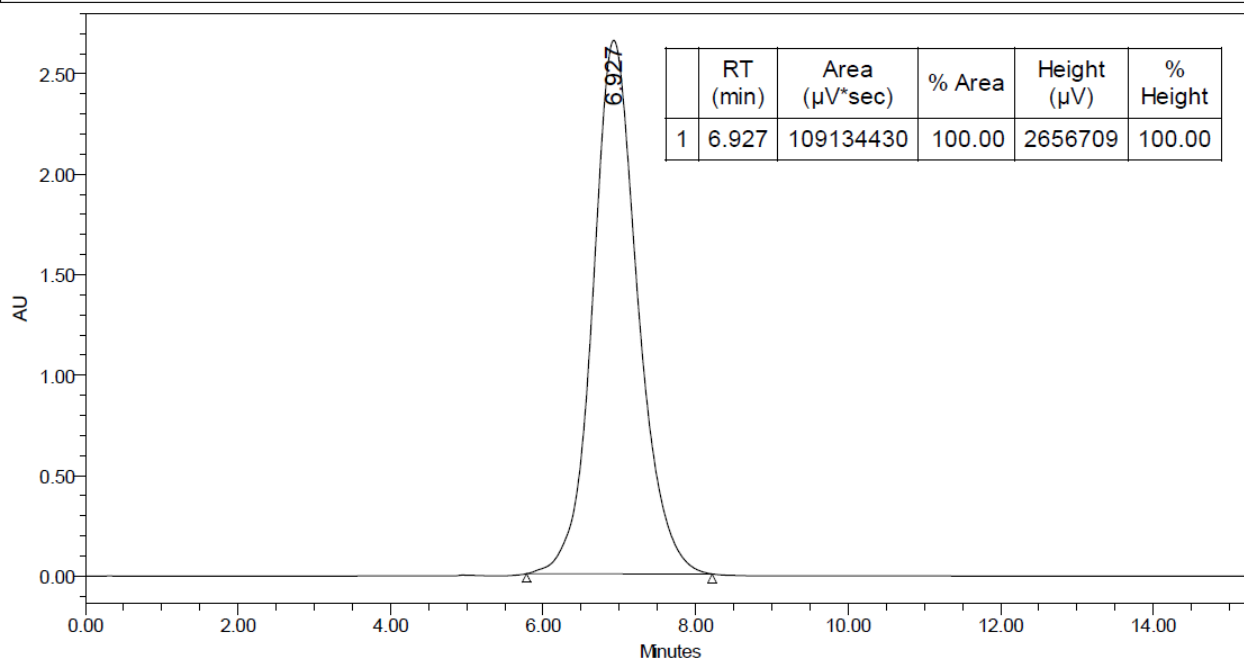

Supplement: c4ra04866k1.pdf [file c4ra04866k1.pdf]
